# Supplementary material for: Single-cell analysis reveals the COL11A1+ fibroblasts are cancer-specific fibroblasts that promote tumor progression
Source: Front Pharmacol. 2023 Jan 20;14:1121586. doi: 10.3389/fphar.2023.1121586 (PMC9894880; doi:10.3389/fphar.2023.1121586)
Supplement: Supplementary file 1 [file Table2.XLSX]

## Sheet: Table S2
Supplementary Table S2. The number of cells from each tissue
Tissue ID	Tissue Type	Number of Cells
1	BC	3379
2	BC	2436
3	BC	3761
4	BC	2229
5	BC	3593
6	BC	132
7	BC	932
8	BC	1565
9	BC	2856
10	BC	786
11	BC	3061
12	BC	307
13	BC	2569
14	BC	2004
15	CRC	1859
16	CRC	2012
17	CRC	3127
18	CRC	3256
19	CRC	2062
20	CRC	1708
21	CRC	2286
22	CRC	1563
23	CRC	435
24	CRC	432
25	CRC	347
26	CRC	476
27	CRC	533
28	CRC	733
29	ICC	3985
30	ICC	1591
31	ICC	2373
32	ICC	2545
33	ICC	4565
34	ICC	2878
35	ICC	2092
36	ICC	2866
37	LC	139
38	LC	192
39	LC	70
40	LC	224
41	LC	224
42	LC	284
43	LC	458
44	LC	6
45	LC	91
46	LC	1002
47	LC	75
48	LC	2502
49	LC	3123
50	LC	2228
51	LC	2653
52	LC	3848
53	LC	4129
54	LC	1936
55	LC	2396
56	LC	4074
57	LC	1151
58	LC	891
59	LC	398
60	LC	2411
61	LC	2914
62	LC	2977
63	LC	285
64	LC	2
65	OVC	415
66	OVC	4621
67	OVC	442
68	OVC	1192
69	OVC	2056
70	OVC	2725
71	OVC	357
72	OVC	1195
73	OVC	1860
74	OVC	1494
75	OVC	3744
76	OVC	4003
77	OVC	3974
78	OVC	788
79	PDAC	896
80	PDAC	1089
81	PDAC	1452
82	PDAC	1134
83	PDAC	973
84	PDAC	4492
85	PDAC	554
86	PDAC	2257
87	PDAC	874
88	PDAC	1579
89	PDAC	1903
90	PDAC	1405
91	PDAC	1102
92	PDAC	1893
93	PDAC	6777
94	PDAC	3970
95	PDAC	3690
96	PRAD	1249
97	PRAD	4551
98	PRAD	4642
99	PRAD	3201
100	PRAD	1227
101	PRAD	1260
102	PRAD	1230
103	PRAD	2697
104	PRAD	2048
105	PRAD	626
106	PRAD	2520
107	PRAD	5030
108	PRAD	1178
109	HCC_ICC	NA
110	HCC_ICC	NA
111	HCC_ICC	NA
112	HCC_ICC	NA
113	HCC_ICC	NA
114	HCC_ICC	NA
115	HCC_ICC	NA
116	HCC_ICC	NA
117	HCC_ICC	NA
118	HCC_ICC	NA
119	HCC_ICC	NA
120	HCC_ICC	NA
121	HCC_ICC	NA
122	HCC_ICC	NA
123	HCC_ICC	NA
124	HCC_ICC	NA
125	HCC_ICC	NA
126	HCC_ICC	NA
127	HCC_ICC	NA
128	CRC_Adj	1972
129	CRC_Adj	1767
130	CRC_Adj	1279
131	CRC_Adj	1430
132	CRC_Adj	803
133	CRC_Adj	790
134	CRC_Adj	1888
135	ICC_Adj	10303
136	ICC_Adj	4288
137	ICC_Adj	2085
138	LC_Adj	286
139	LC_Adj	3791
140	LC_Adj	1498
141	LC_Adj	5384
142	LC_Adj	2479
143	LC_Adj	5121
144	LC_Adj	2240
145	OVC_Adj	2796
146	OVC_Adj	1071
147	OVC_Adj	785
148	OVC_Adj	946
149	OVC_Adj	3003
150	OVC_Adj	3531
151	PDAC_Adj	3279
152	PDAC_Adj	2175
153	PDAC_Adj	817
