# Supplementary material for: Single-cell analysis reveals the COL11A1+ fibroblasts are cancer-specific fibroblasts that promote tumor progression
Source: Front Pharmacol. 2023 Jan 20;14:1121586. doi: 10.3389/fphar.2023.1121586 (PMC9894880; doi:10.3389/fphar.2023.1121586)
Supplement: Supplementary file 2 [file Table3.XLSX]

## Sheet: Table S3
Supplementary Table S3. Top 50 differentially expressed genes of each cell population for multi-cancer
gene	p_val	avg_log2FC	pct.1	pct.2	p_val_adj	cluster
MS4A1	0	3.60066	0.826	0.01	0	B_cells
CD79A	0	3.37761	0.837	0.044	0	B_cells
CD79B	0	2.48909	0.673	0.068	0	B_cells
CD37	0	2.44701	0.903	0.337	0	B_cells
VPREB3	0	2.41795	0.574	0.008	0	B_cells
CD74	0	2.27379	0.99	0.653	0	B_cells
BANK1	0	2.12536	0.617	0.07	0	B_cells
IRF8	0	1.88809	0.547	0.082	0	B_cells
HLA-DQA1	0	1.86903	0.843	0.208	0	B_cells
LTB	0	1.85353	0.79	0.206	0	B_cells
HLA-DRA	0	1.79523	0.985	0.454	0	B_cells
CXCR4	0	1.77637	0.884	0.409	0	B_cells
HLA-DQB1	0	1.74654	0.848	0.273	0	B_cells
TCL1A	0	1.70718	0.192	0.002	0	B_cells
RP5-887A10.1	0	1.68995	0.297	0.006	0	B_cells
CD83	0	1.60804	0.448	0.136	0	B_cells
POU2F2	0	1.59842	0.501	0.102	0	B_cells
CD52	0	1.59479	0.911	0.378	0	B_cells
SMIM14	0	1.59457	0.59	0.333	0	B_cells
ARHGAP24	0	1.58508	0.453	0.065	0	B_cells
HLA-DPB1	0	1.57383	0.944	0.425	0	B_cells
ADAM28	0	1.52225	0.45	0.091	0	B_cells
HLA-DRB1	0	1.5118	0.936	0.439	0	B_cells
CD19	0	1.50807	0.392	0.008	0	B_cells
HLA-DPA1	0	1.49412	0.937	0.41	0	B_cells
2022-03-01	0	1.49196	0.473	0.082	0	B_cells
LINC00926	0	1.48038	0.366	0.016	0	B_cells
MEF2C	0	1.46591	0.576	0.196	0	B_cells
AL928768.3	0	1.4458	0.169	0.01	0	B_cells
BLK	0	1.43541	0.394	0.006	0	B_cells
FCRLA	0	1.36928	0.34	0.006	0	B_cells
RALGPS2	0	1.35198	0.377	0.109	0	B_cells
LAPTM5	0	1.33909	0.854	0.421	0	B_cells
TNFRSF13B	0	1.33276	0.316	0.007	0	B_cells
LY86	0	1.31231	0.439	0.089	0	B_cells
HVCN1	0	1.29994	0.351	0.059	0	B_cells
TNFRSF13C	0	1.29856	0.338	0.01	0	B_cells
CD22	0	1.26414	0.324	0.025	0	B_cells
SELL	0	1.25223	0.502	0.109	0	B_cells
HLA-DRB5	0	1.25056	0.465	0.215	0	B_cells
HLA-DQA2	0	1.22893	0.33	0.098	0	B_cells
IGHM	0	1.22586	0.348	0.044	0	B_cells
LIMD2	0	1.2249	0.639	0.296	0	B_cells
HLA-DMA	0	1.21998	0.665	0.281	0	B_cells
GPR183	0	1.19401	0.426	0.172	0	B_cells
FCMR	0	1.19198	0.344	0.059	0	B_cells
CD69	0	1.19083	0.572	0.238	0	B_cells
HLA-DMB	0	1.15838	0.524	0.171	0	B_cells
NCF1	0	1.15008	0.503	0.173	0	B_cells
CD53	0	1.13808	0.683	0.307	0	B_cells
IGKC	0	8.09549	0.719	0.356	0	B_Plasma_cells
IGLC2	0	7.75116	0.592	0.165	0	B_Plasma_cells
IGHG3	0	7.63393	0.601	0.138	0	B_Plasma_cells
IGLC3	0	7.18639	0.496	0.118	0	B_Plasma_cells
IGHG1	0	7.12576	0.604	0.122	0	B_Plasma_cells
IGHA1	0	7.08886	0.528	0.161	0	B_Plasma_cells
IGLL5	0	7.07206	0.472	0.052	0	B_Plasma_cells
JCHAIN	0	6.70903	0.669	0.062	0	B_Plasma_cells
IGJ	0	6.43035	0.223	0.029	0	B_Plasma_cells
IGHG4	0	6.28212	0.561	0.12	0	B_Plasma_cells
IGKV3-20	0	5.63237	0.176	0.02	0	B_Plasma_cells
IGHGP	0	5.54023	0.426	0.012	0	B_Plasma_cells
IGHG2	0	5.23867	0.491	0.024	0	B_Plasma_cells
IGHM	0	5.07196	0.326	0.046	0	B_Plasma_cells
IGHV3-23	0	4.78401	0.125	0.013	0	B_Plasma_cells
IGKV3-15	0	4.72001	0.104	0.007	0	B_Plasma_cells
IGLV3-1	0	4.70337	0.354	0.007	0	B_Plasma_cells
IGKV1-5	0	4.69677	0.186	0.011	0	B_Plasma_cells
MZB1	0	4.65768	0.948	0.054	0	B_Plasma_cells
IGLV2-14	0	4.62055	0.102	0.011	0	B_Plasma_cells
IGKV4-1	0	4.61507	0.202	0.016	0	B_Plasma_cells
IGKV3-11	0	4.61362	0.114	0.008	0	B_Plasma_cells
IGHA2	0	4.2237	0.23	0.012	0	B_Plasma_cells
IGKV1-12	0	4.02879	0.303	0.006	0	B_Plasma_cells
DERL3	0	3.7898	0.89	0.042	0	B_Plasma_cells
IGLC7	0	3.69872	0.117	0.007	0	B_Plasma_cells
SSR4	0	3.23434	0.975	0.758	0	B_Plasma_cells
IGLV6-57	0	3.10727	0.248	0.004	0	B_Plasma_cells
XBP1	0	3.03794	0.94	0.483	0	B_Plasma_cells
FKBP11	0	2.81058	0.911	0.242	0	B_Plasma_cells
SEC11C	0	2.43071	0.905	0.361	0	B_Plasma_cells
HERPUD1	0	2.40392	0.948	0.552	0	B_Plasma_cells
CD79A	0	2.09679	0.857	0.047	0	B_Plasma_cells
PRDX4	0	2.08071	0.883	0.382	0	B_Plasma_cells
ITM2C	0	1.99032	0.86	0.289	0	B_Plasma_cells
TNFRSF17	0	1.73063	0.687	0.004	0	B_Plasma_cells
PIM2	0	1.7242	0.781	0.107	0	B_Plasma_cells
FKBP2	0	1.68234	0.91	0.538	0	B_Plasma_cells
RP11-731F5.2	0	1.68023	0.114	0.003	0	B_Plasma_cells
HSP90B1	0	1.62383	0.939	0.648	0	B_Plasma_cells
SPCS3	0	1.62233	0.867	0.379	0	B_Plasma_cells
FCRL5	0	1.60548	0.695	0.007	0	B_Plasma_cells
SDF2L1	0	1.46397	0.845	0.35	0	B_Plasma_cells
SPCS2	0	1.42198	0.929	0.572	0	B_Plasma_cells
JSRP1	0	1.41075	0.462	0.012	0	B_Plasma_cells
FAM46C	0	1.36893	0.717	0.082	0	B_Plasma_cells
UBE2J1	0	1.27985	0.79	0.298	0	B_Plasma_cells
ERLEC1	0	1.27599	0.809	0.353	0	B_Plasma_cells
SSR3	0	1.26709	0.892	0.524	0	B_Plasma_cells
BTG2	0	1.23481	0.845	0.449	0	B_Plasma_cells
IL7R	0	2.69557	0.698	0.112	0	CD4+T_cells
LTB	0	2.61223	0.728	0.153	0	CD4+T_cells
IL32	0	1.90499	0.842	0.413	0	CD4+T_cells
CD3E	0	1.8284	0.753	0.135	0	CD4+T_cells
TRAC	0	1.77889	0.558	0.126	0	CD4+T_cells
CD3D	0	1.75805	0.803	0.157	0	CD4+T_cells
KLRB1	0	1.71	0.344	0.076	0	CD4+T_cells
CD2	0	1.68755	0.74	0.149	0	CD4+T_cells
TRBC1	0	1.64694	0.39	0.086	0	CD4+T_cells
SPOCK2	0	1.6379	0.559	0.113	0	CD4+T_cells
CXCR4	0	1.61438	0.789	0.373	0	CD4+T_cells
TRBC2	0	1.60137	0.487	0.112	0	CD4+T_cells
TNFRSF4	0	1.54627	0.248	0.059	0	CD4+T_cells
CD69	0	1.41639	0.601	0.198	0	CD4+T_cells
CD52	0	1.41098	0.84	0.332	0	CD4+T_cells
BTG1	0	1.40495	0.93	0.796	0	CD4+T_cells
SARAF	0	1.38397	0.643	0.505	0	CD4+T_cells
CD3G	0	1.38161	0.544	0.094	0	CD4+T_cells
PTPRC	0	1.37614	0.788	0.319	0	CD4+T_cells
LCK	0	1.35095	0.552	0.114	0	CD4+T_cells
ZFP36L2	0	1.35082	0.736	0.611	0	CD4+T_cells
PIK3IP1	0	1.32958	0.507	0.202	0	CD4+T_cells
CCR7	0	1.27201	0.312	0.034	0	CD4+T_cells
IL2RG	0	1.26687	0.588	0.235	0	CD4+T_cells
CYTIP	0	1.25613	0.586	0.221	0	CD4+T_cells
TSC22D3	0	1.24711	0.799	0.624	0	CD4+T_cells
CD27	0	1.24113	0.443	0.104	0	CD4+T_cells
CORO1A	0	1.24103	0.732	0.314	0	CD4+T_cells
BATF	0	1.23795	0.302	0.124	0	CD4+T_cells
ACAP1	0	1.23302	0.574	0.196	0	CD4+T_cells
BIRC3	0	1.20582	0.454	0.232	0	CD4+T_cells
TRAF3IP3	0	1.19056	0.467	0.132	0	CD4+T_cells
CD7	0	1.17674	0.549	0.156	0	CD4+T_cells
LAT	0	1.17657	0.429	0.114	0	CD4+T_cells
EVL	0	1.17515	0.648	0.331	0	CD4+T_cells
FYB	0	1.16639	0.602	0.243	0	CD4+T_cells
ETS1	0	1.16618	0.468	0.201	0	CD4+T_cells
GIMAP7	0	1.16613	0.481	0.173	0	CD4+T_cells
LEPROTL1	0	1.15607	0.551	0.36	0	CD4+T_cells
FXYD5	0	1.14677	0.734	0.55	0	CD4+T_cells
RORA	0	1.1366	0.372	0.158	0	CD4+T_cells
LIMD2	0	1.13456	0.555	0.272	0	CD4+T_cells
CD48	0	1.12671	0.555	0.215	0	CD4+T_cells
ARHGDIB	0	1.12607	0.817	0.523	0	CD4+T_cells
TNFRSF18	0	1.115	0.219	0.071	0	CD4+T_cells
TIGIT	0	1.09352	0.274	0.063	0	CD4+T_cells
STK4	0	1.08978	0.578	0.36	0	CD4+T_cells
RGS1	0	1.05715	0.506	0.294	0	CD4+T_cells
2022-09-06	0	1.044	0.461	0.242	0	CD4+T_cells
RAC2	0	1.04236	0.635	0.329	0	CD4+T_cells
GNLY	0	4.75869	0.449	0.051	0	CD8+T_cells
CCL5	0	4.26327	0.918	0.126	0	CD8+T_cells
NKG7	0	4.16969	0.816	0.082	0	CD8+T_cells
GZMB	0	3.90564	0.593	0.044	0	CD8+T_cells
CCL4	0	3.84415	0.768	0.145	0	CD8+T_cells
GZMA	0	3.82668	0.814	0.068	0	CD8+T_cells
CXCL13	0	3.09795	0.256	0.025	0	CD8+T_cells
CTSW	0	2.81785	0.676	0.062	0	CD8+T_cells
PRF1	0	2.73742	0.574	0.032	0	CD8+T_cells
GZMH	0	2.67632	0.481	0.022	0	CD8+T_cells
GZMK	0	2.66012	0.423	0.042	0	CD8+T_cells
CD7	0	2.63948	0.713	0.135	0	CD8+T_cells
CCL4L2	0	2.61042	0.3	0.053	0	CD8+T_cells
KLRD1	0	2.57211	0.459	0.022	0	CD8+T_cells
CD8A	0	2.51984	0.523	0.033	0	CD8+T_cells
CD3D	0	2.46598	0.775	0.165	0	CD8+T_cells
CST7	0	2.45908	0.697	0.106	0	CD8+T_cells
CD2	0	2.40051	0.794	0.145	0	CD8+T_cells
IFNG	0	2.27503	0.321	0.014	0	CD8+T_cells
TRAC	0	2.25964	0.582	0.125	0	CD8+T_cells
HCST	0	2.18125	0.838	0.278	0	CD8+T_cells
CD3E	0	2.08936	0.739	0.141	0	CD8+T_cells
CD8B	0	2.03244	0.418	0.029	0	CD8+T_cells
TRBC1	0	2.02004	0.454	0.079	0	CD8+T_cells
TRBC2	0	2.00981	0.536	0.107	0	CD8+T_cells
IL32	0	1.98154	0.867	0.412	0	CD8+T_cells
APOBEC3G	0	1.90957	0.533	0.139	0	CD8+T_cells
LAG3	0	1.89359	0.345	0.047	0	CD8+T_cells
KLRB1	0	1.89307	0.369	0.075	0	CD8+T_cells
CCL3	0	1.88601	0.298	0.117	0	CD8+T_cells
CD52	0	1.8843	0.86	0.333	0	CD8+T_cells
AC092580.4	0	1.82586	0.392	0.033	0	CD8+T_cells
EVL	0	1.77844	0.732	0.321	0	CD8+T_cells
CD3G	0	1.75672	0.535	0.098	0	CD8+T_cells
CORO1A	0	1.74973	0.795	0.307	0	CD8+T_cells
XCL2	0	1.71815	0.243	0.009	0	CD8+T_cells
CXCR4	0	1.7153	0.777	0.377	0	CD8+T_cells
LCK	0	1.66741	0.582	0.113	0	CD8+T_cells
CD69	0	1.66516	0.667	0.191	0	CD8+T_cells
CD247	0	1.65064	0.462	0.076	0	CD8+T_cells
DUSP2	0	1.64324	0.431	0.158	0	CD8+T_cells
XCL1	0	1.62434	0.201	0.012	0	CD8+T_cells
GZMM	0	1.61924	0.443	0.054	0	CD8+T_cells
ID2	0	1.61143	0.69	0.444	0	CD8+T_cells
IL2RG	0	1.58007	0.637	0.23	0	CD8+T_cells
RAC2	0	1.57606	0.707	0.321	0	CD8+T_cells
PTPRC	0	1.57033	0.81	0.319	0	CD8+T_cells
KLRC1	0	1.54568	0.177	0.005	0	CD8+T_cells
RGS1	0	1.52433	0.586	0.284	0	CD8+T_cells
CD96	0	1.51369	0.45	0.066	0	CD8+T_cells
CLDN5	0	3.71487	0.703	0.018	0	Endothelial_cells
RAMP2	0	3.64372	0.907	0.052	0	Endothelial_cells
VWF	0	3.4021	0.741	0.021	0	Endothelial_cells
PLVAP	0	3.39021	0.744	0.016	0	Endothelial_cells
GNG11	0	3.27778	0.913	0.118	0	Endothelial_cells
SPARCL1	0	3.18184	0.861	0.126	0	Endothelial_cells
SLC9A3R2	0	3.00232	0.701	0.166	0	Endothelial_cells
AQP1	0	2.99931	0.728	0.043	0	Endothelial_cells
A2M	0	2.98372	0.884	0.158	0	Endothelial_cells
HSPG2	0	2.97879	0.84	0.158	0	Endothelial_cells
FABP4	0	2.91131	0.281	0.039	0	Endothelial_cells
ACKR1	0	2.83798	0.254	0.009	0	Endothelial_cells
CLEC14A	0	2.78881	0.786	0.007	0	Endothelial_cells
SPRY1	0	2.77263	0.672	0.179	0	Endothelial_cells
EGFL7	0	2.69876	0.807	0.083	0	Endothelial_cells
ENG	0	2.69438	0.832	0.146	0	Endothelial_cells
ID1	0	2.58341	0.784	0.213	0	Endothelial_cells
PECAM1	0	2.41374	0.545	0.066	0	Endothelial_cells
COL4A1	0	2.41159	0.677	0.11	0	Endothelial_cells
EMCN	0	2.39867	0.741	0.007	0	Endothelial_cells
CAV1	0	2.39804	0.792	0.179	0	Endothelial_cells
RAMP3	0	2.39354	0.631	0.008	0	Endothelial_cells
RBP7	0	2.36955	0.489	0.043	0	Endothelial_cells
EPAS1	0	2.34753	0.797	0.158	0	Endothelial_cells
CRIP2	0	2.32261	0.861	0.24	0	Endothelial_cells
FLT1	0	2.31603	0.611	0.022	0	Endothelial_cells
HYAL2	0	2.31413	0.735	0.139	0	Endothelial_cells
INSR	0	2.30174	0.582	0.165	0	Endothelial_cells
TM4SF1	0	2.29661	0.882	0.295	0	Endothelial_cells
IGFBP7	0	2.28979	0.938	0.305	0	Endothelial_cells
ESAM	0	2.23456	0.747	0.039	0	Endothelial_cells
CD93	0	2.20116	0.733	0.065	0	Endothelial_cells
IFI27	0	2.19345	0.943	0.354	0	Endothelial_cells
PODXL	0	2.18937	0.643	0.058	0	Endothelial_cells
TCF4	0	2.18377	0.836	0.213	0	Endothelial_cells
ID3	0	2.17473	0.823	0.282	0	Endothelial_cells
FCN3	0	2.15415	0.265	0.008	0	Endothelial_cells
CD34	0	2.1249	0.659	0.015	0	Endothelial_cells
CALCRL	0	2.10952	0.666	0.02	0	Endothelial_cells
ADGRL4	0	2.03157	0.488	0.004	0	Endothelial_cells
IGFBP3	0	2.02685	0.36	0.137	0	Endothelial_cells
RGCC	0	2.02066	0.476	0.236	0	Endothelial_cells
PTPRB	0	2.00684	0.658	0.013	0	Endothelial_cells
GSN	0	2.0051	0.854	0.382	0	Endothelial_cells
STC1	0	1.99359	0.339	0.026	0	Endothelial_cells
COL4A2	0	1.97595	0.636	0.131	0	Endothelial_cells
CDH5	0	1.97361	0.666	0.006	0	Endothelial_cells
PTRF	0	1.9456	0.799	0.193	0	Endothelial_cells
SDPR	0	1.94121	0.562	0.043	0	Endothelial_cells
COL15A1	0	1.94015	0.436	0.04	0	Endothelial_cells
KLK3	0	4.02236	0.287	0.055	0	Epithelial_cells
KLK2	0	3.3829	0.286	0.047	0	Epithelial_cells
KRT19	0	3.27472	0.76	0.145	0	Epithelial_cells
KRT18	0	2.96299	0.915	0.184	0	Epithelial_cells
TFF3	0	2.86388	0.452	0.081	0	Epithelial_cells
FXYD3	0	2.86151	0.725	0.08	0	Epithelial_cells
KRT8	0	2.85679	0.903	0.166	0	Epithelial_cells
LCN2	0	2.6843	0.361	0.062	0	Epithelial_cells
KRT7	0	2.54688	0.498	0.079	0	Epithelial_cells
AGR2	0	2.52552	0.523	0.063	0	Epithelial_cells
MSMB	0	2.52406	0.237	0.029	0	Epithelial_cells
WFDC2	0	2.52252	0.448	0.094	0	Epithelial_cells
SLPI	0	2.48324	0.516	0.1	0	Epithelial_cells
TFF1	0	2.45538	0.196	0.024	0	Epithelial_cells
CLDN4	0	2.44804	0.73	0.065	0	Epithelial_cells
TACSTD2	0	2.40793	0.661	0.063	0	Epithelial_cells
S100P	0	2.38981	0.343	0.055	0	Epithelial_cells
ELF3	0	2.35264	0.714	0.054	0	Epithelial_cells
TSPAN1	0	2.29461	0.593	0.037	0	Epithelial_cells
C19orf33	0	2.22368	0.48	0.06	0	Epithelial_cells
S100A2	0	2.18063	0.257	0.046	0	Epithelial_cells
EPCAM	0	2.18063	0.763	0.061	0	Epithelial_cells
PDLIM5	0	2.17805	0.574	0.249	0	Epithelial_cells
SPINK1	0	2.14218	0.213	0.033	0	Epithelial_cells
AZGP1	0	2.1398	0.45	0.032	0	Epithelial_cells
SPINT2	0	2.01795	0.853	0.265	0	Epithelial_cells
SMIM22	0	1.943	0.686	0.038	0	Epithelial_cells
MGST1	0	1.93214	0.707	0.118	0	Epithelial_cells
GDF15	0	1.91367	0.433	0.049	0	Epithelial_cells
MUC1	0	1.87734	0.413	0.058	0	Epithelial_cells
PERP	0	1.84707	0.778	0.143	0	Epithelial_cells
CD24	0	1.83046	0.431	0.087	0	Epithelial_cells
SPON2	0	1.76794	0.332	0.171	0	Epithelial_cells
PSCA	0	1.75641	0.172	0.013	0	Epithelial_cells
ACPP	0	1.75299	0.226	0.021	0	Epithelial_cells
CLDN3	0	1.75164	0.578	0.04	0	Epithelial_cells
SFN	0	1.7487	0.464	0.029	0	Epithelial_cells
TRGC1	0	1.73045	0.259	0.043	0	Epithelial_cells
S100A14	0	1.71998	0.44	0.03	0	Epithelial_cells
H2AFJ	0	1.71153	0.754	0.362	0	Epithelial_cells
KRT17	0	1.6966	0.231	0.043	0	Epithelial_cells
TSPAN8	0	1.68943	0.372	0.037	0	Epithelial_cells
MMP7	0	1.66212	0.284	0.04	0	Epithelial_cells
TRPM4	0	1.65009	0.384	0.058	0	Epithelial_cells
MAL2	0	1.63215	0.604	0.027	0	Epithelial_cells
PHGR1	0	1.62217	0.174	0.036	0	Epithelial_cells
AKR1C2	0	1.5651	0.14	0.024	0	Epithelial_cells
S100A6	0	1.56145	0.723	0.883	0	Epithelial_cells
CEACAM6	0	1.54264	0.246	0.017	0	Epithelial_cells
RDH11	0	1.52903	0.457	0.186	0	Epithelial_cells
COL1A1	0	5.83649	0.922	0.178	0	Fibroblasts
COL1A2	0	5.42214	0.933	0.151	0	Fibroblasts
COL3A1	0	5.22376	0.898	0.133	0	Fibroblasts
LUM	0	4.7375	0.879	0.082	0	Fibroblasts
DCN	0	4.65457	0.937	0.089	0	Fibroblasts
SFRP2	0	4.02037	0.538	0.027	0	Fibroblasts
SPARC	0	3.59687	0.931	0.21	0	Fibroblasts
MMP11	0	3.58683	0.441	0.038	0	Fibroblasts
FN1	0	3.54908	0.829	0.213	0	Fibroblasts
COL6A3	0	3.40096	0.812	0.074	0	Fibroblasts
COL6A2	0	3.37558	0.911	0.127	0	Fibroblasts
AEBP1	0	3.34713	0.813	0.071	0	Fibroblasts
CTHRC1	0	3.32081	0.742	0.101	0	Fibroblasts
COL6A1	0	3.28528	0.88	0.135	0	Fibroblasts
RARRES2	0	3.26595	0.867	0.131	0	Fibroblasts
CCDC80	0	3.18491	0.792	0.076	0	Fibroblasts
POSTN	0	3.01938	0.533	0.038	0	Fibroblasts
MMP2	0	2.9774	0.801	0.09	0	Fibroblasts
C1S	0	2.97687	0.859	0.1	0	Fibroblasts
BGN	0	2.95283	0.834	0.113	0	Fibroblasts
COL5A2	0	2.84828	0.758	0.06	0	Fibroblasts
PTGDS	0	2.83754	0.454	0.063	0	Fibroblasts
IGFBP5	0	2.79705	0.662	0.085	0	Fibroblasts
APOD	0	2.78956	0.363	0.049	0	Fibroblasts
SERPINF1	0	2.76645	0.757	0.106	0	Fibroblasts
TIMP1	0	2.73769	0.946	0.52	0	Fibroblasts
C1R	0	2.68641	0.833	0.116	0	Fibroblasts
SFRP4	0	2.68317	0.415	0.012	0	Fibroblasts
MGP	0	2.65856	0.73	0.209	0	Fibroblasts
FBLN1	0	2.64156	0.714	0.065	0	Fibroblasts
CTSK	0	2.63356	0.723	0.047	0	Fibroblasts
COL5A1	0	2.62394	0.712	0.046	0	Fibroblasts
CXCL14	0	2.52818	0.347	0.042	0	Fibroblasts
CALD1	0	2.51686	0.96	0.26	0	Fibroblasts
PCOLCE	0	2.49844	0.797	0.073	0	Fibroblasts
THBS2	0	2.49433	0.656	0.023	0	Fibroblasts
COL12A1	0	2.44105	0.55	0.066	0	Fibroblasts
THY1	0	2.33436	0.725	0.068	0	Fibroblasts
TIMP3	0	2.28642	0.649	0.156	0	Fibroblasts
LGALS1	0	2.28539	0.974	0.573	0	Fibroblasts
MEG3	0	2.28122	0.719	0.046	0	Fibroblasts
ISLR	0	2.25942	0.685	0.035	0	Fibroblasts
VCAN	0	2.24755	0.761	0.124	0	Fibroblasts
C3	0	2.21719	0.48	0.123	0	Fibroblasts
SERPING1	0	2.15706	0.859	0.201	0	Fibroblasts
CTGF	0	2.14124	0.541	0.111	0	Fibroblasts
NNMT	0	2.10521	0.751	0.167	0	Fibroblasts
IGFBP4	0	2.09333	0.752	0.193	0	Fibroblasts
MFAP4	0	2.08199	0.632	0.029	0	Fibroblasts
COL11A1	0	2.06279	0.34	0.012	0	Fibroblasts
APOC1	0	4.74828	0.771	0.177	0	Macrophages
CCL18	0	4.41616	0.354	0.034	0	Macrophages
APOE	0	4.37674	0.778	0.244	0	Macrophages
C1QB	0	4.26839	0.717	0.094	0	Macrophages
C1QA	0	4.1732	0.749	0.096	0	Macrophages
FTL	0	3.79101	0.997	0.975	0	Macrophages
C1QC	0	3.72584	0.707	0.055	0	Macrophages
SPP1	0	3.54597	0.601	0.179	0	Macrophages
TYROBP	0	3.23653	0.973	0.195	0	Macrophages
CTSD	0	3.15685	0.905	0.575	0	Macrophages
CTSB	0	3.15429	0.882	0.485	0	Macrophages
CD68	0	3.01768	0.845	0.159	0	Macrophages
FCER1G	0	2.99042	0.934	0.162	0	Macrophages
RNASE1	0	2.87898	0.575	0.188	0	Macrophages
GPNMB	0	2.86049	0.721	0.118	0	Macrophages
HLA-DRA	0	2.81379	0.891	0.427	0	Macrophages
AIF1	0	2.74139	0.904	0.114	0	Macrophages
CD14	0	2.67883	0.746	0.093	0	Macrophages
CTSL	0	2.63899	0.753	0.283	0	Macrophages
LYZ	0	2.56075	0.888	0.195	0	Macrophages
PSAP	0	2.53646	0.931	0.648	0	Macrophages
MS4A7	0	2.48839	0.735	0.055	0	Macrophages
HLA-DPA1	0	2.46815	0.849	0.383	0	Macrophages
GLUL	0	2.45106	0.921	0.457	0	Macrophages
S100A8	0	2.3926	0.546	0.101	0	Macrophages
MS4A6A	0	2.36968	0.697	0.074	0	Macrophages
HLA-DRB1	0	2.35451	0.86	0.413	0	Macrophages
CTSZ	0	2.35229	0.802	0.336	0	Macrophages
FCGR3A	0	2.33331	0.734	0.059	0	Macrophages
CSTB	0	2.30493	0.876	0.675	0	Macrophages
HLA-DPB1	0	2.2752	0.847	0.4	0	Macrophages
CD74	0	2.26283	0.904	0.639	0	Macrophages
FCGR2A	0	2.25589	0.753	0.07	0	Macrophages
CTSS	0	2.24379	0.89	0.281	0	Macrophages
S100A9	0	2.21011	0.762	0.174	0	Macrophages
CSF3R	0	2.18453	0.394	0.052	0	Macrophages
MARCO	0	2.15121	0.404	0.028	0	Macrophages
HLA-DQA1	0	2.1461	0.741	0.174	0	Macrophages
PLIN2	0	2.1352	0.668	0.231	0	Macrophages
FTH1	0	2.09819	0.999	0.983	0	Macrophages
GRN	0	2.08375	0.852	0.459	0	Macrophages
GPX1	0	2.06285	0.884	0.648	0	Macrophages
HLA-DQB1	0	2.06248	0.787	0.24	0	Macrophages
SOD2	0	2.01102	0.808	0.397	0	Macrophages
MNDA	0	2.00975	0.623	0.066	0	Macrophages
HLA-DRB5	0	1.99823	0.596	0.183	0	Macrophages
SPI1	0	1.99175	0.791	0.089	0	Macrophages
SLC11A1	0	1.98858	0.629	0.071	0	Macrophages
MS4A4A	0	1.98154	0.634	0.033	0	Macrophages
NPC2	0	1.97774	0.891	0.566	0	Macrophages
TPSAB1	0	7.77845	0.965	0.024	0	Mast_cells
TPSB2	0	7.2208	0.637	0.028	0	Mast_cells
CPA3	0	5.37182	0.949	0.007	0	Mast_cells
MS4A2	0	3.45413	0.819	0.002	0	Mast_cells
HPGDS	0	3.3172	0.804	0.019	0	Mast_cells
KIT	0	3.19495	0.812	0.012	0	Mast_cells
GATA2	0	3.03195	0.81	0.084	0	Mast_cells
LTC4S	0	2.93451	0.755	0.097	0	Mast_cells
VWA5A	0	2.80652	0.741	0.065	0	Mast_cells
SLC18A2	0	2.78632	0.752	0.004	0	Mast_cells
HPGD	0	2.66689	0.605	0.082	0	Mast_cells
RGS13	0	2.57603	0.687	0.007	0	Mast_cells
CTSG	0	2.4565	0.191	0.002	0	Mast_cells
IL1RL1	0	2.40463	0.649	0.008	0	Mast_cells
CD69	0	2.38481	0.798	0.238	0	Mast_cells
C1orf186	0	2.30692	0.646	0.054	0	Mast_cells
AREG	0	2.23516	0.539	0.161	0	Mast_cells
SAMSN1	0	2.2134	0.798	0.208	0	Mast_cells
RP11-354E11.2	0	2.1046	0.613	0.002	0	Mast_cells
RGS1	0	2.0667	0.868	0.309	0	Mast_cells
HDC	0	1.9353	0.441	0.002	0	Mast_cells
LMO4	0	1.79088	0.673	0.307	0	Mast_cells
CLU	0	1.76933	0.8	0.274	0	Mast_cells
ACSL4	0	1.74835	0.601	0.145	0	Mast_cells
ALOX5AP	0	1.73596	0.825	0.275	0	Mast_cells
FOSB	0	1.72878	0.804	0.529	0	Mast_cells
MAOB	0	1.68473	0.549	0.042	0	Mast_cells
ANXA1	0	1.66484	0.89	0.548	0	Mast_cells
RGS2	0	1.65083	0.725	0.309	0	Mast_cells
CAPG	0	1.62769	0.747	0.355	0	Mast_cells
PTGS1	0	1.62333	0.51	0.064	0	Mast_cells
SOCS1	0	1.62187	0.521	0.178	0	Mast_cells
CD9	0	1.60718	0.855	0.497	0	Mast_cells
TPSD1	0	1.56632	0.245	0.001	0	Mast_cells
ADCYAP1	0	1.4984	0.165	0.003	0	Mast_cells
SRGN	0	1.48088	0.948	0.559	0	Mast_cells
BTK	0	1.44671	0.508	0.065	0	Mast_cells
GPR65	0	1.44081	0.478	0.128	0	Mast_cells
LAPTM4A	0	1.43374	0.852	0.614	0	Mast_cells
FCER1G	0	1.42803	0.869	0.225	0	Mast_cells
NFKBIZ	0	1.37377	0.578	0.337	0	Mast_cells
ARHGEF6	0	1.34731	0.492	0.087	0	Mast_cells
NFKBIA	0	1.32859	0.86	0.645	0	Mast_cells
ALOX5	0	1.31154	0.491	0.123	0	Mast_cells
FOXP1	0	1.31135	0.726	0.43	0	Mast_cells
ARHGAP18	0	1.31081	0.582	0.226	0	Mast_cells
NSMCE1	0	1.30142	0.544	0.323	0	Mast_cells
GRAP2	0	1.28928	0.471	0.051	0	Mast_cells
CNRIP1	0	1.26874	0.424	0.068	0	Mast_cells
ADRB2	0	1.26473	0.431	0.082	0	Mast_cells
S100A8	0	3.80457	0.601	0.116	0	Monocytes
S100A9	0	3.74012	0.714	0.201	0	Monocytes
LYZ	0	3.31088	0.895	0.223	0	Monocytes
AIF1	0	2.6638	0.892	0.147	0	Monocytes
LST1	0	2.66187	0.879	0.131	0	Monocytes
HLA-DPB1	0	2.59663	0.816	0.42	0	Monocytes
IL1B	0	2.593	0.49	0.053	0	Monocytes
HLA-DRA	0	2.56989	0.877	0.447	0	Monocytes
FCN1	0	2.56237	0.486	0.026	0	Monocytes
MNDA	0	2.54408	0.721	0.082	0	Monocytes
HLA-DPA1	0	2.45318	0.819	0.404	0	Monocytes
G0S2	0	2.44918	0.341	0.109	0	Monocytes
S100A12	0	2.40199	0.296	0.011	0	Monocytes
TYROBP	0	2.40057	0.951	0.228	0	Monocytes
HLA-DRB1	0	2.32991	0.847	0.432	0	Monocytes
CTSS	0	2.27289	0.88	0.306	0	Monocytes
HLA-DQB1	0	2.22704	0.757	0.264	0	Monocytes
HLA-DQA1	0	2.2103	0.663	0.203	0	Monocytes
CSF3R	0	2.19893	0.49	0.059	0	Monocytes
FCER1G	0	2.13581	0.884	0.197	0	Monocytes
CD74	0	2.10236	0.893	0.65	0	Monocytes
NAMPT	0	2.05515	0.729	0.366	0	Monocytes
MS4A6A	0	2.03863	0.692	0.1	0	Monocytes
HLA-DRB5	0	2.00813	0.573	0.201	0	Monocytes
CST3	0	1.99907	0.883	0.64	0	Monocytes
BCL2A1	0	1.992	0.645	0.108	0	Monocytes
IL8	0	1.98256	0.221	0.093	0	Monocytes
FCGR3B	0	1.97912	0.124	0.017	0	Monocytes
SPI1	0	1.97684	0.797	0.118	0	Monocytes
FGL2	0	1.95094	0.671	0.098	0	Monocytes
CXCL10	0	1.94785	0.106	0.03	0	Monocytes
FPR1	0	1.89468	0.584	0.053	0	Monocytes
COTL1	0	1.86424	0.87	0.408	0	Monocytes
SRGN	0	1.84147	0.962	0.542	0	Monocytes
TYMP	0	1.83009	0.877	0.431	0	Monocytes
SOD2	0	1.80716	0.753	0.417	0	Monocytes
C15orf48	0	1.77383	0.481	0.189	0	Monocytes
CD14	0	1.73761	0.599	0.129	0	Monocytes
RGS2	0	1.70664	0.72	0.292	0	Monocytes
RP11-1143G9.4	0	1.6858	0.445	0.072	0	Monocytes
C1orf162	0	1.68069	0.709	0.139	0	Monocytes
GCA	0	1.6174	0.603	0.19	0	Monocytes
NCF2	0	1.60566	0.608	0.082	0	Monocytes
VCAN	0	1.59491	0.434	0.168	0	Monocytes
PLAUR	0	1.58184	0.669	0.251	0	Monocytes
CYBB	0	1.57962	0.591	0.086	0	Monocytes
CPVL	0	1.57133	0.521	0.106	0	Monocytes
FAM26F	0	1.56013	0.532	0.075	0	Monocytes
CXCL8	0	1.54309	0.189	0.085	0	Monocytes
ITGB2	0	1.5056	0.803	0.268	0	Monocytes
RGS5	0	4.52986	0.793	0.054	0	Pericytes
ACTA2	0	4.4749	0.887	0.148	0	Pericytes
TAGLN	0	4.27401	0.9	0.18	0	Pericytes
MYL9	0	3.83822	0.947	0.213	0	Pericytes
IGFBP7	0	3.61876	0.968	0.323	0	Pericytes
TPM2	0	3.46119	0.936	0.204	0	Pericytes
NDUFA4L2	0	3.39673	0.773	0.051	0	Pericytes
CALD1	0	3.31603	0.981	0.3	0	Pericytes
ADIRF	0	3.20964	0.832	0.234	0	Pericytes
SPARCL1	0	3.14646	0.885	0.147	0	Pericytes
MYH11	0	3.09784	0.578	0.024	0	Pericytes
SOD3	0	2.92935	0.778	0.119	0	Pericytes
C11orf96	0	2.83445	0.612	0.086	0	Pericytes
PPP1R14A	0	2.74386	0.765	0.062	0	Pericytes
COL18A1	0	2.5253	0.778	0.181	0	Pericytes
BGN	0	2.52182	0.868	0.154	0	Pericytes
PDGFRB	0	2.47077	0.771	0.074	0	Pericytes
NOTCH3	0	2.46669	0.773	0.087	0	Pericytes
COL4A1	0	2.45664	0.694	0.126	0	Pericytes
LHFP	0	2.42093	0.767	0.09	0	Pericytes
MYLK	0	2.37981	0.728	0.095	0	Pericytes
TPM1	0	2.37041	0.903	0.388	0	Pericytes
COL4A2	0	2.36976	0.741	0.142	0	Pericytes
MFGE8	0	2.32743	0.82	0.176	0	Pericytes
PLAC9	0	2.30287	0.718	0.063	0	Pericytes
HIGD1B	0	2.30209	0.516	0.011	0	Pericytes
CSRP2	0	2.29213	0.693	0.095	0	Pericytes
MCAM	0	2.27922	0.693	0.06	0	Pericytes
MAP1B	0	2.18953	0.763	0.118	0	Pericytes
FRZB	0	2.12132	0.626	0.042	0	Pericytes
DSTN	0	2.08594	0.914	0.616	0	Pericytes
SPARC	0	2.07067	0.913	0.253	0	Pericytes
COX4I2	0	2.06622	0.542	0.014	0	Pericytes
PRKCDBP	0	2.03662	0.757	0.194	0	Pericytes
CRISPLD2	0	1.94821	0.62	0.089	0	Pericytes
PTP4A3	0	1.93783	0.619	0.115	0	Pericytes
TINAGL1	0	1.92969	0.699	0.145	0	Pericytes
THY1	0	1.92386	0.491	0.115	0	Pericytes
CAV1	0	1.90813	0.82	0.196	0	Pericytes
TPPP3	0	1.89193	0.583	0.066	0	Pericytes
GPX3	0	1.89021	0.611	0.156	0	Pericytes
GJA4	0	1.89	0.593	0.033	0	Pericytes
TIMP1	0	1.88724	0.901	0.547	0	Pericytes
IGFBP5	0	1.86995	0.587	0.122	0	Pericytes
MGP	0	1.8528	0.881	0.234	0	Pericytes
PLN	0	1.82885	0.378	0.009	0	Pericytes
COL6A2	0	1.81587	0.794	0.178	0	Pericytes
ADAMTS4	0	1.80676	0.465	0.048	0	Pericytes
CRIP1	0	1.79057	0.703	0.362	0	Pericytes
ID3	0	1.78111	0.757	0.301	0	Pericytes
