# Supplementary material for: Single-cell analysis reveals the COL11A1+ fibroblasts are cancer-specific fibroblasts that promote tumor progression
Source: Front Pharmacol. 2023 Jan 20;14:1121586. doi: 10.3389/fphar.2023.1121586 (PMC9894880; doi:10.3389/fphar.2023.1121586)
Supplement: Supplementary file 3 [file Table9.XLSX]

## Sheet: Table S9
Supplementary Table S9: Baseline characteristics of enrolled bladder cancer patients
Viable	Cases
sex
F	7 (15.6%)
M	38 (84.4%)
age
<60	12 (27.3%)
>=60	32 (72.7%)
Tumor (of TNM)
Tis	3 (6.67%)
T1	6 (13.3%)
T2	7 (15.6%)
T3	24 (53.3%)
T4	3 (6.67%)
NA	2 (4.44%)
Regional Lymph Nodes (of TNM)
N0	34 (75.6%)
N1,N2,M3	4 (8.89%)
Nx	7 (15.6%)
Distant metastasis (of TNM)
M0	45 (100%)
AJCC_stage:
0is	3 (6.67%)
I	3 (6.67%)
II	7 (15.6%)
III	20 (44.4%)
III-IV	3 (6.67%)
IV	4 (8.89%)
NA	5 (11.11%)
