# Supplementary material for: Single-cell analysis reveals the COL11A1+ fibroblasts are cancer-specific fibroblasts that promote tumor progression
Source: Front Pharmacol. 2023 Jan 20;14:1121586. doi: 10.3389/fphar.2023.1121586 (PMC9894880; doi:10.3389/fphar.2023.1121586)
Supplement: Supplementary file 4 [file Table6.XLSX]

## Sheet: Table S6
Supplementary Table S6: Cell numbers of COL11A1+FBs from each tissue origin
Tissue origin	Cell number of COL11A1+FBs
2019_HCC_ICC	74
2020_BC	2137
2020_CRC	1088
2020_CRC_Adj	39
2020_ICC	376
2020_LC	392
2020_LC_Adj	17
2020_OVC	1055
2020_OVC_Adj	45
2020_PDAC	636
2020_PDAC_Adj	5
2021_ICC	44
2021_OVC	1601
2021_OVC_Adj	28
2021_PRAD	43
