# Supplementary material for: Single-cell analysis reveals the COL11A1+ fibroblasts are cancer-specific fibroblasts that promote tumor progression
Source: Front Pharmacol. 2023 Jan 20;14:1121586. doi: 10.3389/fphar.2023.1121586 (PMC9894880; doi:10.3389/fphar.2023.1121586)
Supplement: Supplementary file 5 [file Table4.XLSX]

## Sheet: Table S4
Supplementary Table S4. Top 50 differentially expressed genes of each cell population across normal tissues
gene	p_val	avg_log2FC	pct.1	pct.2	p_val_adj	cluster
S100A9	0	5.01985	0.93	0.245	0	Monocytes
S100A8	0	4.85895	0.864	0.201	0	Monocytes
FCN1	0	3.37904	0.811	0.063	0	Monocytes
S100A12	0	3.29547	0.486	0.014	0	Monocytes
G0S2	0	2.94547	0.359	0.109	0	Monocytes
LYZ	0	2.94421	0.932	0.345	0	Monocytes
VCAN	0	2.74255	0.634	0.108	0	Monocytes
RP11-1143G9.4	0	2.61002	0.492	0.113	0	Monocytes
NAMPT	0	2.56682	0.758	0.317	0	Monocytes
LST1	0	2.53505	0.89	0.258	0	Monocytes
MNDA	0	2.45662	0.701	0.149	0	Monocytes
CTSS	0	2.37182	0.939	0.416	0	Monocytes
AIF1	0	2.32897	0.904	0.282	0	Monocytes
IL1B	0	2.30977	0.455	0.081	0	Monocytes
CSTA	0	2.07569	0.709	0.162	0	Monocytes
SOD2	0	2.05613	0.743	0.359	0	Monocytes
FPR1	0	2.03301	0.598	0.116	0	Monocytes
COTL1	0	1.99965	0.833	0.348	0	Monocytes
SAT1	0	1.98363	0.966	0.756	0	Monocytes
EREG	0	1.97385	0.338	0.036	0	Monocytes
CSF3R	0	1.95588	0.404	0.067	0	Monocytes
PLAUR	0	1.92033	0.656	0.232	0	Monocytes
BCL2A1	0	1.91053	0.589	0.186	0	Monocytes
THBS1	0	1.90732	0.374	0.146	0	Monocytes
TYROBP	0	1.89532	0.977	0.389	0	Monocytes
C5AR1	0	1.87367	0.578	0.129	0	Monocytes
FCER1G	0	1.82065	0.938	0.345	0	Monocytes
PTGS2	0	1.81545	0.215	0.049	0	Monocytes
CEBPB	0	1.79248	0.643	0.344	0	Monocytes
AP1S2	0	1.74765	0.681	0.265	0	Monocytes
TYMP	0	1.74174	0.825	0.382	0	Monocytes
RGS2	0	1.72088	0.697	0.354	0	Monocytes
CFP	0	1.7001	0.536	0.074	0	Monocytes
IL1R2	0	1.69371	0.204	0.033	0	Monocytes
CXCL8	0	1.68988	0.236	0.071	0	Monocytes
SLC11A1	0	1.68346	0.574	0.139	0	Monocytes
NEAT1	0	1.65276	0.977	0.831	0	Monocytes
FGL2	0	1.64915	0.632	0.167	0	Monocytes
GCA	0	1.57408	0.507	0.188	0	Monocytes
SRGN	0	1.56211	0.97	0.711	0	Monocytes
TIMP1	0	1.54987	0.766	0.531	0	Monocytes
CLEC4E	0	1.54222	0.412	0.071	0	Monocytes
APOBEC3A	0	1.51058	0.295	0.018	0	Monocytes
STXBP2	0	1.49484	0.593	0.244	0	Monocytes
MXD1	0	1.48921	0.357	0.088	0	Monocytes
CYBB	0	1.48762	0.602	0.168	0	Monocytes
TKT	0	1.4875	0.692	0.389	0	Monocytes
CD14	0	1.47618	0.609	0.196	0	Monocytes
CLEC7A	0	1.46478	0.548	0.144	0	Monocytes
IL8	3.52e-255	2.04644	0.158	0.043	9.32e-251	Monocytes
C1QB	0	4.33426	0.928	0.196	0	Macrophages
CCL18	0	4.30446	0.641	0.1	0	Macrophages
C1QA	0	4.22966	0.945	0.209	0	Macrophages
C1QC	0	3.73116	0.881	0.087	0	Macrophages
FTL	0	3.7167	1	0.982	0	Macrophages
APOC1	0	3.6256	0.857	0.253	0	Macrophages
APOE	0	3.45212	0.838	0.247	0	Macrophages
MARCO	0	3.29835	0.766	0.079	0	Macrophages
CTSD	0	2.84489	0.95	0.493	0	Macrophages
CD68	0	2.8402	0.947	0.154	0	Macrophages
MS4A7	0	2.8027	0.931	0.103	0	Macrophages
CTSB	0	2.76481	0.969	0.357	0	Macrophages
TYROBP	0	2.59798	0.993	0.317	0	Macrophages
FCER1G	0	2.50356	0.986	0.267	0	Macrophages
HLA-DRA	0	2.46682	0.988	0.542	0	Macrophages
VSIG4	0	2.43962	0.822	0.056	0	Macrophages
FTH1	0	2.43587	1	0.989	0	Macrophages
GRN	0	2.41394	0.955	0.368	0	Macrophages
ACP5	0	2.37842	0.756	0.159	0	Macrophages
CSTB	0	2.37478	0.935	0.561	0	Macrophages
GCHFR	0	2.34571	0.634	0.162	0	Macrophages
CTSZ	0	2.29528	0.883	0.231	0	Macrophages
MCEMP1	0	2.23141	0.485	0.031	0	Macrophages
S100A11	0	2.20937	0.983	0.681	0	Macrophages
MSR1	0	2.19439	0.743	0.041	0	Macrophages
HLA-DPA1	0	2.14546	0.97	0.487	0	Macrophages
LGALS3	0	2.13537	0.877	0.457	0	Macrophages
FN1	0	2.13423	0.579	0.171	0	Macrophages
GPX1	0	2.12902	0.983	0.541	0	Macrophages
FBP1	0	2.1255	0.696	0.134	0	Macrophages
PSAP	0	2.09352	0.987	0.624	0	Macrophages
HLA-DQA1	0	2.08532	0.889	0.232	0	Macrophages
AIF1	0	2.08156	0.956	0.2	0	Macrophages
MS4A6A	0	2.0786	0.805	0.121	0	Macrophages
FABP4	0	2.0698	0.51	0.148	0	Macrophages
LYZ	0	2.06381	0.957	0.272	0	Macrophages
MRC1	0	2.04215	0.688	0.043	0	Macrophages
MS4A4A	0	2.01901	0.758	0.052	0	Macrophages
CD74	0	1.98304	0.986	0.721	0	Macrophages
HLA-DRB1	0	1.97542	0.976	0.508	0	Macrophages
GLUL	0	1.96522	0.944	0.472	0	Macrophages
HLA-DRB5	0	1.94558	0.687	0.156	0	Macrophages
CD163	0	1.93493	0.688	0.056	0	Macrophages
CAPG	0	1.92285	0.738	0.215	0	Macrophages
HLA-DPB1	0	1.90871	0.971	0.516	0	Macrophages
LIPA	0	1.90792	0.736	0.155	0	Macrophages
C1orf162	0	1.88686	0.899	0.178	0	Macrophages
HLA-DMA	0	1.84707	0.918	0.265	0	Macrophages
GPNMB	0	1.83806	0.767	0.131	0	Macrophages
SPI1	0	1.81923	0.83	0.11	0	Macrophages
IGLC2	0	7.15344	0.703	0.12	0	B_Plasma_cells
IGLC3	0	7.15221	0.567	0.075	0	B_Plasma_cells
IGHA1	0	6.71926	0.794	0.179	0	B_Plasma_cells
IGKC	0	6.48518	0.799	0.241	0	B_Plasma_cells
JCHAIN	0	6.44456	0.792	0.12	0	B_Plasma_cells
IGHA2	0	5.91794	0.75	0.043	0	B_Plasma_cells
IGLL5	0	5.77126	0.423	0.083	0	B_Plasma_cells
IGHM	0	4.51571	0.309	0.039	0	B_Plasma_cells
MZB1	0	4.35409	0.968	0.05	0	B_Plasma_cells
IGHG1	0	4.32985	0.169	0.023	0	B_Plasma_cells
IGHG4	0	3.73664	0.147	0.023	0	B_Plasma_cells
AL928768.3	0	3.04439	0.757	0.011	0	B_Plasma_cells
SSR4	0	2.92305	0.986	0.705	0	B_Plasma_cells
DERL3	0	2.87082	0.911	0.031	0	B_Plasma_cells
CD79A	0	2.34844	0.866	0.027	0	B_Plasma_cells
TNFRSF17	0	2.2739	0.862	0.01	0	B_Plasma_cells
XBP1	0	2.21532	0.947	0.449	0	B_Plasma_cells
IGKV1-12	0	2.18651	0.255	0.003	0	B_Plasma_cells
SEC11C	0	2.15357	0.919	0.286	0	B_Plasma_cells
FKBP11	0	2.10036	0.897	0.234	0	B_Plasma_cells
HERPUD1	0	2.03806	0.969	0.547	0	B_Plasma_cells
HSP90B1	0	1.93332	0.962	0.55	0	B_Plasma_cells
ITM2C	0	1.64718	0.757	0.207	0	B_Plasma_cells
UBE2J1	0	1.59348	0.878	0.219	0	B_Plasma_cells
IGLC7	0	1.59185	0.131	0.002	0	B_Plasma_cells
CD27	0	1.53105	0.762	0.103	0	B_Plasma_cells
PRDX4	0	1.52428	0.821	0.262	0	B_Plasma_cells
SPCS2	0	1.4782	0.959	0.541	0	B_Plasma_cells
PIM2	0	1.42193	0.701	0.118	0	B_Plasma_cells
FKBP2	0	1.41245	0.921	0.447	0	B_Plasma_cells
SDF2L1	0	1.35574	0.849	0.262	0	B_Plasma_cells
IGKV4-1	0	1.29063	0.166	0.005	0	B_Plasma_cells
SPCS1	0	1.26086	0.943	0.565	0	B_Plasma_cells
PDIA4	0	1.24883	0.808	0.254	0	B_Plasma_cells
MANF	0	1.2008	0.82	0.293	0	B_Plasma_cells
SSR3	0	1.19298	0.901	0.422	0	B_Plasma_cells
DNAJB9	0	1.17037	0.819	0.252	0	B_Plasma_cells
VIMP	0	1.16473	0.893	0.398	0	B_Plasma_cells
SPCS3	0	1.14546	0.81	0.311	0	B_Plasma_cells
POU2AF1	0	1.13518	0.621	0.009	0	B_Plasma_cells
CD38	0	1.13157	0.456	0.097	0	B_Plasma_cells
IGLV6-57	0	1.07531	0.281	0.002	0	B_Plasma_cells
IGLV2-14	0	1.03996	0.111	0.003	0	B_Plasma_cells
PDIA6	0	1.02698	0.888	0.442	0	B_Plasma_cells
EAF2	0	1.02584	0.534	0.047	0	B_Plasma_cells
KIAA0125	0	1.02133	0.307	0.007	0	B_Plasma_cells
GNG7	0	0.989941	0.622	0.047	0	B_Plasma_cells
IGHG3	3.95e-203	4.50033	0.163	0.04	1.04e-198	B_Plasma_cells
IGJ	1.93e-111	5.54143	0.173	0.069	5.1e-107	B_Plasma_cells
C19orf10	1.94e-13	1.22361	0.175	0.145	5.14e-09	B_Plasma_cells
CD79A	0	3.12744	0.729	0.051	0	B_cells
MS4A1	0	2.68037	0.572	0.008	0	B_cells
GPR183	0	2.42434	0.697	0.24	0	B_cells
BANK1	0	1.98538	0.491	0.017	0	B_cells
IRF8	0	1.9059	0.526	0.141	0	B_cells
PLD4	0	1.79251	0.282	0.027	0	B_cells
CD79B	0	1.7834	0.468	0.055	0	B_cells
LTB	0	1.76706	0.752	0.234	0	B_cells
VPREB3	0	1.76579	0.337	0.006	0	B_cells
LILRA4	0	1.63442	0.215	0.004	0	B_cells
TCL1A	0	1.57735	0.154	0.001	0	B_cells
SPIB	0	1.45374	0.356	0.014	0	B_cells
RP5-887A10.1	0	1.34746	0.227	0.007	0	B_cells
SELL	0	1.29912	0.434	0.093	0	B_cells
BCL11A	0	1.21734	0.293	0.018	0	B_cells
BLK	0	1.16326	0.28	0.009	0	B_cells
CCR7	0	1.15233	0.273	0.031	0	B_cells
LINC00926	0	1.14568	0.247	0.007	0	B_cells
ADAM28	0	1.05571	0.284	0.043	0	B_cells
TNFRSF13B	0	1.03503	0.282	0.025	0	B_cells
IGHD	0	1.02564	0.11	0.002	0	B_cells
FCRLA	0	0.954141	0.218	0.004	0	B_cells
CD37	2.02e-301	1.72039	0.857	0.443	5.33e-297	B_cells
CD74	3.52e-285	1.43151	0.98	0.76	9.3e-281	B_cells
LY9	1.02e-278	1.11812	0.327	0.06	2.7e-274	B_cells
IGJ	1.81e-250	1.88815	0.33	0.07	4.79e-246	B_cells
MEF2C	1.21e-240	1.19174	0.572	0.195	3.21e-236	B_cells
MZB1	1.14e-234	1.41666	0.371	0.084	3e-230	B_cells
HLA-DQB1	9.8e-226	1.05589	0.847	0.401	2.59e-221	B_cells
POU2F2	8.72e-221	1.06012	0.351	0.084	2.31e-216	B_cells
IGHM	6.28e-170	2.30529	0.229	0.048	1.66e-165	B_cells
TCF4	7.23e-168	1.1378	0.513	0.199	1.91e-163	B_cells
CD83	2.04e-167	1.41981	0.512	0.205	5.39e-163	B_cells
ORAI2	3.2e-153	0.985042	0.372	0.12	8.46e-149	B_cells
PLAC8	1.53e-149	1.6165	0.482	0.194	4.04e-145	B_cells
HERPUD1	7.76e-146	1.27255	0.787	0.562	2.05e-141	B_cells
AL928768.3	1.32e-129	1.19238	0.191	0.04	3.48e-125	B_cells
TSPAN13	3.04e-128	1.00611	0.275	0.079	8.03e-124	B_cells
CYB561A3	4.01e-124	0.989313	0.297	0.095	1.06e-119	B_cells
CCDC50	2.46e-113	1.19303	0.427	0.196	6.51e-109	B_cells
EZR	1.63e-100	1.08826	0.64	0.399	4.32e-96	B_cells
RNASE6	1.65e-86	0.973566	0.381	0.167	4.36e-82	B_cells
IRF7	7.1e-75	1.79684	0.319	0.146	1.88e-70	B_cells
HLA-DQA2	5.13e-66	1.03587	0.282	0.121	1.36e-61	B_cells
SMIM14	3.81e-63	1.04928	0.425	0.256	1.01e-58	B_cells
IGHG1	2.79e-57	1.4115	0.109	0.028	7.38e-53	B_cells
IGLL5	1.47e-56	1.48689	0.234	0.095	3.89e-52	B_cells
ITM2C	8.51e-55	1.21954	0.39	0.228	2.25e-50	B_cells
GZMB	5.12e-19	1.68245	0.244	0.16	1.35e-14	B_cells
PTGDS	0.00167467	1.57072	0.113	0.09	1	B_cells
DCN	0	5.72522	0.971	0.121	0	Fibroblasts
LUM	0	4.95566	0.748	0.057	0	Fibroblasts
CFD	0	4.65302	0.525	0.3	0	Fibroblasts
MGP	0	4.40621	0.761	0.195	0	Fibroblasts
COL1A2	0	4.20664	0.772	0.059	0	Fibroblasts
APOD	0	4.11463	0.478	0.049	0	Fibroblasts
COL1A1	0	4.03485	0.718	0.055	0	Fibroblasts
COL3A1	0	3.82677	0.558	0.048	0	Fibroblasts
IGFBP6	0	3.69141	0.699	0.095	0	Fibroblasts
SFRP2	0	3.59955	0.323	0.018	0	Fibroblasts
GSN	0	3.51146	0.798	0.32	0	Fibroblasts
DPT	0	3.50705	0.441	0.02	0	Fibroblasts
FBLN1	0	3.35383	0.613	0.028	0	Fibroblasts
CCDC80	0	3.23756	0.653	0.05	0	Fibroblasts
CXCL14	0	3.23526	0.21	0.013	0	Fibroblasts
C1R	0	3.19037	0.806	0.083	0	Fibroblasts
C1S	0	3.17202	0.869	0.076	0	Fibroblasts
IGFBP5	0	3.06676	0.779	0.074	0	Fibroblasts
COL6A2	0	3.03063	0.791	0.081	0	Fibroblasts
MFAP4	0	3.0089	0.706	0.047	0	Fibroblasts
SERPINF1	0	2.9923	0.8	0.109	0	Fibroblasts
C7	0	2.92376	0.515	0.028	0	Fibroblasts
RBP1	0	2.90747	0.603	0.094	0	Fibroblasts
RARRES2	0	2.73583	0.904	0.146	0	Fibroblasts
MFAP5	0	2.68577	0.25	0.017	0	Fibroblasts
CYR61	0	2.60035	0.534	0.1	0	Fibroblasts
MEG3	0	2.57129	0.683	0.04	0	Fibroblasts
MMP2	0	2.45606	0.632	0.026	0	Fibroblasts
PTGDS	0	2.44245	0.263	0.062	0	Fibroblasts
COL6A1	0	2.42474	0.713	0.065	0	Fibroblasts
MDK	0	2.41738	0.628	0.094	0	Fibroblasts
ADH1B	0	2.40976	0.512	0.067	0	Fibroblasts
EFEMP1	0	2.35656	0.59	0.058	0	Fibroblasts
PLAC9	0	2.34064	0.428	0.062	0	Fibroblasts
PCOLCE	0	2.32516	0.555	0.033	0	Fibroblasts
SPARC	0	2.30282	0.752	0.163	0	Fibroblasts
COL6A3	0	2.28137	0.562	0.021	0	Fibroblasts
FSTL1	0	2.25609	0.513	0.048	0	Fibroblasts
CTGF	0	2.21363	0.431	0.074	0	Fibroblasts
GPX3	0	2.18281	0.556	0.2	0	Fibroblasts
C3	0	2.15361	0.441	0.09	0	Fibroblasts
CALD1	0	2.12178	0.928	0.136	0	Fibroblasts
SERPINE2	0	2.06899	0.449	0.021	0	Fibroblasts
CXCL12	0	2.06439	0.52	0.068	0	Fibroblasts
LTBP4	0	2.04485	0.659	0.09	0	Fibroblasts
FBN1	0	2.02027	0.422	0.018	0	Fibroblasts
TNXB	0	1.96739	0.469	0.023	0	Fibroblasts
FHL2	0	1.96177	0.464	0.032	0	Fibroblasts
SFRP4	0	1.95963	0.288	0.007	0	Fibroblasts
WISP2	0	1.91889	0.448	0.017	0	Fibroblasts
CCL5	0	2.3198	0.958	0.319	0	CD8+T_cells
CCL4	0	2.10493	0.84	0.356	0	CD8+T_cells
GZMK	0	1.93199	0.554	0.147	0	CD8+T_cells
GZMH	0	1.8655	0.658	0.152	0	CD8+T_cells
GZMA	0	1.80393	0.802	0.242	0	CD8+T_cells
CD3D	0	1.77276	0.9	0.273	0	CD8+T_cells
CD8A	0	1.73303	0.569	0.114	0	CD8+T_cells
CXCR4	0	1.68254	0.961	0.529	0	CD8+T_cells
IL32	0	1.6417	0.933	0.462	0	CD8+T_cells
CD2	0	1.59821	0.8	0.24	0	CD8+T_cells
NKG7	0	1.59549	0.804	0.265	0	CD8+T_cells
CD8B	0	1.58582	0.49	0.089	0	CD8+T_cells
CD3E	0	1.56488	0.804	0.221	0	CD8+T_cells
CD69	0	1.55484	0.855	0.347	0	CD8+T_cells
PTPRCAP	0	1.54266	0.559	0.166	0	CD8+T_cells
DUSP2	0	1.51842	0.506	0.192	0	CD8+T_cells
CST7	0	1.51576	0.762	0.25	0	CD8+T_cells
AC092580.4	0	1.4173	0.549	0.134	0	CD8+T_cells
IFNG	0	1.41558	0.314	0.087	0	CD8+T_cells
KLRD1	0	1.40814	0.521	0.126	0	CD8+T_cells
CD7	0	1.39402	0.624	0.195	0	CD8+T_cells
CD3G	0	1.3898	0.606	0.151	0	CD8+T_cells
TUBA4A	0	1.37943	0.599	0.241	0	CD8+T_cells
LCK	0	1.3664	0.66	0.184	0	CD8+T_cells
HCST	0	1.36638	0.878	0.456	0	CD8+T_cells
CTSW	0	1.35998	0.617	0.183	0	CD8+T_cells
PTPRC	0	1.34333	0.887	0.473	0	CD8+T_cells
GZMM	0	1.32374	0.586	0.158	0	CD8+T_cells
GZMB	0	1.31277	0.414	0.134	0	CD8+T_cells
CORO1A	0	1.30336	0.85	0.41	0	CD8+T_cells
XCL2	0	1.29938	0.306	0.053	0	CD8+T_cells
TRAC	0	1.28956	0.321	0.121	0	CD8+T_cells
RGS1	0	1.26109	0.737	0.384	0	CD8+T_cells
TRBC2	0	1.24592	0.268	0.103	0	CD8+T_cells
TMEM66	0	1.22059	0.55	0.259	0	CD8+T_cells
IL7R	0	1.21048	0.488	0.232	0	CD8+T_cells
BTG1	0	1.19672	0.953	0.82	0	CD8+T_cells
KLRB1	0	1.19584	0.573	0.227	0	CD8+T_cells
EVL	0	1.19346	0.731	0.378	0	CD8+T_cells
SYTL3	0	1.18466	0.464	0.142	0	CD8+T_cells
ACAP1	0	1.15509	0.582	0.209	0	CD8+T_cells
IL2RG	0	1.13797	0.672	0.325	0	CD8+T_cells
STK17A	0	1.13654	0.564	0.239	0	CD8+T_cells
XCL1	0	1.13115	0.216	0.036	0	CD8+T_cells
PIK3R1	0	1.12726	0.497	0.264	0	CD8+T_cells
RUNX3	0	1.11429	0.438	0.137	0	CD8+T_cells
CREM	0	1.10999	0.531	0.364	0	CD8+T_cells
ARHGDIB	0	1.10921	0.922	0.599	0	CD8+T_cells
CD96	0	1.09945	0.473	0.129	0	CD8+T_cells
CMC1	5.73e-206	1.20779	0.375	0.247	1.51e-201	CD8+T_cells
FCN3	0	5.01863	0.52	0.056	0	Endothelial_cells
CLDN5	0	4.57364	0.836	0.034	0	Endothelial_cells
CCL21	0	3.87326	0.165	0.034	0	Endothelial_cells
RAMP2	0	3.71845	0.864	0.069	0	Endothelial_cells
IFI27	0	3.65674	0.925	0.256	0	Endothelial_cells
DNASE1L3	0	3.5003	0.294	0.038	0	Endothelial_cells
TM4SF1	0	3.44146	0.841	0.143	0	Endothelial_cells
SDPR	0	3.4195	0.802	0.074	0	Endothelial_cells
EPAS1	0	3.37375	0.785	0.131	0	Endothelial_cells
VWF	0	3.34901	0.61	0.021	0	Endothelial_cells
GNG11	0	3.13041	0.85	0.176	0	Endothelial_cells
EGFL7	0	3.03848	0.779	0.039	0	Endothelial_cells
C10orf10	0	2.98316	0.49	0.116	0	Endothelial_cells
AQP1	0	2.92993	0.536	0.055	0	Endothelial_cells
CLEC14A	0	2.92929	0.638	0.01	0	Endothelial_cells
CRHBP	0	2.92226	0.206	0.018	0	Endothelial_cells
HES1	0	2.91545	0.532	0.109	0	Endothelial_cells
HYAL2	0	2.91355	0.71	0.076	0	Endothelial_cells
RAMP3	0	2.87828	0.629	0.014	0	Endothelial_cells
CA4	0	2.82857	0.341	0.026	0	Endothelial_cells
SLC9A3R2	0	2.80429	0.596	0.048	0	Endothelial_cells
TMEM100	0	2.79448	0.354	0.046	0	Endothelial_cells
EDN1	0	2.78978	0.348	0.021	0	Endothelial_cells
TIMP3	0	2.6879	0.811	0.167	0	Endothelial_cells
PLVAP	0	2.66685	0.302	0.007	0	Endothelial_cells
SPARCL1	0	2.63351	0.662	0.178	0	Endothelial_cells
EMP1	0	2.63301	0.531	0.146	0	Endothelial_cells
ID1	0	2.57928	0.644	0.15	0	Endothelial_cells
CAV1	0	2.53911	0.819	0.187	0	Endothelial_cells
IFITM3	0	2.52774	0.975	0.496	0	Endothelial_cells
ENG	0	2.43068	0.68	0.159	0	Endothelial_cells
TNFSF10	0	2.42806	0.611	0.208	0	Endothelial_cells
CLEC4G	0	2.41406	0.157	0.013	0	Endothelial_cells
IL6	0	2.40397	0.172	0.039	0	Endothelial_cells
PECAM1	0	2.38813	0.543	0.114	0	Endothelial_cells
SOCS3	0	2.3834	0.629	0.308	0	Endothelial_cells
C8orf4	0	2.37222	0.506	0.1	0	Endothelial_cells
CLEC1B	0	2.36578	0.143	0.01	0	Endothelial_cells
ESAM	0	2.33709	0.614	0.038	0	Endothelial_cells
CD36	0	2.33217	0.45	0.099	0	Endothelial_cells
CD59	0	2.31381	0.842	0.4	0	Endothelial_cells
A2M	0	2.30041	0.731	0.166	0	Endothelial_cells
PTPRB	0	2.2793	0.545	0.008	0	Endothelial_cells
TFPI	0	2.26206	0.541	0.106	0	Endothelial_cells
ACKR1	0	2.25092	0.149	0.009	0	Endothelial_cells
AKAP12	0	2.22766	0.384	0.106	0	Endothelial_cells
STC1	0	2.20828	0.191	0.006	0	Endothelial_cells
FCN2	0	2.20241	0.162	0.009	0	Endothelial_cells
CCL2	1.31e-227	2.37676	0.293	0.124	3.47e-223	Endothelial_cells
FABP4	1.38e-63	2.51007	0.303	0.201	3.64e-59	Endothelial_cells
TAGLN	0	5.62002	0.963	0.16	0	Pericytes
MYL9	0	4.7403	0.975	0.177	0	Pericytes
ACTA2	0	4.68341	0.937	0.108	0	Pericytes
ADIRF	0	4.45873	0.963	0.252	0	Pericytes
TPM2	0	4.19441	0.963	0.143	0	Pericytes
MYH11	0	3.98897	0.881	0.023	0	Pericytes
C11orf96	0	3.56056	0.579	0.057	0	Pericytes
DSTN	0	3.47593	0.973	0.529	0	Pericytes
IGFBP7	0	3.42356	0.983	0.281	0	Pericytes
PLN	0	3.42104	0.82	0.007	0	Pericytes
TSC22D1	0	3.25646	0.927	0.26	0	Pericytes
RERGL	0	3.19501	0.718	0.006	0	Pericytes
PPP1R14A	0	3.02698	0.873	0.095	0	Pericytes
CALD1	0	3.02655	0.981	0.212	0	Pericytes
RGS5	0	2.94852	0.356	0.023	0	Pericytes
TPM1	0	2.85353	0.915	0.237	0	Pericytes
SNCG	0	2.77072	0.735	0.057	0	Pericytes
SPARCL1	0	2.73673	0.953	0.172	0	Pericytes
SOD3	0	2.713	0.859	0.115	0	Pericytes
CSRP2	0	2.69895	0.77	0.036	0	Pericytes
BCAM	0	2.62993	0.819	0.092	0	Pericytes
BGN	0	2.58555	0.756	0.065	0	Pericytes
IGFBP5	0	2.57494	0.867	0.14	0	Pericytes
CSRP1	0	2.53684	0.86	0.216	0	Pericytes
MFGE8	0	2.51356	0.871	0.137	0	Pericytes
ACTG2	0	2.49887	0.393	0.007	0	Pericytes
MT1M	0	2.44815	0.731	0.141	0	Pericytes
SELM	0	2.44446	0.93	0.328	0	Pericytes
TINAGL1	0	2.43531	0.801	0.06	0	Pericytes
C2orf40	0	2.39203	0.688	0.019	0	Pericytes
CRYAB	0	2.34682	0.791	0.089	0	Pericytes
NDUFA4L2	0	2.26629	0.362	0.014	0	Pericytes
MCAM	0	2.2435	0.687	0.03	0	Pericytes
MYLK	0	2.23983	0.709	0.047	0	Pericytes
LMOD1	0	2.21038	0.707	0.026	0	Pericytes
SORBS2	0	2.17552	0.612	0.064	0	Pericytes
CNN1	0	2.14407	0.615	0.012	0	Pericytes
PRKCDBP	0	2.11431	0.78	0.138	0	Pericytes
PDK4	0	2.07997	0.805	0.279	0	Pericytes
HSPB1	0	2.0776	0.946	0.511	0	Pericytes
DES	0	2.07203	0.396	0.022	0	Pericytes
FRZB	0	2.06192	0.653	0.025	0	Pericytes
NOTCH3	0	2.03522	0.629	0.012	0	Pericytes
CKB	0	1.9696	0.722	0.13	0	Pericytes
PTRF	0	1.92528	0.829	0.171	0	Pericytes
PALLD	0	1.89376	0.693	0.102	0	Pericytes
CAV1	0	1.89061	0.92	0.192	0	Pericytes
FLNA	0	1.8876	0.834	0.354	0	Pericytes
COX7A1	0	1.86007	0.721	0.109	0	Pericytes
MT1E	0	1.83617	0.861	0.309	0	Pericytes
PRSS1	0	7.02297	0.251	0.073	0	Epithelial_cells
CLPS	0	6.38615	0.244	0.067	0	Epithelial_cells
PNLIP	0	6.17526	0.238	0.06	0	Epithelial_cells
CTRB1	0	6.00459	0.226	0.048	0	Epithelial_cells
CPA1	0	5.94582	0.24	0.05	0	Epithelial_cells
CPB1	0	5.73148	0.26	0.052	0	Epithelial_cells
CELA2A	0	5.60648	0.219	0.039	0	Epithelial_cells
AMY2A	0	5.55969	0.222	0.04	0	Epithelial_cells
CELA3B	0	5.49709	0.226	0.042	0	Epithelial_cells
CELA3A	0	5.15899	0.218	0.035	0	Epithelial_cells
PLA2G1B	0	5.07647	0.296	0.049	0	Epithelial_cells
CTRC	0	5.05151	0.228	0.043	0	Epithelial_cells
CEL	0	5.02045	0.221	0.033	0	Epithelial_cells
GP2	0	4.87299	0.235	0.034	0	Epithelial_cells
SPINK1	0	4.79611	0.347	0.033	0	Epithelial_cells
REG1A	0	4.62145	0.226	0.034	0	Epithelial_cells
ALB	0	4.60565	0.342	0.099	0	Epithelial_cells
SYCN	0	4.47024	0.218	0.029	0	Epithelial_cells
CTRB2	0	4.36903	0.225	0.039	0	Epithelial_cells
FABP1	0	4.10933	0.26	0.079	0	Epithelial_cells
PRSS3	0	4.03006	0.31	0.031	0	Epithelial_cells
SFTPB	0	3.97206	0.224	0.082	0	Epithelial_cells
CPA2	0	3.9684	0.215	0.026	0	Epithelial_cells
MT1G	0	3.94437	0.542	0.095	0	Epithelial_cells
ZG16	0	3.77866	0.143	0.026	0	Epithelial_cells
KRT18	0	3.52933	0.853	0.083	0	Epithelial_cells
AMY2B	0	3.52376	0.216	0.025	0	Epithelial_cells
KRT8	0	3.4956	0.829	0.073	0	Epithelial_cells
SLPI	0	3.38203	0.511	0.116	0	Epithelial_cells
KRT19	0	3.16496	0.591	0.07	0	Epithelial_cells
CELA2B	0	3.03226	0.196	0.014	0	Epithelial_cells
NAPSA	0	2.83754	0.213	0.038	0	Epithelial_cells
HP	0	2.83134	0.252	0.054	0	Epithelial_cells
FXYD2	0	2.81143	0.158	0.021	0	Epithelial_cells
AGER	0	2.7803	0.163	0.034	0	Epithelial_cells
LGALS4	0	2.73641	0.264	0.032	0	Epithelial_cells
PNLIPRP1	0	2.68837	0.201	0.01	0	Epithelial_cells
FXYD3	0	2.65278	0.471	0.051	0	Epithelial_cells
TTR	0	2.53099	0.169	0.03	0	Epithelial_cells
KRT7	0	2.52267	0.426	0.027	0	Epithelial_cells
TFF3	2.26e-267	3.00861	0.179	0.065	5.98e-263	Epithelial_cells
APOC3	5.71e-241	3.61324	0.161	0.06	1.51e-236	Epithelial_cells
APOA2	1.96e-184	3.64875	0.159	0.068	5.18e-180	Epithelial_cells
SFTPA1	2.78e-184	3.98788	0.181	0.085	7.35e-180	Epithelial_cells
SCGB3A1	5.39e-161	2.70272	0.186	0.089	1.43e-156	Epithelial_cells
SFTPA2	1.22e-147	4.07751	0.184	0.097	3.22e-143	Epithelial_cells
SCGB3A2	2.13e-141	4.01731	0.165	0.082	5.64e-137	Epithelial_cells
APOA1	8.79e-135	2.70633	0.161	0.078	2.32e-130	Epithelial_cells
PHGR1	7.12e-108	3.71253	0.136	0.07	1.88e-103	Epithelial_cells
SFTPC	1.23e-06	5.68947	0.23	0.243	0.0326226	Epithelial_cells
HLA-DPB1	0	3.27572	0.996	0.577	0	Dendritic_cells
HLA-DQA1	0	3.06287	0.989	0.318	0	Dendritic_cells
HLA-DQB1	0	2.98041	0.989	0.39	0	Dendritic_cells
HLA-DPA1	0	2.93683	0.998	0.552	0	Dendritic_cells
HLA-DRA	0	2.82824	0.999	0.603	0	Dendritic_cells
HLA-DRB1	0	2.74773	0.994	0.571	0	Dendritic_cells
FCER1A	0	2.74445	0.486	0.015	0	Dendritic_cells
CD74	0	2.68371	0.998	0.756	0	Dendritic_cells
CCL17	0	2.67782	0.147	0.01	0	Dendritic_cells
CST3	0	2.48566	0.987	0.665	0	Dendritic_cells
CPVL	0	2.43901	0.822	0.179	0	Dendritic_cells
CLEC10A	0	2.32489	0.651	0.062	0	Dendritic_cells
CD1C	0	2.2663	0.562	0.015	0	Dendritic_cells
HLA-DRB5	0	2.10852	0.547	0.233	0	Dendritic_cells
LGALS2	0	2.10721	0.698	0.101	0	Dendritic_cells
GPR183	0	1.97614	0.859	0.228	0	Dendritic_cells
HLA-DMA	0	1.86414	0.961	0.353	0	Dendritic_cells
LYZ	0	1.85753	0.975	0.365	0	Dendritic_cells
CD1E	0	1.83419	0.443	0.009	0	Dendritic_cells
AREG	0	1.77176	0.505	0.181	0	Dendritic_cells
HLA-DMB	0	1.75595	0.904	0.229	0	Dendritic_cells
HLA-DQA2	0	1.74957	0.495	0.111	0	Dendritic_cells
RNASE6	0	1.74198	0.748	0.152	0	Dendritic_cells
S100B	0	1.68228	0.224	0.02	0	Dendritic_cells
MS4A6A	0	1.58445	0.712	0.217	0	Dendritic_cells
C15orf48	0	1.56391	0.557	0.149	0	Dendritic_cells
C1orf162	0	1.55333	0.897	0.276	0	Dendritic_cells
SGK1	0	1.48246	0.748	0.282	0	Dendritic_cells
FGL2	0	1.42892	0.811	0.178	0	Dendritic_cells
HLA-DQB2	0	1.42504	0.328	0.043	0	Dendritic_cells
CSF2RA	0	1.40845	0.65	0.072	0	Dendritic_cells
IFI30	0	1.40303	0.67	0.151	0	Dendritic_cells
LST1	0	1.3897	0.886	0.281	0	Dendritic_cells
IDO1	0	1.38347	0.308	0.016	0	Dendritic_cells
PLAUR	0	1.3314	0.727	0.245	0	Dendritic_cells
IRF8	0	1.32224	0.455	0.138	0	Dendritic_cells
CD83	0	1.31966	0.702	0.194	0	Dendritic_cells
LSP1	0	1.30966	0.902	0.468	0	Dendritic_cells
FCGR2B	0	1.30753	0.474	0.073	0	Dendritic_cells
GPX1	0	1.30528	0.979	0.602	0	Dendritic_cells
RGS2	0	1.29702	0.811	0.363	0	Dendritic_cells
C1orf54	0	1.2873	0.421	0.107	0	Dendritic_cells
PKIB	0	1.28075	0.477	0.039	0	Dendritic_cells
RGS10	0	1.27332	0.855	0.342	0	Dendritic_cells
CD86	0	1.26215	0.667	0.122	0	Dendritic_cells
PTPRE	0	1.24043	0.684	0.181	0	Dendritic_cells
AIF1	0	1.22751	0.94	0.303	0	Dendritic_cells
TYMP	0	1.22556	0.878	0.396	0	Dendritic_cells
FAM26F	0	1.22403	0.609	0.114	0	Dendritic_cells
SNX3	9.3e-240	1.4479	0.911	0.615	2.46e-235	Dendritic_cells
LTB	0	2.47141	0.66	0.165	0	CD4+T_cells
KLRB1	0	2.45623	0.6	0.197	0	CD4+T_cells
CD69	0	2.24628	0.849	0.312	0	CD4+T_cells
IL7R	0	2.23195	0.688	0.177	0	CD4+T_cells
CD2	0	1.90878	0.775	0.205	0	CD4+T_cells
IL32	0	1.82214	0.908	0.433	0	CD4+T_cells
CXCR4	0	1.79874	0.93	0.505	0	CD4+T_cells
CD3D	0	1.78998	0.848	0.238	0	CD4+T_cells
TRAC	0	1.72511	0.361	0.099	0	CD4+T_cells
CD3E	0	1.69393	0.744	0.191	0	CD4+T_cells
GZMK	0	1.57909	0.423	0.143	0	CD4+T_cells
RORA	0	1.45283	0.509	0.2	0	CD4+T_cells
SPOCK2	0	1.40981	0.496	0.126	0	CD4+T_cells
LEPROTL1	0	1.39315	0.681	0.399	0	CD4+T_cells
GPR171	0	1.39036	0.415	0.096	0	CD4+T_cells
TMEM66	0	1.38906	0.475	0.252	0	CD4+T_cells
IFNG	0	1.38885	0.224	0.087	0	CD4+T_cells
CREM	0	1.37838	0.541	0.351	0	CD4+T_cells
BTG1	0	1.3519	0.949	0.811	0	CD4+T_cells
TRBC2	0	1.34731	0.287	0.088	0	CD4+T_cells
AC092580.4	0	1.33516	0.429	0.127	0	CD4+T_cells
IL2RG	0	1.3324	0.652	0.305	0	CD4+T_cells
TRAT1	0	1.32941	0.385	0.074	0	CD4+T_cells
TRBC1	0	1.28591	0.205	0.06	0	CD4+T_cells
RGS1	0	1.28217	0.691	0.368	0	CD4+T_cells
LCK	0	1.26977	0.553	0.17	0	CD4+T_cells
PTPRC	0	1.25122	0.821	0.455	0	CD4+T_cells
CXCR6	0	1.22863	0.306	0.067	0	CD4+T_cells
CD3G	0	1.22104	0.503	0.138	0	CD4+T_cells
ICOS	0	1.22016	0.266	0.044	0	CD4+T_cells
ARHGDIB	0	1.21659	0.896	0.582	0	CD4+T_cells
PTPRCAP	0	1.21422	0.45	0.158	0	CD4+T_cells
EVL	0	1.2041	0.653	0.367	0	CD4+T_cells
BIRC3	0	1.17641	0.468	0.241	0	CD4+T_cells
ACAP1	0	1.17187	0.514	0.196	0	CD4+T_cells
CYTIP	0	1.16575	0.614	0.331	0	CD4+T_cells
TUBA4A	0	1.14392	0.491	0.236	0	CD4+T_cells
PIK3IP1	0	1.14011	0.428	0.183	0	CD4+T_cells
CD96	0	1.13992	0.41	0.116	0	CD4+T_cells
CORO1A	0	1.13369	0.793	0.389	0	CD4+T_cells
STK4	0	1.12149	0.572	0.337	0	CD4+T_cells
RHOH	0	1.11478	0.431	0.158	0	CD4+T_cells
TNFAIP3	0	1.1109	0.582	0.349	0	CD4+T_cells
GZMA	0	1.1015	0.589	0.242	0	CD4+T_cells
CD40LG	0	1.10147	0.235	0.026	0	CD4+T_cells
CCL5	0	1.10013	0.761	0.311	0	CD4+T_cells
CDC42SE2	0	1.08268	0.507	0.303	0	CD4+T_cells
CD52	0	1.06898	0.9	0.503	0	CD4+T_cells
PPP2R5C	0	1.06221	0.544	0.345	0	CD4+T_cells
CCL20	1.12e-101	1.86973	0.128	0.071	2.96e-97	CD4+T_cells
GNLY	0	4.20878	0.548	0.085	0	NK_cells
NKG7	0	3.49751	0.951	0.266	0	NK_cells
FGFBP2	0	3.07179	0.551	0.025	0	NK_cells
GZMB	0	3.04044	0.729	0.115	0	NK_cells
PRF1	0	2.8669	0.82	0.136	0	NK_cells
KLRD1	0	2.66705	0.812	0.111	0	NK_cells
KLRF1	0	2.38941	0.488	0.025	0	NK_cells
GZMH	0	2.31147	0.725	0.158	0	NK_cells
CTSW	0	2.30805	0.802	0.177	0	NK_cells
CCL4	0	2.25667	0.888	0.363	0	NK_cells
GZMA	0	2.20612	0.892	0.247	0	NK_cells
CD7	0	2.17807	0.754	0.194	0	NK_cells
SPON2	0	2.17341	0.527	0.132	0	NK_cells
CCL5	0	2.12704	0.909	0.338	0	NK_cells
CMC1	0	2.11901	0.571	0.234	0	NK_cells
CST7	0	2.09061	0.885	0.251	0	NK_cells
CD247	0	1.95834	0.64	0.117	0	NK_cells
CCL3	0	1.90501	0.512	0.201	0	NK_cells
CLIC3	0	1.88835	0.497	0.096	0	NK_cells
CORO1A	0	1.64767	0.871	0.418	0	NK_cells
XCL2	0	1.56578	0.32	0.058	0	NK_cells
RAC2	0	1.51494	0.783	0.34	0	NK_cells
GZMM	0	1.46701	0.658	0.162	0	NK_cells
BIN2	0	1.41876	0.612	0.194	0	NK_cells
HCST	0	1.41434	0.898	0.464	0	NK_cells
TRDC	0	1.37674	0.161	0.012	0	NK_cells
UBE2C	0	1.36565	0.193	0.016	0	NK_cells
PTPRCAP	0	1.33966	0.499	0.18	0	NK_cells
IL32	0	1.33346	0.774	0.486	0	NK_cells
PLAC8	0	1.33342	0.501	0.173	0	NK_cells
PFN1	0	1.33189	0.969	0.861	0	NK_cells
HOPX	0	1.29227	0.58	0.166	0	NK_cells
FCGR3A	0	1.26669	0.471	0.206	0	NK_cells
KLRB1	0	1.25575	0.718	0.223	0	NK_cells
LIMD2	0	1.25197	0.633	0.268	0	NK_cells
LCK	0	1.24947	0.644	0.196	0	NK_cells
IL2RB	0	1.23955	0.354	0.056	0	NK_cells
ITGB2	0	1.2283	0.784	0.402	0	NK_cells
PYHIN1	0	1.22438	0.414	0.08	0	NK_cells
APOBEC3G	0	1.22065	0.55	0.19	0	NK_cells
MATK	0	1.20336	0.443	0.086	0	NK_cells
IL2RG	0	1.19256	0.723	0.329	0	NK_cells
S1PR5	0	1.1923	0.318	0.027	0	NK_cells
XCL1	0	1.19042	0.188	0.042	0	NK_cells
KLRC1	0	1.15674	0.21	0.027	0	NK_cells
HIST1H4C	6.3e-266	2.24443	0.499	0.342	1.67e-261	NK_cells
HMGB2	3.17e-233	1.69142	0.56	0.437	8.37e-229	NK_cells
CCL4L2	1.48e-196	1.47585	0.191	0.075	3.9e-192	NK_cells
STMN1	1.64e-85	1.74968	0.337	0.27	4.35e-81	NK_cells
TUBA1B	0.000116361	1.25991	0.544	0.626	1	NK_cells
TPSAB1	0	7.74256	0.958	0.012	0	Mast_cells
TPSB2	0	7.15283	0.555	0.013	0	Mast_cells
CPA3	0	4.35987	0.907	0.005	0	Mast_cells
AREG	0	3.85829	0.735	0.186	0	Mast_cells
HPGDS	0	3.6445	0.895	0.022	0	Mast_cells
KIT	0	3.34826	0.844	0.009	0	Mast_cells
CTSG	0	3.23288	0.282	0.002	0	Mast_cells
MS4A2	0	3.10651	0.683	0.001	0	Mast_cells
GATA2	0	3.01193	0.744	0.017	0	Mast_cells
HPGD	0	2.87481	0.727	0.101	0	Mast_cells
C1orf186	0	2.75185	0.686	0.011	0	Mast_cells
RGS13	0	2.73909	0.733	0.005	0	Mast_cells
IL1RL1	0	2.61263	0.723	0.012	0	Mast_cells
VWA5A	0	2.58321	0.744	0.039	0	Mast_cells
LTC4S	0	2.54916	0.752	0.057	0	Mast_cells
HDC	0	2.32298	0.587	0.001	0	Mast_cells
SLC18A2	0	2.26688	0.638	0.003	0	Mast_cells
ADCYAP1	0	2.18758	0.188	0.001	0	Mast_cells
RP11-354E11.2	0	1.71831	0.494	0.001	0	Mast_cells
MAOB	0	1.65649	0.54	0.06	0	Mast_cells
SLC26A2	0	1.64539	0.48	0.063	0	Mast_cells
RAB27B	0	1.50967	0.416	0.018	0	Mast_cells
PTGS1	0	1.41788	0.443	0.035	0	Mast_cells
SAMSN1	7.75e-261	1.94013	0.837	0.301	2.05e-256	Mast_cells
BATF	1.08e-248	1.82451	0.509	0.1	2.85e-244	Mast_cells
CLU	6.63e-246	1.46904	0.813	0.258	1.75e-241	Mast_cells
ACSL4	1.73e-227	1.44869	0.503	0.111	4.58e-223	Mast_cells
PTGS2	5.19e-220	1.35537	0.36	0.057	1.37e-215	Mast_cells
SOCS1	3.68e-209	1.91265	0.555	0.144	9.73e-205	Mast_cells
RGS2	5.77e-204	2.14468	0.827	0.373	1.52e-199	Mast_cells
CAPG	5.97e-199	1.39847	0.806	0.296	1.58e-194	Mast_cells
RGS1	1.22e-196	1.90071	0.893	0.414	3.22e-192	Mast_cells
LAPTM4A	3.92e-194	1.7185	0.917	0.595	1.04e-189	Mast_cells
CD9	3.15e-182	1.5416	0.844	0.372	8.33e-178	Mast_cells
CD69	1.33e-178	1.50155	0.883	0.392	3.52e-174	Mast_cells
ALOX5AP	2.1e-178	1.56817	0.898	0.424	5.56e-174	Mast_cells
ARHGAP18	1e-165	1.51951	0.621	0.224	2.64e-161	Mast_cells
CTNNBL1	5.99e-165	1.37063	0.553	0.175	1.58e-160	Mast_cells
SRGN	2.07e-156	1.35422	0.985	0.726	5.48e-152	Mast_cells
ALAS1	1.51e-142	1.75289	0.379	0.093	3.99e-138	Mast_cells
CPM	4.48e-128	1.40961	0.537	0.188	1.18e-123	Mast_cells
ANXA1	3.1e-121	1.65528	0.919	0.664	8.19e-117	Mast_cells
NFKBIA	3.75e-114	1.67794	0.907	0.757	9.91e-110	Mast_cells
FOSB	1.97e-107	1.49486	0.813	0.508	5.2e-103	Mast_cells
LMO4	1.9e-99	1.36829	0.553	0.246	5.02e-95	Mast_cells
MT-ND4L	1.82e-95	1.60059	0.716	0.459	4.82e-91	Mast_cells
LMNA	7.85e-71	1.7637	0.723	0.483	2.08e-66	Mast_cells
DDIT4	2.01e-53	1.3694	0.711	0.55	5.3e-49	Mast_cells
BIRC3	6.46e-50	1.52145	0.508	0.274	1.71e-45	Mast_cells
JUND	1e-47	1.59273	0.674	0.534	2.66e-43	Mast_cells
