# Supplementary material for: Single-cell analysis reveals the COL11A1+ fibroblasts are cancer-specific fibroblasts that promote tumor progression
Source: Front Pharmacol. 2023 Jan 20;14:1121586. doi: 10.3389/fphar.2023.1121586 (PMC9894880; doi:10.3389/fphar.2023.1121586)
Supplement: Supplementary file 6 [file Table1.XLSX]

## Sheet: Table S1
Supplementary Table S1. The information of integrated scRNA-seq datasets
Dataset_ID	Cancer Type	Number of Patients	Number of Samples	Number of Tumors	Number of Adj_Normal_Tissues	Sources of Articles (DOI)	Sources of Datasets
1	prostate cancer (PCa)	12	13	13	0	10.1038/s41556-020-00613-6	GEO: GSE141445
2	ovarian cancer (OVC)	7	12	9	3	10.1186/s13073-021-00922-x	https://lambrechtslab.sites.vib.be/en/data-access
3	ovarian cancer (OVC)	5	10	7	3	10.1038/s41422-020-0355-0	https://lambrechtslab.sites.vib.be/en/data-access
4	breast cancer (BC)	14	14	14	0	10.1038/s41422-020-0355-0	https://lambrechtslab.sites.vib.be/en/data-access
5	colorectal cancer (CRC)	7	21	14	7	10.1038/s41422-020-0355-0	https://lambrechtslab.sites.vib.be/en/data-access
6	lung cancer (LC)	8	36	29	7	10.1038/s41422-020-0355-0	https://lambrechtslab.sites.vib.be/en/data-access
7	pancreatic ductal adenocarcinoma (PDAC)	16	19	16	3	10.1038/s43018-020-00121-4	GEO: GSE155698
8	hepatocellular carcinoma and intrahepatic cholangiocarcinoma (HCC and ICC)	19	19	19	0	10.1016/j.ccell.2019.08.007	GEO: GSE125449
9	intrahepatic cholangiocarcinoma (ICC)	5	8	5	3	10.1016/j.jhep.2020.05.039	GEO: GSE138709, GSE142784
10	intrahepatic cholangiocarcinoma (ICC)	1	1	1	0	10.1016/j.ccell.2021.03.012	GEO: GSE154170
