# Supplementary material for: Single-cell analysis reveals the COL11A1+ fibroblasts are cancer-specific fibroblasts that promote tumor progression
Source: Front Pharmacol. 2023 Jan 20;14:1121586. doi: 10.3389/fphar.2023.1121586 (PMC9894880; doi:10.3389/fphar.2023.1121586)
Supplement: Supplementary file 7 [file Table5.XLSX]

## Sheet: Table S5
Supplementary Table S5. Top 50 differentially expressed genes of each fibroblast subtype across normal tissues and tumors
gene	p_val	avg_log2FC	pct.1	pct.2	p_val_adj	cluster
IGKC	5.32e-27	1.64906	0.355	0.451	1.83e-22	BAMBI_FB
BAMBI	5.08e-256	1.50216	0.272	0.103	1.75e-251	BAMBI_FB
CYTL1	4.21e-153	1.47454	0.112	0.027	1.45e-148	BAMBI_FB
STAR	3.35e-276	1.32402	0.188	0.043	1.15e-271	BAMBI_FB
JCHAIN	2.82e-122	1.22026	0.054	0.205	9.7e-118	BAMBI_FB
RBP1	5.6e-93	1.07886	0.566	0.533	1.93e-88	BAMBI_FB
COL9A3	2.66e-275	1.04908	0.185	0.042	9.15e-271	BAMBI_FB
MTRNR2L8	2.85e-16	1.0352	0.165	0.232	9.82e-12	BAMBI_FB
EDN3	0	1.00842	0.139	0.012	0	BAMBI_FB
SOX4	3.06e-24	0.977912	0.543	0.64	1.05e-19	BAMBI_FB
S100A1	3.71e-230	0.937326	0.189	0.053	1.28e-225	BAMBI_FB
IGHA1	4.88e-98	0.912961	0.12	0.267	1.68e-93	BAMBI_FB
CPVL	2.19e-26	0.835512	0.195	0.149	7.55e-22	BAMBI_FB
DKK1	1.85e-139	0.833344	0.128	0.037	6.38e-135	BAMBI_FB
MLLT11	4.55e-45	0.808954	0.281	0.229	1.57e-40	BAMBI_FB
ITM2C	1.36e-08	0.799843	0.476	0.601	0.000468752	BAMBI_FB
CD24	2.47e-80	0.788588	0.224	0.132	8.51e-76	BAMBI_FB
MARCKSL1	1.02e-72	0.763113	0.546	0.538	3.52e-68	BAMBI_FB
H3F3A	1.2e-16	0.754152	0.658	0.803	4.12e-12	BAMBI_FB
STMN1	3.4e-84	0.753093	0.424	0.35	1.17e-79	BAMBI_FB
LHX9	0	0.743999	0.169	0.023	0	BAMBI_FB
IGLC2	5.47e-29	0.733828	0.166	0.252	1.88e-24	BAMBI_FB
HMGN3	3.53e-14	0.732669	0.518	0.657	1.21e-09	BAMBI_FB
TNNT1	6.06e-307	0.727774	0.188	0.039	2.09e-302	BAMBI_FB
BMP7	5.3e-216	0.726845	0.192	0.058	1.82e-211	BAMBI_FB
MSX2	3.16e-192	0.721124	0.173	0.052	1.09e-187	BAMBI_FB
MDK	8.19e-150	0.71976	0.729	0.721	2.82e-145	BAMBI_FB
KCNQ1OT1	3.06e-16	0.715546	0.49	0.558	1.05e-11	BAMBI_FB
PEG10	5.83e-209	0.710391	0.227	0.081	2.01e-204	BAMBI_FB
TUBB2B	2.11e-225	0.703976	0.191	0.056	7.28e-221	BAMBI_FB
FHL2	0.000746108	0.702182	0.357	0.486	1	BAMBI_FB
WIF1	0	0.685417	0.15	0.019	0	BAMBI_FB
PEG3	4.32e-80	0.683385	0.165	0.082	1.49e-75	BAMBI_FB
SNRPE	6.7e-13	0.677767	0.513	0.659	2.3e-08	BAMBI_FB
ST13	4.82e-36	0.64417	0.64	0.772	1.66e-31	BAMBI_FB
MT-ND1	9.79e-74	0.643994	0.902	0.961	3.37e-69	BAMBI_FB
NGFRAP1	5.32e-85	0.639576	0.7	0.827	1.83e-80	BAMBI_FB
DLX5	2.24e-184	0.639228	0.158	0.045	7.72e-180	BAMBI_FB
C6orf48	1.71e-70	0.634515	0.641	0.724	5.89e-66	BAMBI_FB
RPL35A	0	0.632177	0.937	0.983	0	BAMBI_FB
MTRNR2L12	0.000945118	0.630174	0.29	0.329	1	BAMBI_FB
IGLC3	3.71e-22	0.628034	0.11	0.172	1.28e-17	BAMBI_FB
BEX1	0	0.613329	0.169	0.023	0	BAMBI_FB
MEX3A	5.11e-163	0.584606	0.195	0.074	1.76e-158	BAMBI_FB
RNASE1	1.2e-58	0.584449	0.235	0.156	4.13e-54	BAMBI_FB
RPS12	3.29e-202	0.578883	0.958	0.99	1.13e-197	BAMBI_FB
PCSK1N	1.4e-113	0.578016	0.192	0.086	4.82e-109	BAMBI_FB
HNRNPA1	7.77e-125	0.576337	0.795	0.904	2.67e-120	BAMBI_FB
GABPB1-AS1	2.73e-33	0.567174	0.313	0.268	9.39e-29	BAMBI_FB
HS3ST1	7.96e-132	0.553558	0.158	0.056	2.74e-127	BAMBI_FB
HP	0	2.52038	0.273	0.025	0	CLDN1_FB
SLPI	3.26e-275	2.39035	0.44	0.177	1.12e-270	CLDN1_FB
KRT19	0	2.17877	0.64	0.185	0	CLDN1_FB
ITLN1	0	2.00457	0.173	0.023	0	CLDN1_FB
KRT18	0	1.93052	0.733	0.279	0	CLDN1_FB
KRT8	0	1.86038	0.753	0.291	0	CLDN1_FB
PRG4	0	1.55981	0.217	0.031	0	CLDN1_FB
EGFL6	0	1.55154	0.57	0.107	0	CLDN1_FB
TM4SF1	0	1.52177	0.687	0.297	0	CLDN1_FB
MT1E	0	1.47084	0.913	0.594	0	CLDN1_FB
SAA1	6.48e-93	1.31469	0.126	0.039	2.23e-88	CLDN1_FB
RARRES1	0	1.30253	0.858	0.386	0	CLDN1_FB
CLDN1	0	1.29621	0.52	0.038	0	CLDN1_FB
CALB2	0	1.23907	0.37	0.038	0	CLDN1_FB
KLF6	2.13e-282	1.22785	0.828	0.595	7.32e-278	CLDN1_FB
SGK1	0	1.21189	0.55	0.195	0	CLDN1_FB
PTGIS	0	1.2096	0.787	0.268	0	CLDN1_FB
SAT1	0	1.20241	0.972	0.794	0	CLDN1_FB
CFB	0	1.16441	0.449	0.115	0	CLDN1_FB
UPK3B	0	1.15806	0.195	0.007	0	CLDN1_FB
C3	0	1.15439	0.914	0.461	0	CLDN1_FB
GAS1	0	1.10903	0.689	0.345	0	CLDN1_FB
PLA2G2A	1.42e-262	1.07031	0.442	0.166	4.9e-258	CLDN1_FB
SERPINE1	1.46e-289	1.05978	0.515	0.22	5.03e-285	CLDN1_FB
APOE	2.52e-207	1.05587	0.731	0.464	8.67e-203	CLDN1_FB
MT2A	0	1.03936	0.972	0.81	0	CLDN1_FB
CXCL2	2.52e-262	1.03501	0.339	0.107	8.67e-258	CLDN1_FB
HAS1	0	1.02451	0.357	0.068	0	CLDN1_FB
MT1G	5.77e-72	1.02348	0.19	0.085	1.99e-67	CLDN1_FB
LXN	0	1.01775	0.784	0.338	0	CLDN1_FB
DUSP1	7.42e-165	1.01208	0.837	0.653	2.56e-160	CLDN1_FB
IGF1	0	0.989822	0.692	0.33	0	CLDN1_FB
MEST	0	0.980496	0.709	0.231	0	CLDN1_FB
CAV1	8.15e-294	0.973241	0.802	0.513	2.81e-289	CLDN1_FB
CCDC80	0	0.956129	0.961	0.777	0	CLDN1_FB
ERRFI1	5.17e-269	0.953023	0.626	0.323	1.78e-264	CLDN1_FB
DES	0	0.92748	0.522	0.086	0	CLDN1_FB
SOD2	5.86e-248	0.926596	0.769	0.492	2.02e-243	CLDN1_FB
S100A10	0	0.91605	0.966	0.804	0	CLDN1_FB
TFPI2	0	0.908491	0.386	0.088	0	CLDN1_FB
CRABP2	3.37e-150	0.906561	0.612	0.37	1.16e-145	CLDN1_FB
CYR61	1.7e-135	0.883305	0.737	0.552	5.85e-131	CLDN1_FB
SLC12A8	0	0.876405	0.559	0.165	0	CLDN1_FB
MSLN	0	0.873287	0.366	0.05	0	CLDN1_FB
WT1	0	0.870599	0.57	0.112	0	CLDN1_FB
CXCL6	0	0.855818	0.276	0.031	0	CLDN1_FB
PIM1	0	0.835491	0.577	0.217	0	CLDN1_FB
NNMT	0	0.832893	0.948	0.701	0	CLDN1_FB
ANGPTL4	7.94e-274	0.811586	0.435	0.161	2.73e-269	CLDN1_FB
EZR	0	0.80437	0.469	0.161	0	CLDN1_FB
MMP11	0	2.6139	0.712	0.194	0	COL11A1_FB
FN1	0	2.26836	0.964	0.701	0	COL11A1_FB
POSTN	0	2.11381	0.827	0.262	0	COL11A1_FB
COL11A1	0	1.9221	0.633	0.099	0	COL11A1_FB
CTHRC1	0	1.91531	0.954	0.473	0	COL11A1_FB
COL10A1	0	1.8528	0.668	0.114	0	COL11A1_FB
MMP1	2.83e-150	1.78153	0.109	0.029	9.75e-146	COL11A1_FB
COMP	0	1.67562	0.364	0.09	0	COL11A1_FB
COL1A1	0	1.6635	0.989	0.851	0	COL11A1_FB
COL12A1	0	1.635	0.794	0.392	0	COL11A1_FB
COL5A2	0	1.61722	0.942	0.555	0	COL11A1_FB
ISG15	0	1.49111	0.702	0.333	0	COL11A1_FB
SULF1	0	1.48219	0.797	0.318	0	COL11A1_FB
IFI27	0	1.47488	0.791	0.525	0	COL11A1_FB
THBS2	0	1.462	0.893	0.474	0	COL11A1_FB
AEBP1	0	1.45444	0.949	0.721	0	COL11A1_FB
COL5A1	0	1.4541	0.914	0.5	0	COL11A1_FB
COL1A2	0	1.45133	0.992	0.897	0	COL11A1_FB
INHBA	0	1.37415	0.755	0.21	0	COL11A1_FB
SPARC	0	1.37219	0.987	0.873	0	COL11A1_FB
IFI6	0	1.34071	0.753	0.467	0	COL11A1_FB
CST1	2.13e-140	1.32684	0.101	0.026	7.33e-136	COL11A1_FB
COL3A1	0	1.31224	0.985	0.809	0	COL11A1_FB
SDC1	0	1.29953	0.542	0.116	0	COL11A1_FB
VCAN	0	1.2963	0.932	0.587	0	COL11A1_FB
MMP14	0	1.26979	0.889	0.518	0	COL11A1_FB
TIMP3	4.43e-174	1.23091	0.754	0.623	1.53e-169	COL11A1_FB
MYH9	0	1.18138	0.869	0.436	0	COL11A1_FB
ANTXR1	0	1.17503	0.824	0.412	0	COL11A1_FB
COL6A3	0	1.14277	0.966	0.709	0	COL11A1_FB
PLAU	0	1.14065	0.588	0.193	0	COL11A1_FB
COL6A1	0	1.13371	0.952	0.83	0	COL11A1_FB
TAGLN	0	1.13135	0.874	0.581	0	COL11A1_FB
LRRC15	0	1.12878	0.439	0.06	0	COL11A1_FB
MXRA5	0	1.12411	0.801	0.379	0	COL11A1_FB
MFAP2	0	1.11123	0.732	0.33	0	COL11A1_FB
COL8A1	0	1.09927	0.783	0.368	0	COL11A1_FB
ACTA2	0	1.09732	0.8	0.513	0	COL11A1_FB
THY1	0	1.09462	0.912	0.56	0	COL11A1_FB
GJB2	0	1.08824	0.494	0.076	0	COL11A1_FB
ADAM12	0	1.08638	0.637	0.163	0	COL11A1_FB
CTSB	0	1.08367	0.924	0.605	0	COL11A1_FB
RAB31	0	1.0726	0.787	0.361	0	COL11A1_FB
BGN	0	1.01758	0.968	0.643	0	COL11A1_FB
TPM1	0	0.990674	0.913	0.679	0	COL11A1_FB
ISLR	0	0.967723	0.861	0.571	0	COL11A1_FB
CTSK	0	0.951545	0.879	0.612	0	COL11A1_FB
FLNA	0	0.943262	0.88	0.565	0	COL11A1_FB
PALLD	0	0.932663	0.82	0.442	0	COL11A1_FB
TPM4	0	0.932072	0.948	0.705	0	COL11A1_FB
ADAMDEC1	0	5.54481	0.522	0.021	0	CXCL14_FB
CCL13	0	4.16056	0.282	0.011	0	CXCL14_FB
CXCL14	0	3.32375	0.835	0.312	0	CXCL14_FB
CCL8	0	2.81726	0.264	0.012	0	CXCL14_FB
CCL11	2.28e-136	2.74631	0.326	0.103	7.85e-132	CXCL14_FB
CTSC	3.16e-241	2.04146	0.693	0.352	1.09e-236	CXCL14_FB
F3	6.14e-90	1.99188	0.465	0.267	2.11e-85	CXCL14_FB
STMN2	0	1.87881	0.359	0.033	0	CXCL14_FB
CXCL1	4.42e-109	1.80603	0.267	0.083	1.52e-104	CXCL14_FB
FABP5	9.7e-40	1.79472	0.384	0.274	3.34e-35	CXCL14_FB
ADAM28	0	1.76236	0.36	0.014	0	CXCL14_FB
PLAT	1.16e-106	1.74787	0.601	0.416	3.98e-102	CXCL14_FB
GADD45G	1.31e-233	1.71433	0.408	0.108	4.5e-229	CXCL14_FB
C8orf4	1.58e-195	1.63441	0.509	0.188	5.43e-191	CXCL14_FB
APOE	7.52e-74	1.5996	0.636	0.489	2.59e-69	CXCL14_FB
BMP4	1.35e-180	1.56925	0.536	0.24	4.63e-176	CXCL14_FB
LINC01082	0	1.5559	0.405	0.05	0	CXCL14_FB
PTCH1	0	1.54998	0.436	0.075	0	CXCL14_FB
HAPLN1	0	1.53646	0.329	0.018	0	CXCL14_FB
TMEM176B	3.59e-207	1.53141	0.802	0.586	1.24e-202	CXCL14_FB
DMKN	1.51e-58	1.46735	0.391	0.239	5.19e-54	CXCL14_FB
PPP1R14A	0	1.46581	0.632	0.186	0	CXCL14_FB
ABCA8	4.43e-63	1.42772	0.446	0.285	1.53e-58	CXCL14_FB
IGHA1	0	1.41271	0.706	0.218	0	CXCL14_FB
TCF21	4.6e-149	1.39702	0.531	0.253	1.58e-144	CXCL14_FB
EDNRB	5.65e-272	1.39206	0.433	0.106	1.95e-267	CXCL14_FB
A2M	8.43e-264	1.36571	0.747	0.341	2.9e-259	CXCL14_FB
NSG1	0	1.35429	0.316	0.048	0	CXCL14_FB
FOXF1	0	1.33601	0.455	0.108	0	CXCL14_FB
EDIL3	4.69e-142	1.30709	0.5	0.231	1.61e-137	CXCL14_FB
JUN	9.64e-157	1.28279	0.911	0.778	3.32e-152	CXCL14_FB
PITX1	0	1.24885	0.314	0.025	0	CXCL14_FB
FENDRR	0	1.22601	0.362	0.044	0	CXCL14_FB
TMEM176A	1.33e-149	1.22576	0.733	0.528	4.59e-145	CXCL14_FB
TFPI2	4.8e-08	1.20931	0.167	0.121	0.00165196	CXCL14_FB
BMP5	0	1.1992	0.33	0.027	0	CXCL14_FB
PDGFRA	2.1e-51	1.19325	0.633	0.582	7.23e-47	CXCL14_FB
FABP4	1.34e-35	1.159	0.205	0.099	4.62e-31	CXCL14_FB
HSD17B2	0	1.15727	0.237	0.008	0	CXCL14_FB
CXCR4	8.46e-94	1.15555	0.256	0.087	2.91e-89	CXCL14_FB
LTBP4	1.46e-104	1.14951	0.73	0.563	5.01e-100	CXCL14_FB
TRPA1	0	1.13789	0.265	0.014	0	CXCL14_FB
SOX6	8.11e-127	1.12987	0.269	0.078	2.79e-122	CXCL14_FB
SCARA5	1.17e-152	1.0826	0.379	0.121	4.03e-148	CXCL14_FB
RGS10	1.26e-71	1.08081	0.512	0.37	4.33e-67	CXCL14_FB
SLC2A3	2.16e-54	1.07948	0.482	0.334	7.43e-50	CXCL14_FB
CP	1.21e-98	1.07472	0.227	0.067	4.17e-94	CXCL14_FB
PROCR	2.92e-101	1.06884	0.517	0.294	1e-96	CXCL14_FB
CEBPD	2.97e-99	1.05739	0.678	0.483	1.02e-94	CXCL14_FB
HSPA1A	3.71e-57	1.04551	0.608	0.487	1.28e-52	CXCL14_FB
CFD	0	4.00767	0.74	0.199	0	DPT_FB
GSN	0	2.80209	0.94	0.765	0	DPT_FB
DPT	0	2.69667	0.755	0.335	0	DPT_FB
ADH1B	0	2.66299	0.733	0.142	0	DPT_FB
APOD	0	2.51661	0.635	0.344	0	DPT_FB
IGFBP6	0	2.48976	0.823	0.614	0	DPT_FB
PI16	0	2.36863	0.389	0.018	0	DPT_FB
MFAP5	0	2.35765	0.479	0.244	0	DPT_FB
MGP	0	2.31688	0.969	0.704	0	DPT_FB
GPX3	0	2.2988	0.709	0.263	0	DPT_FB
PLAC9	0	2.17039	0.729	0.373	0	DPT_FB
TNXB	0	2.05182	0.672	0.129	0	DPT_FB
PLA2G2A	0	1.94816	0.406	0.137	0	DPT_FB
DCN	0	1.82909	0.999	0.936	0	DPT_FB
MGST1	0	1.76627	0.606	0.191	0	DPT_FB
MFAP4	0	1.75177	0.87	0.613	0	DPT_FB
OGN	0	1.73499	0.727	0.299	0	DPT_FB
SRPX	0	1.72381	0.677	0.317	0	DPT_FB
C7	0	1.71509	0.58	0.242	0	DPT_FB
S100A4	0	1.70626	0.806	0.578	0	DPT_FB
EFEMP1	0	1.64879	0.786	0.465	0	DPT_FB
ITM2A	0	1.60589	0.62	0.163	0	DPT_FB
FBLN1	0	1.56185	0.913	0.685	0	DPT_FB
WISP2	0	1.54681	0.481	0.143	0	DPT_FB
PLPP3	0	1.52362	0.701	0.294	0	DPT_FB
PCOLCE2	0	1.51641	0.404	0.104	0	DPT_FB
SFRP1	0	1.48692	0.436	0.124	0	DPT_FB
PTGDS	6.58e-81	1.46073	0.487	0.419	2.26e-76	DPT_FB
CXCL12	0	1.43067	0.819	0.475	0	DPT_FB
FBLN5	0	1.40523	0.698	0.352	0	DPT_FB
CCDC80	0	1.39385	0.912	0.765	0	DPT_FB
CLU	0	1.36492	0.743	0.525	0	DPT_FB
GPNMB	0	1.32564	0.72	0.484	0	DPT_FB
C3	0	1.31476	0.775	0.437	0	DPT_FB
SOD3	0	1.30884	0.764	0.427	0	DPT_FB
FXYD1	0	1.30593	0.744	0.319	0	DPT_FB
SFRP2	0	1.28981	0.7	0.48	0	DPT_FB
CST3	0	1.26713	0.984	0.94	0	DPT_FB
LTBP4	0	1.2357	0.776	0.51	0	DPT_FB
ALDH1A1	0	1.23378	0.598	0.27	0	DPT_FB
C10orf10	1.7e-66	1.22165	0.312	0.225	5.85e-62	DPT_FB
SEPP1	0	1.19814	0.9	0.609	0	DPT_FB
GPC3	4.18e-280	1.19554	0.403	0.201	1.44e-275	DPT_FB
SCARA5	0	1.18461	0.421	0.047	0	DPT_FB
C1QTNF3	0	1.18399	0.438	0.166	0	DPT_FB
PDK4	0	1.17938	0.533	0.2	0	DPT_FB
CHRDL1	0	1.16681	0.44	0.052	0	DPT_FB
C1R	0	1.16548	0.936	0.822	0	DPT_FB
HBB	1.07e-186	1.16443	0.285	0.132	3.67e-182	DPT_FB
SVEP1	0	1.15787	0.489	0.193	0	DPT_FB
C11orf96	0	3.34552	0.724	0.212	0	RGS5_FB
RGS5	0	2.97046	0.451	0.082	0	RGS5_FB
HSPA1A	0	2.25693	0.741	0.461	0	RGS5_FB
MTRNR2L1	1.76e-11	1.86739	0.148	0.11	6.07e-07	RGS5_FB
COLEC11	0	1.8411	0.437	0.089	0	RGS5_FB
MYH11	0	1.64807	0.253	0.044	0	RGS5_FB
CCL21	7.3e-195	1.61743	0.174	0.039	2.51e-190	RGS5_FB
JUND	0	1.59903	0.779	0.514	0	RGS5_FB
IGFBP7	0	1.58752	0.977	0.891	0	RGS5_FB
HSPA1B	1.98e-244	1.57531	0.602	0.331	6.83e-240	RGS5_FB
DNAJB1	3.38e-225	1.55542	0.68	0.439	1.16e-220	RGS5_FB
NDUFA4L2	0	1.5157	0.344	0.096	0	RGS5_FB
ADIRF	1.44e-51	1.41045	0.594	0.49	4.95e-47	RGS5_FB
HES1	0	1.38443	0.589	0.249	0	RGS5_FB
CEBPB	3.44e-240	1.34834	0.68	0.451	1.18e-235	RGS5_FB
HSP90AA1	4.19e-267	1.34387	0.94	0.847	1.44e-262	RGS5_FB
CEBPD	8.14e-193	1.34384	0.678	0.468	2.8e-188	RGS5_FB
ATF3	0	1.32107	0.578	0.237	0	RGS5_FB
PPP1R14A	0	1.25335	0.558	0.163	0	RGS5_FB
COL4A2	0	1.24782	0.716	0.415	0	RGS5_FB
HIGD1B	0	1.24329	0.158	0.014	0	RGS5_FB
COL4A1	0	1.23778	0.677	0.356	0	RGS5_FB
MT1M	3.27e-18	1.23328	0.355	0.289	1.13e-13	RGS5_FB
GADD45B	1.82e-196	1.20841	0.784	0.573	6.27e-192	RGS5_FB
AGT	0	1.18772	0.269	0.057	0	RGS5_FB
RACK1	0	1.17604	0.106	0.005	0	RGS5_FB
RGS16	1.72e-220	1.16861	0.452	0.204	5.94e-216	RGS5_FB
GEM	1.46e-294	1.14786	0.593	0.288	5.02e-290	RGS5_FB
IER3	4.74e-162	1.13734	0.575	0.357	1.63e-157	RGS5_FB
UQCR11.1	0	1.13512	0.431	0.065	0	RGS5_FB
FOSB	2.68e-189	1.09996	0.774	0.562	9.22e-185	RGS5_FB
DNAJA1	3.72e-213	1.08857	0.768	0.582	1.28e-208	RGS5_FB
TINAGL1	0	1.04955	0.299	0.048	0	RGS5_FB
CD81	2.95e-178	1.0484	0.756	0.634	1.02e-173	RGS5_FB
NOTCH3	6.98e-300	1.04043	0.529	0.229	2.4e-295	RGS5_FB
TAGLN	4.07e-129	1.02197	0.818	0.653	1.4e-124	RGS5_FB
PHLDA1	9.4e-275	1.01838	0.722	0.425	3.24e-270	RGS5_FB
IGFBP3	0.00185098	1.00659	0.39	0.378	1	RGS5_FB
KLF2	6.83e-170	0.978475	0.474	0.245	2.35e-165	RGS5_FB
MT1X	6.5e-39	0.976277	0.629	0.523	2.24e-34	RGS5_FB
NR4A1	7.99e-232	0.970177	0.696	0.39	2.75e-227	RGS5_FB
ACTA2	6.31e-120	0.959696	0.745	0.583	2.17e-115	RGS5_FB
TIMP1	6.72e-37	0.953286	0.949	0.94	2.31e-32	RGS5_FB
GJA4	0	0.945273	0.211	0.016	0	RGS5_FB
YBX3	6.36e-162	0.938676	0.688	0.531	2.19e-157	RGS5_FB
HSPH1	7.48e-120	0.930157	0.46	0.28	2.57e-115	RGS5_FB
SERTAD1	5.3e-190	0.929703	0.552	0.32	1.82e-185	RGS5_FB
HES4	0	0.928948	0.489	0.168	0	RGS5_FB
HSPA6	1.34e-153	0.923145	0.143	0.033	4.62e-149	RGS5_FB
MAP1B	1.26e-203	0.922453	0.62	0.375	4.33e-199	RGS5_FB
