# Supplementary material for: Single-cell analysis reveals the COL11A1+ fibroblasts are cancer-specific fibroblasts that promote tumor progression
Source: Front Pharmacol. 2023 Jan 20;14:1121586. doi: 10.3389/fphar.2023.1121586 (PMC9894880; doi:10.3389/fphar.2023.1121586)
Supplement: Supplementary file 8 [file Table7.XLSX]

## Sheet: Additional File 8-Table S7
Supplementary Table S7: Proportions of fibroblast subtypes in total fibroblasts from each tissue type
Tissue type	FB subtype	Cell number	Proportion
BC	BAMBI_FB	676	0.175539
CRC	BAMBI_FB	165	0.0693277
CRC_Adj	BAMBI_FB	137	0.0490336
HCC_ICC	BAMBI_FB	83	0.254601
ICC	BAMBI_FB	66	0.0371831
ICC_Adj	BAMBI_FB	1	0.0227273
LC	BAMBI_FB	112	0.142857
LC_Adj	BAMBI_FB	25	0.0880282
OVC	BAMBI_FB	2120	0.294977
OVC_Adj	BAMBI_FB	893	0.302507
PDAC	BAMBI_FB	32	0.0248834
PDAC_Adj	BAMBI_FB	4	0.025641
PRAD	BAMBI_FB	297	0.352313
BC	CLDN1_FB	132	0.0342768
CRC	CLDN1_FB	354	0.148739
CRC_Adj	CLDN1_FB	65	0.0232641
HCC_ICC	CLDN1_FB	5	0.0153374
ICC	CLDN1_FB	233	0.131268
ICC_Adj	CLDN1_FB	1	0.0227273
LC	CLDN1_FB	125	0.159439
LC_Adj	CLDN1_FB	19	0.0669014
OVC	CLDN1_FB	1486	0.206762
OVC_Adj	CLDN1_FB	502	0.170054
PDAC	CLDN1_FB	12	0.00933126
PRAD	CLDN1_FB	8	0.00948992
BC	COL11A1_FB	2137	0.554921
CRC	COL11A1_FB	1088	0.457143
CRC_Adj	COL11A1_FB	39	0.0139585
HCC_ICC	COL11A1_FB	74	0.226994
ICC	COL11A1_FB	420	0.23662
LC	COL11A1_FB	392	0.5
LC_Adj	COL11A1_FB	17	0.0598592
OVC	COL11A1_FB	2656	0.369556
OVC_Adj	COL11A1_FB	73	0.024729
PDAC	COL11A1_FB	636	0.494557
PDAC_Adj	COL11A1_FB	5	0.0320513
PRAD	COL11A1_FB	43	0.0510083
BC	CXCL14_FB	45	0.0116853
CRC	CXCL14_FB	308	0.129412
CRC_Adj	CXCL14_FB	579	0.20723
HCC_ICC	CXCL14_FB	9	0.0276074
ICC	CXCL14_FB	36	0.0202817
LC	CXCL14_FB	4	0.00510204
OVC	CXCL14_FB	84	0.0116878
OVC_Adj	CXCL14_FB	18	0.00609756
PDAC	CXCL14_FB	21	0.0163297
PRAD	CXCL14_FB	19	0.0225386
BC	DPT_FB	752	0.195274
CRC	DPT_FB	417	0.17521
CRC_Adj	DPT_FB	1938	0.693629
HCC_ICC	DPT_FB	25	0.0766871
ICC	DPT_FB	146	0.0822535
ICC_Adj	DPT_FB	3	0.0681818
LC	DPT_FB	141	0.179847
LC_Adj	DPT_FB	215	0.757042
OVC	DPT_FB	602	0.0837623
OVC_Adj	DPT_FB	1293	0.438008
PDAC	DPT_FB	81	0.062986
PDAC_Adj	DPT_FB	5	0.0320513
PRAD	DPT_FB	58	0.0688019
BC	RGS5_FB	109	0.0283043
CRC	RGS5_FB	48	0.0201681
CRC_Adj	RGS5_FB	36	0.0128848
HCC_ICC	RGS5_FB	130	0.398773
ICC	RGS5_FB	874	0.492394
ICC_Adj	RGS5_FB	39	0.886364
LC	RGS5_FB	10	0.0127551
LC_Adj	RGS5_FB	8	0.028169
OVC	RGS5_FB	239	0.0332545
OVC_Adj	RGS5_FB	173	0.0586043
PDAC	RGS5_FB	504	0.391913
PDAC_Adj	RGS5_FB	142	0.910256
PRAD	RGS5_FB	418	0.495848
