# Supplementary material for: Single-cell analysis reveals the COL11A1+ fibroblasts are cancer-specific fibroblasts that promote tumor progression
Source: Front Pharmacol. 2023 Jan 20;14:1121586. doi: 10.3389/fphar.2023.1121586 (PMC9894880; doi:10.3389/fphar.2023.1121586)
Supplement: Supplementary file 9 [file Table8.XLSX]

## Sheet: Table S8
Supplementary Table S8. Signature gene matrix based on single-cell RNA sequencing dataset of multi-cancer
Gene Symbol	Pericytes	Endothelial_cells	CD4+T_cells	Monocytes	Macrophages	CD8+T_cells	B_Plasma_cells	B_cells	Epithelial_cells	Mast_cells	RGS5_FB	CXCL14_FB	DPT_FB	COL11A1_FB	BAMBI_FB	CLDN1_FB
A1BG	80.3715	1	1	47.6369	53.9165	1	91.9633	1	1	79.9857	72.1959	65.3238	1	81.5788	89.8798	69.7066
A2M	796.149	1628.47	1	55.1212	245.085	1	1	1	1	1	501.473	824.796	511.846	250.98	188.653	1
A4GALT	1	52.421	1	1	1	1	1	1	1	1	1	1	44.0399	31.6977	1	1
AAK1	79.0619	80.5551	222.569	74.605	79.1289	210.549	1	1	82.6386	88.5223	65.9896	62.9599	41.7927	77.2248	87.9409	45.6139
AASDHPPT	1	1	1	1	1	1	1	1	1	1	34.2031	1	35.8907	26.0542	1	1
AASS	1	1	1	1	1	1	1	1	1	1	1	1	48.7332	1	1	1
AATF	35.4704	1	1	44.4313	40.5789	79.8191	1	1	36.985	1	1	1	34.293	29.3348	1	26.5603
ABCA1	1	1	1	65.1012	168.204	1	1	1	1	124.422	76.2627	52.8323	45.0433	67.1673	1	44.8751
ABCA10	1	1	1	1	1	1	1	1	1	1	1	1	69.6374	1	1	1
ABCA5	1	1	1	1	1	1	1	1	37.0928	1	1	1	1	1	1	1
ABCA6	1	1	1	1	1	1	1	1	1	1	60.524	60.3677	119.636	1	1	1
ABCA8	1	1	1	1	1	1	1	1	1	1	67.6979	168.943	272.917	1	1	51.5272
ABCA9	1	1	1	1	1	1	1	1	1	1	1	1	72.8417	1	1	1
ABCC3	1	1	1	1	42.7487	1	1	1	91.3498	1	1	1	1	1	1	1
ABCC4	1	1	1	1	1	1	1	1	107.569	150.056	1	61.7054	1	1	1	1
ABCC5	1	1	1	1	1	1	1	1	1	1	1	1	1	28.8985	1	1
ABCC9	134.23	1	1	1	1	1	1	1	1	1	53.1133	1	41.5531	1	1	1
ABCD4	1	76.7965	1	1	1	1	1	1	1	1	40.1913	1	44.2294	1	1	29.4129
ABCG1	1	67.1939	1	1	81.5646	1	1	1	1	1	1	1	1	1	1	1
ABCG2	1	67.1739	1	1	1	1	1	1	1	1	1	1	1	1	1	1
ABHD11	1	1	1	1	1	1	1	1	83.5107	1	1	1	1	1	1	1
ABHD12	1	1	1	38.3669	91.6032	1	1	1	52.8709	1	1	1	1	1	1	1
ABHD13	1	1	1	1	1	1	1	1	1	1	1	1	32.9816	1	1	1
ABHD14A	1	1	1	1	1	1	44.2163	1	1	1	1	1	49.1454	25.274	1	35.473
ABHD14B	52.7246	51.7746	83.8715	1	35.1802	99.4811	1	126.5	64.9814	54.9841	47.2378	60.716	63.2309	38.6899	1	39.7208
ABHD17A	43.9662	108.862	64.6495	46.7454	42.3294	144.508	1	1	30.452	1	39.4199	1	36.1354	31.8099	1	30.4375
ABHD17C	1	1	1	1	1	1	1	1	32.9307	1	1	1	1	1	1	1
ABHD2	1	1	1	107.771	115.271	1	1	1	203.131	83.6848	36.7225	1	1	69.0431	1	42.6528
ABHD3	1	1	1	1	1	1	32.4071	1	38.196	1	1	1	1	1	1	1
ABHD5	1	1	1	106.109	80.2288	1	1	1	1	1	66.3787	1	1	1	1	35.2485
ABI1	43.7261	52.2338	74.2554	67.8832	101.932	109.573	1	93.1407	64.1076	1	1	1	41.775	34.9837	1	43.8104
ABI3	1	98.9084	1	119.194	66.943	139.82	1	1	1	1	1	1	1	1	1	1
ABI3BP	1	1	1	1	1	1	1	1	1	1	38.6862	1	193.759	42.4302	1	58.8297
ABL1	1	1	1	1	1	1	1	1	1	1	46.2193	1	1	40.6969	1	26.0595
ABL2	1	172.662	1	1	55.4773	1	1	1	35.9269	1	76.6517	1	60.851	68.8931	1	211.403
ABLIM1	1	86.4357	1	1	1	1	1	1	47.7176	1	1	1	59.1741	1	59.764	1
ABR	1	1	1	42.4339	63.9857	1	1	1	1	1	1	1	1	1	1	1
ABT1	1	1	1	1	1	79.2844	1	1	28.3145	1	1	1	35.0699	27.3448	1	1
ABTB1	76.8944	1	1	138.524	101.503	1	1	1	1	1	1	1	38.0994	1	1	1
AC004791.2	1	1	1	1	1	1	1	1	1	138.493	1	1	1	1	1	1
AC006129.2	1	1	82.7737	1	1	93.5296	55.0892	1	1	1	1	1	1	1	1	1
AC011526.1	1	165.548	1	1	1	1	1	1	1	1	1	1	1	1	1	1
AC013461.1	180.354	1	1	1	1	1	1	1	1	1	1	91.4912	82.6265	47.2327	114.888	40.5751
AC020571.3	1	1	1	1	1	1	1	1	1	90.1045	1	1	1	1	1	1
AC079767.4	1	1	1	1	1	1	1	111.161	1	1	1	1	1	1	1	1
AC092580.4	1	1	140.149	1	1	401.207	1	1	1	1	1	1	1	1	1	1
AC093673.5	1	1	1	1	1	1	1	1	1	1	1	1	1	1	1	25.4046
AC093818.1	1	1	1	1	1	1	62.271	1	1	1	1	1	1	1	1	1
ACACA	1	1	1	1	1	1	1	1	44.4283	1	1	1	1	1	1	1
ACACB	1	49.7221	1	1	1	1	1	1	1	1	1	1	1	1	1	1
ACADM	41.595	1	1	41.8127	1	1	41.6969	77.0021	37.324	70.1388	36.719	45.8095	45.704	41.575	1	34.796
ACAP1	1	1	400.413	97.6475	1	444.376	68.6748	284.447	1	68.159	1	1	1	1	1	1
ACAT2	1	1	1	1	1	1	1	1	46.1434	1	1	1	1	1	1	1
ACBD3	34.3147	40.5251	1	1	41.2631	1	42.9729	1	73.6886	46.9308	52.3312	46.6395	1	55.4539	1	37.5961
ACBD6	47.6737	1	1	1	1	1	1	1	47.1671	1	46.3616	65.2784	34.9295	43.0914	104.519	42.3542
ACE	1	71.4068	1	1	1	1	1	1	1	1	1	1	1	1	1	1
ACER3	1	1	1	53.0103	62.7264	1	1	1	1	88.2153	1	1	1	1	1	1
ACKR1	1	563.382	1	1	1	1	1	1	1	1	1	1	1	1	1	1
ACO2	50.9525	45.5964	1	46.4226	39.1256	1	47.5325	1	54.6841	1	38.572	1	36.9103	26.9797	1	27.9754
ACOT7	1	1	1	1	1	1	1	1	1	155.934	1	1	1	1	1	1
ACP2	1	1	1	1	83.5428	1	1	1	1	1	1	1	1	26.3576	1	1
ACP5	1	1	1	114.81	567.753	154.481	1	133.904	1	116.144	1	57.2671	82.4409	1	1	1
ACPP	1	1	1	1	1	1	1	1	247.78	1	1	1	1	1	1	1
ACSL1	1	1	1	303.002	258.207	1	1	1	46.1044	1	1	1	1	26.503	1	1
ACSL4	1	1	1	83.4988	74.8263	1	1	1	1	397.455	25.5927	60.2398	1	24.819	1	38.966
ACTA2	4733.19	126.85	1	1	1	1	1	1	1	1	1025.17	603.088	260.88	1375.21	588.632	689.897
ACTG2	285.3	1	1	1	1	1	1	1	1	1	1	1	1	1	1	1
ACTL6A	41.7929	1	1	1	1	1	1	1	44.8756	1	53.1205	44.2182	43.4906	26.769	70.3292	1
ACVR1	1	1	1	1	1	1	1	1	1	1	25.6264	1	1	32.9253	1	1
ACVRL1	1	139.651	1	1	1	1	1	1	1	1	27.684	85.1324	1	1	1	1
ACYP1	44.5838	1	1	1	1	1	1	1	1	1	1	1	1	1	1	1
ACYP2	47.2541	1	1	1	1	1	1	1	31.5655	1	40.9635	1	1	1	1	30.3401
ADAM12	1	1	1	1	1	1	1	1	1	60.0042	1	1	96.7484	307.479	178.449	80.216
ADAM15	1	344.408	1	1	1	1	1	1	66.4135	1	1	1	1	1	1	38.1212
ADAM19	1	1	1	57.203	1	1	1	1	1	1	1	1	1	1	1	1
ADAM28	1	1	1	63.4493	44.318	1	37.511	270.582	1	1	1	109.669	1	1	1	1
ADAM33	1	1	1	1	1	1	1	1	1	1	1	1	57.4488	1	1	1
ADAM8	1	1	1	118.588	141.386	94.0151	1	1	1	1	1	1	1	1	1	1
ADAMDEC1	1	1	1	1	1	1	1	1	1	1	1	1404.88	1	1	1	1
ADAMTS1	400.164	400.143	1	1	1	1	1	1	1	1	275.21	198.408	209.309	1	137	154.769
ADAMTS12	1	1	1	1	1	1	1	1	1	1	51.1656	1	1	96.7393	1	1
ADAMTS14	1	1	1	1	1	1	1	1	1	1	1	1	1	28.3804	1	1
ADAMTS16	1	1	1	1	1	1	1	1	1	1	1	1	1	1	1	35.1287
ADAMTS2	1	1	1	1	1	1	1	1	1	1	75.9782	1	57.7959	179.464	1	48.4754
ADAMTS4	310.933	144.139	1	1	1	1	1	1	1	1	191.194	60.9973	1	28.6362	1	1
ADAMTS5	1	1	1	1	1	1	1	1	1	1	1	1	57.2261	1	1	1
ADAMTS6	1	143.049	1	1	1	1	1	1	1	1	1	1	1	1	1	1
ADAMTS9	101.91	188.894	1	1	1	1	1	1	1	1	1	84.8406	1	1	1	74.6428
ADAMTS9.AS2	1	1	1	1	1	1	1	1	1	1	1	1	51.5683	1	1	1
ADAMTSL2	1	1	1	1	1	1	1	1	1	1	40.9999	1	1	1	1	1
ADAMTSL4	1	1	1	1	41.4053	1	1	1	1	1	1	1	1	1	1	1
ADAP2	87.4637	1	1	72.4416	125.194	1	1	1	1	1	1	1	1	1	1	1
ADARB1	1	49.3409	1	1	1	1	1	1	1	1	1	1	1	1	1	1
ADCY3	102.222	1	1	1	1	1	1	1	1	1	54.4794	1	48.1759	1	1	1
ADCY4	1	168.704	1	1	1	1	1	1	1	1	1	1	1	1	1	1
ADCY7	1	1	1	49.5557	46.0755	1	1	1	1	1	1	1	1	1	1	1
ADCYAP1	1	1	1	1	1	1	1	1	1	208.126	1	1	1	1	1	1
ADD2	1	1	1	1	1	1	1	1	1	1	1	1	1	1	1	24.9105
ADGRA2	78.3195	1	1	1	1	1	1	1	1	1	1	33.4031	108.058	41.6416	1	1
ADGRE5	1	1	98.8094	53.2716	1	299.743	1	1	1	1	1	1	1	1	1	1
ADGRF5	92.6226	163.923	1	1	1	1	1	1	1	1	1	1	1	1	1	1
ADGRG1	1	73.62	1	1	1	1	1	1	1	1	1	1	1	1	1	1
ADGRL3	1	1	1	1	1	1	1	1	1	1	1	105.889	1	1	1	1
ADGRL4	1	316.602	1	1	1	1	1	1	1	1	1	1	1	1	1	1
ADH1B	1	1	1	1	1	1	1	1	1	1	96.8821	254.725	777.262	1	1	89.219
ADIPOR2	1	54.0405	1	1	1	1	1	1	32.8186	1	1	1	1	1	1	1
ADIRF	2909.5	737.501	1	1	1	1	1	1	458.666	1	496.667	197.699	444.117	55.0942	279.325	303.179
ADK	1	1	1	1	1	1	1	71.9743	38.9435	1	1	1	1	1	1	1
ADORA3	1	1	1	1	68.5034	1	1	1	1	1	1	1	1	1	1	1
ADPGK	1	1	1	108.185	117.894	1	1	82.9114	39.3745	52.6885	1	1	1	38.1259	1	26.724
ADPRHL2	1	1	1	1	1	1	1	1	1	1	1	1	1	27.266	1	1
ADRB2	1	1	1	1	1	1	1	1	1	204.279	1	1	1	1	1	1
ADRBK1	1	1	1	132.784	97.8008	91.4431	1	1	35.7894	85.0598	1	1	1	1	1	1
ADRBK2	1	1	1	47.8183	52.99	1	1	1	1	1	1	1	1	1	1	1
ADSL	1	1	71.3828	1	1	1	1	1	30.8223	1	34.4645	1	27.7208	33.0504	1	35.7923
ADSS	50.9711	51.0407	1	55.2944	44.3411	93.4954	1	1	65.9779	1	54.6508	1	1	34.8548	1	44.1695
AEBP1	352.4	66.3487	1	1	1	1	1	1	1	1	579.693	484.806	955.637	2038.44	1135.96	619.409
AFAP1	1	39.1928	1	1	1	1	1	1	1	1	1	1	1	48.6599	1	42.6902
AFAP1L1	1	87.3366	1	1	1	1	1	1	1	1	1	1	1	1	1	1
AFAP1L2	45.814	1	1	1	1	1	1	1	1	1	1	1	1	1	1	1
AFF1	1	52.2094	1	1	42.3383	1	1	1	1	55.99	1	1	49.7878	1	1	26.8794
AFF3	1	1	1	1	1	1	1	95.9408	1	1	1	1	1	1	1	1
AFG3L2	38.5894	1	1	1	1	1	1	1	34.2217	1	1	1	1	35.8438	1	41.5895
AFTPH	1	1	1	62.1968	45.6868	1	1	82.6649	40.7728	1	1	1	1	1	1	1
AGA	1	1	1	1	1	1	49.8353	1	1	1	1	1	1	1	1	1
AGAP2.AS1	1	1	1	1	1	1	1	1	1	1	1	1	1	38.2019	1	1
AGFG1	1	1	1	50.2259	68.6206	1	1	1	44.515	1	1	1	1	1	1	1
AGO2	1	1	1	1	1	1	1	1	43.1306	1	1	1	1	32.8566	1	42.7085
AGO4	1	1	1	64.7831	1	1	1	1	1	1	1	1	1	1	1	1
AGPS	1	1	1	1	1	1	1	1	1	46.3196	1	1	1	1	1	1
AGR2	1	1	1	1	1	1	1	1	790.841	104.344	1	1	1	1	1	1
AGR3	1	1	1	1	1	1	1	1	99.1803	1	1	1	1	1	1	1
AGT	128.625	1	1	1	1	1	1	1	1	1	291.109	288.015	1	1	1	1
AGTPBP1	1	1	1	69.7964	1	1	1	1	1	1	1	1	1	1	1	1
AGTRAP	1	60.9688	1	114.76	80.1668	1	1	1	69.7739	98.8585	42.7483	44.8001	71.0288	76.2527	1	55.5631
AHCY	51.1599	1	1	1	36.4478	1	1	1	84.0787	1	45.8242	1	36.8573	36.137	72.6201	55.3495
AHDC1	1	1	1	1	1	1	1	1	1	1	1	1	1	32.4311	1	29.0027
AHI1	63.137	100.203	1	1	1	1	1	1	54.3513	109.442	112.422	90.6159	46.9195	63.0026	73.9708	60.6345
AHNAK2	1	1	1	1	1	1	1	1	65.8641	1	1	1	65.6154	38.8878	1	1
AHSA2	1	1	1	1	1	1	1	1	30.5637	1	1	1	1	52.8538	1	33.6795
AIDA	59.6399	77.1473	1	1	1	1	1	75.1149	44.507	1	53.4939	43.8602	56.9153	48.1156	58.5625	51.6797
AIF1	1	1	1	1702.73	1609.15	1	1	1	1	1	1	1	1	1	1	1
AIF1L	1	85.3161	1	1	1	1	1	1	1	1	1	1	1	1	1	1
AIM1	1	1	103.329	56.221	1	65.2485	1	1	1	1	1	1	1	1	1	1
AIM2	1	1	1	1	1	1	1	132.599	1	1	1	1	1	1	1	1
AIMP2	1	1	1	1	1	1	1	1	34.7107	1	1	1	1	1	1	1
AK1	139.288	103.179	1	1	1	1	1	1	73.3902	1	50.8102	1	83.1029	66.3245	110.619	163.106
AK4	1	1	1	1	1	1	1	1	32.6381	1	1	1	1	1	1	29.5598
AK6	1	1	1	1	1	1	1	1	33.5545	1	1	1	55.7286	40.0762	72.3778	46.2338
AKAP1	61.1841	1	1	1	1	1	1	1	44.3263	1	1	1	1	1	1	1
AKAP11	1	1	1	1	1	1	1	1	1	1	39.3689	56.6171	1	26.3243	1	1
AKAP17A	1	48.0446	1	42.5703	44.0283	1	45.3678	1	1	1	1	1	1	1	1	27.5692
AKAP8L	1	1	1	1	1	1	1	1	1	1	38.8	1	1	1	1	1
AKIP1	1	1	1	1	1	1	1	1	1	49.5537	1	52.5046	1	49.5623	1	32.8299
AKIRIN2	42.995	1	1	90.7851	76.6609	61.3987	1	70.0304	1	1	43.6291	1	43.8395	44.5904	1	22.7561
AKNA	1	1	134.024	74.9021	51.5266	196.841	1	85.2998	1	1	1	1	1	1	1	1
AKR1C1	1	1	1	1	1	1	1	1	105.992	1	1	1	48.0891	1	1	1
AKR1C2	1	1	1	1	1	1	1	1	270.281	1	1	1	1	1	1	1
AKR1C3	1	78.5742	1	1	1	1	1	1	190.875	1	1	1	49.8906	1	1	1
AKT1S1	41.1395	41.4292	1	1	1	1	1	1	39.2644	1	1	1	30.1611	45.4722	80.703	52.5972
AKT3	54.1311	45.7758	1	1	1	1	1	1	1	1	44.0769	1	1	56.6194	1	28.8781
AL928768.3	1	1	1	1	1	1	130.257	186.453	1	1	1	1	1	1	1	1
ALAD	1	1	1	1	1	1	1	1	1	1	1	1	32.5407	1	1	1
ALAS1	1	1	1	1	34.7179	1	1	1	1	155.977	1	1	1	1	1	1
ALB	1	104.128	1	1	1	1	1	1	1	1	1	1	1	1	1	1
ALCAM	1	1	1	69.4209	104.919	1	1	1	93.5127	1	1	1	1	1	1	37.1635
ALDH18A1	1	1	1	1	1	1	1	1	1	1	1	1	1	51.6525	1	38.1553
ALDH1A1	1	1	1	1	68.1777	1	1	1	1	147.994	123.056	1	245.934	1	120.514	76.4345
ALDH1A2	1	1	1	1	1	1	1	1	1	1	1	1	1	1	1	27.4506
ALDH1A3	1	1	1	1	1	1	1	1	102.223	1	75.6376	139.536	51.0543	50.1775	1	166.965
ALDH1B1	1	1	1	1	1	1	1	1	1	1	1	1	1	53.4606	1	1
ALDH1L2	1	1	1	1	1	1	1	1	1	1	1	1	1	34.8291	1	1
ALDH3A2	1	1	1	1	36.1807	1	1	1	43.6398	1	1	1	42.2899	1	1	1
ALDH6A1	1	1	1	1	1	1	1	1	44.2571	1	1	1	1	1	1	1
ALDH7A1	1	1	1	1	1	1	1	1	37.3464	1	44.7966	1	47.8771	1	1	23.828
ALG13	40.6006	42.1765	1	33.3284	1	1	37.0299	74.8666	47.6456	56.9687	49.3809	1	41.6932	32.8343	1	30.5504
ALG14	1	1	1	1	1	1	31.0385	1	1	1	1	1	1	1	1	1
ALG2	1	1	1	1	1	1	1	1	1	1	1	1	37.0874	35.3929	1	27.5885
ALG3	1	1	1	1	37.6093	1	45.3646	1	56.1335	1	30.8329	1	31.1747	34.9234	67.2261	30.779
ALG5	41.4249	80.3823	1	46.733	35.3948	1	131.178	1	51.883	1	71.1374	90.9396	55.4207	51.9729	82.879	52.4023
ALOX15B	1	1	1	1	1	1	1	1	77.4824	1	1	1	1	1	1	1
ALOX5	1	1	1	165.184	144.864	1	1	81.9024	1	254.973	1	1	1	1	1	1
ALOX5AP	1	1	332.812	879.089	815.667	725.852	1	222.273	1	1152.39	1	1	1	1	1	1
ALPL	1	62.8365	1	1	1	1	1	1	1	1	1	1	54.0649	1	1	1
ALS2	1	1	1	1	1	1	1	1	1	56.0164	1	1	1	1	1	1
AMDHD2	1	1	1	1	55.1076	1	1	1	1	1	1	1	1	26.1215	1	23.2101
AMFR	1	1	1	1	34.0244	1	1	1	1	1	1	1	1	1	1	1
AMICA1	1	1	1	270.049	133.573	1	1	1	1	1	1	1	1	1	1	1
AMOTL2	1	1	1	1	1	1	1	1	1	1	1	1	34.4141	43.7968	1	48.9247
AMPD2	1	1	1	57.2603	1	1	1	1	1	1	1	1	1	1	1	1
AMZ2	1	1	1	1	1	1	30.05	1	38.3552	1	1	1	37.9052	41.8979	1	38.9367
ANAPC10	1	1	1	1	1	1	1	1	1	1	34.2215	1	34.134	1	1	1
ANG	1	1	1	1	1	1	1	1	36.4108	1	1	1	47.6325	26.0592	1	1
ANGPT1	57.5033	1	1	1	1	1	1	1	1	1	1	1	1	1	1	1
ANGPT2	210.425	260.361	1	1	1	1	1	1	1	1	51.9736	1	1	1	1	1
ANGPTL1	1	1	1	1	1	1	1	1	1	1	1	1	79.3315	1	1	26.4085
ANGPTL2	50.3047	1	1	1	1	1	1	1	1	1	110.197	86.9831	161.564	174.937	99.4548	75.835
ANGPTL4	90.8964	1	1	1	1	1	1	1	1	1	52.1852	1	96.0052	111.364	1	171.126
ANK2	1	1	1	1	1	1	1	1	1	1	1	1	79.7419	1	1	1
ANKH	1	1	1	1	1	1	1	1	50.9012	1	56.3196	37.6158	1	108.024	1	32.0441
ANKRA2	1	1	1	1	1	1	1	1	1	1	1	1	38.8973	1	1	1
ANKRD13A	1	1	1	67.615	1	1	1	62.0589	1	1	1	1	1	1	1	1
ANKRD13D	1	1	1	82.7577	73.3136	1	1	1	1	1	1	1	1	1	1	1
ANKRD22	1	1	1	47.8007	1	1	1	1	1	1	1	1	1	1	1	1
ANKRD28	1	115.459	1	1	1	189.341	206.724	1	1	304.393	47.181	95.4926	58.8009	75.5007	1	149.09
ANKRD29	1	63.5201	1	1	1	1	1	1	1	1	1	1	1	1	1	1
ANKRD35	1	1	1	1	1	1	1	1	1	1	38.1168	36.542	55.1997	1	1	1
ANKRD36	1	38.347	1	1	1	1	60.7195	1	1	45.3555	1	1	1	1	1	1
ANKRD36C	1	1	1	1	1	1	56.4813	1	88.668	47.8537	1	1	1	1	1	1
ANKRD37	1	1	1	1	1	1	89.21	1	91.2692	1	81.6477	1	1	1	1	1
ANKRD40	1	51.3382	1	1	1	1	1	1	1	1	1	1	1	1	1	1
ANKRD44	1	1	107.167	76.2756	1	129.161	1	172.426	1	71.8186	1	1	1	1	1	1
ANKS3	1	1	1	1	1	1	1	1	1	1	1	1	1	42.6184	1	1
ANO1	78.5891	1	1	1	1	1	1	1	1	1	71.5467	1	1	1	1	1
ANPEP	1	1	1	135.169	92.6675	1	1	1	1	1	1	1	1	1	1	1
ANTXR1	140.559	1	1	1	1	1	1	1	1	1	172.22	225.251	177.334	468.898	357.758	136.682
ANTXR2	1	1	1	1	1	1	1	1	35.4895	64.3727	73.2608	74.0441	71.2047	61.2767	1	49.7176
ANXA1	235.091	336.95	616.629	558.295	475.184	674.115	1	1	566.567	1774.99	381.548	269.636	535.732	345.098	319.941	743.396
ANXA2R	1	1	80.7104	1	1	62.0672	1	1	1	1	1	1	1	1	1	1
ANXA3	1	1	1	1	1	1	1	1	123.732	1	1	1	1	1	1	1
ANXA4	58.795	47.1376	1	46.8167	85.6261	1	1	1	294.884	185.772	58.9372	83.7717	122.911	99.4294	51.1438	77.3718
AOAH	1	1	1	111.242	74.7131	101.159	1	1	1	1	1	1	1	1	1	1
AOC3	90.5096	1	1	1	1	1	1	1	1	1	1	1	1	1	1	1
AOX1	1	1	1	1	1	1	1	1	1	1	1	1	50.4401	1	1	1
AP1B1	1	1	1	56.6034	88.3356	1	1	1	1	1	1	1	1	1	1	1
AP1G1	1	1	1	1	1	1	1	1	37.4903	1	1	1	1	1	1	1
AP1M2	1	1	1	1	1	1	1	1	59.3407	1	1	1	1	1	1	1
AP1S2	47.3967	154.731	1	338.974	183.973	1	1	99.1801	1	162.291	1	34.2202	1	37.1433	1	1
AP3D1	1	54.5733	1	35.7474	1	1	29.5969	1	58.3516	1	1	43.1231	1	46.37	1	31.4168
AP3M2	1	1	1	1	1	1	1	1	1	1	1	1	1	28.9462	1	1
AP4M1	1	1	1	1	1	1	1	1	1	1	1	1	1	26.6917	1	35.5597
APAF1	1	1	1	58.6648	1	1	1	1	1	1	1	1	1	1	1	1
APBB1IP	1	1	137.864	179.164	114.247	162.57	1	125.71	1	1	1	1	1	1	1	1
APBB2	55.7018	64.4468	1	1	1	1	1	1	1	1	51.9026	1	1	61.2049	1	29.9029
APCDD1	1	1	1	1	1	1	1	1	1	1	1	59.3981	1	71.0485	98.4453	1
APH1B	1	1	1	1	52.8782	1	1	1	1	1	1	1	1	1	1	1
API5	1	1	1	1	1	1	1	1	1	1	1	1	1	35.0011	1	1
APIP	1	1	1	1	42.1058	1	1	1	38.3233	1	1	1	1	1	1	1
APLNR	1	137.011	1	1	1	1	1	1	1	1	1	1	1	1	1	1
APOBEC3A	1	1	1	208.395	1	1	1	1	1	1	1	1	1	1	1	1
APOBEC3C	52.4507	1	103.923	44.233	47.548	206.353	48.9942	73.3152	1	1	1	77.5643	35.5595	36.2686	1	54.0494
APOBEC3G	1	1	132.386	48.5598	1	436.873	45.4946	64.0213	1	1	1	1	1	1	1	1
APOBR	1	1	1	83.4481	67.9117	1	1	1	1	1	1	1	1	1	1	1
APOC1	66.3582	70.4423	1	656.834	5110.21	1	1	1	52.8328	166.628	82.6949	70.193	125.322	40.8516	1	178.456
APOD	1	1	1	1	1	1	1	1	1	1	778.904	744.128	4892.4	338.428	676.995	51.1803
APOE	943.532	100.18	1	744.517	6752.94	1	60.7313	1	48.6443	135.053	2093.94	1110.07	1177.37	355.362	656.669	1644.98
APOL1	1	86.0363	1	1	1	1	1	1	1	1	60.2607	79.9875	78.9095	91.4057	1	60.256
APOL2	1	1	1	1	1	1	1	1	1	1	1	1	36.2992	63.752	1	36.1353
APOL3	1	70.8308	1	1	1	1	1	1	1	1	1	1	34.6208	1	1	1
APOL6	1	1	72.22	73.6503	75.4008	112.844	57.5339	1	36.0754	1	44.8341	65.5605	44.1511	46.5665	1	40.7964
APOLD1	96.464	190.667	1	1	1	1	1	1	1	1	1	1	1	1	1	1
APPBP2	38.4432	1	1	1	1	1	1	1	1	1	39.8567	1	1	28.0747	1	41.477
APPL2	1	1	1	1	1	1	1	1	1	1	1	1	36.026	32.6268	1	21.7402
AQP1	1	939.984	1	1	1	1	1	1	1	1	1	1	1	1	1	96.0006
AQP3	1	1	164.666	1	1	1	55.7799	1	79.2293	1	1	1	1	1	1	1
AQP9	1	1	1	234.204	187.044	1	1	1	1	1	1	1	1	1	1	1
AR	1	1	1	1	1	1	1	1	86.3324	1	1	1	62.5736	1	1	1
ARAP2	1	1	106.734	1	1	122.597	1	1	1	1	1	1	1	1	1	1
ARAP3	1	52.1281	1	1	1	1	1	1	1	1	1	1	1	1	1	1
AREG	1	1	1	438.925	170.88	310.3	1	204.145	120.565	1023.41	1	1	1	1	1	1
ARFGAP1	1	1	1	1	1	1	1	1	1	1	1	1	1	40.5514	1	34.3538
ARFGAP2	1	1	56.5162	50.2066	1	1	1	1	40.7537	54.6487	58.1904	1	1	32.3977	1	1
ARFGAP3	64.3677	43.8191	1	66.676	41.9205	1	73.873	1	71.2408	1	44.46	62.1639	30.5818	47.3849	75.8328	39.688
ARFGEF1	1	1	1	41.4243	1	1	1	1	37.7447	1	1	1	1	1	1	1
ARFGEF3	1	1	1	1	1	1	1	1	59.4113	1	1	1	1	1	1	1
ARFIP1	1	1	1	1	1	1	1	1	1	1	47.9495	1	1	1	1	24.9664
ARG2	1	1	1	1	1	1	1	1	63.9769	1	1	1	1	1	1	1
ARHGAP1	99.6726	1	1	1	1	1	1	1	1	1	60.7026	1	56.2451	87.8167	1	47.2701
ARHGAP10	91.095	1	1	1	1	1	1	1	1	1	55.3767	1	1	1	1	1
ARHGAP12	1	1	1	1	1	1	1	1	31.1826	1	1	1	49.9789	1	1	1
ARHGAP15	101.381	1	189.706	55.8103	50.6182	159.664	1	124.59	1	88.2258	38.1154	1	1	1	1	1
ARHGAP17	58.5452	41.8401	1	1	1	1	1	1	1	1	1	1	1	1	1	1
ARHGAP18	1	81.8112	1	112.08	229.811	1	1	1	1	352.818	43.8023	71.9182	1	48.9572	1	58.5335
ARHGAP21	1	1	1	1	1	1	1	1	39.6836	1	59.2411	1	76.7838	51.0925	1	38.7724
ARHGAP23	1	55.6036	1	1	1	1	1	1	1	1	1	1	1	1	1	1
ARHGAP24	1	1	1	1	1	1	1	273.365	1	1	1	1	33.4896	24.8517	1	1
ARHGAP25	1	1	79.4424	60.0061	59.2434	82.7033	1	69.3724	1	79.0653	1	1	1	1	1	1
ARHGAP26	1	1	1	93.1618	59.822	1	1	1	1	1	1	1	1	1	1	1
ARHGAP27	1	1	1	47.9153	1	1	1	1	1	1	1	1	1	1	1	1
ARHGAP28	1	1	1	1	1	1	1	1	1	1	1	1	1	1	1	20.8843
ARHGAP29	165.326	366.267	1	1	1	1	1	1	70.2033	1	52.4141	1	39.9465	1	95.4119	68.871
ARHGAP30	1	1	159.844	151.299	98.3918	165.047	1	111.038	1	1	1	1	1	1	1	1
ARHGAP31	1	66.6545	1	1	1	1	1	1	1	1	1	1	1	1	1	1
ARHGAP32	1	1	1	1	1	1	1	1	42.4913	1	1	1	1	1	1	1
ARHGAP4	1	1	88.895	61.8965	67.6267	96.3373	1	78.3789	1	1	1	1	1	1	1	1
ARHGAP6	53.4319	1	1	1	1	1	1	1	1	1	1	64.4666	1	1	1	1
ARHGAP9	1	1	96.4045	105.167	74.4556	179.776	1	69.2332	1	1	1	1	1	1	1	1
ARHGDIB	365.361	345.897	1053.79	776.373	556.382	1210.77	159.793	851.084	50.6382	860.998	126.712	1	35.5015	1	1	26.0432
ARHGEF1	1	56.3306	229.937	81.7057	58.3366	259.1	1	120.876	1	1	1	1	1	28.2246	1	1
ARHGEF15	1	75.6725	1	1	1	1	1	1	1	1	1	1	1	1	1	1
ARHGEF17	130.463	1	1	1	1	1	1	1	1	1	62.498	39.5839	1	34.6659	1	1
ARHGEF25	40.8739	1	1	1	1	1	1	1	1	1	1	1	1	27.6796	1	1
ARHGEF26	1	1	1	1	1	1	1	1	76.3655	1	1	1	1	1	1	1
ARHGEF3	1	42.4557	1	1	1	83.2849	1	1	1	1	1	1	1	1	1	1
ARHGEF40	1	1	1	80.7987	1	1	1	1	1	49.1264	32.6177	1	39.9863	39.1647	1	26.9525
ARHGEF6	1	1	1	39.0985	1	1	1	1	1	246.289	1	1	1	1	1	1
ARHGEF7	73.7272	57.1653	1	1	1	1	1	1	1	1	1	1	1	25.3305	1	1
ARID1A	50.5012	68.5408	1	88.3232	59.3707	1	1	70.8627	53.8179	74.4546	48.7562	54.0693	1	41.7211	1	38.0409
ARID3A	1	1	1	69.6814	1	1	1	1	1	1	1	1	1	1	1	1
ARID5A	130.052	96.1234	123.982	70.7602	61.8055	125.271	1	1	1	1	86.2533	1	1	37.9117	1	1
ARIH1	66.6797	62.5596	1	1	1	1	1	1	41.9205	1	56.1808	1	1	28.8021	1	31.1209
ARL13B	1	1	1	1	1	1	1	1	1	1	47.5719	48.6108	1	1	1	31.0849
ARL14EP	1	1	1	1	1	1	37.0339	57.7881	1	1	45.9209	1	41.3394	44.5685	1	41.8489
ARL15	1	121.087	1	1	1	1	1	1	1	1	1	1	1	1	1	1
ARL4A	41.4725	241.126	1	73.2657	64.5978	1	1	79.7579	74.7216	85.3775	50.7719	1	1	1	1	45.12
ARL4C	1	1	224.037	83.9844	182.151	281.217	1	1	42.3285	1	86.9754	1	1	118.7	1	44.6951
ARL4D	1	1	1	1	1	1	1	1	1	1	1	1	45.6651	1	1	98.0061
ARL5B	1	68.094	1	1	1	1	1	1	48.561	1	35.9217	1	1	1	1	1
ARL6IP6	1	1	1	1	1	78.8998	1	1	39.3276	1	1	1	1	30.778	1	27.2507
ARMC8	1	1	1	1	1	1	1	1	1	1	1	1	1	1	1	28.856
ARMC9	1	1	1	1	1	1	1	1	1	1	1	1	1	53.611	1	39.4694
ARMCX1	48.748	1	1	1	1	1	1	1	1	1	41.7505	57.6204	59.7158	42.3141	76.2065	41.3854
ARMCX2	1	1	1	1	1	1	1	1	1	1	46.7796	1	44.337	38.6682	47.4572	39.1101
ARMCX6	39.6594	39.7189	1	1	36.3827	1	1	1	33.8931	49.4243	26.686	1	44.1473	37.5249	1	27.8999
ARNT	1	1	1	1	1	1	1	1	1	1	1	40.8814	47.8078	36.2013	1	1
ARRB2	1	1	125.47	293.436	251.21	129.732	1	1	1	93.5438	1	1	1	1	1	1
ARRDC2	1	42.532	1	1	1	1	1	1	1	1	1	1	1	1	1	1
ARRDC4	1	1	1	1	45.9703	1	1	1	1	1	1	1	1	1	1	1
ARSA	1	1	1	1	42.825	1	102.148	1	1	1	1	1	1	27.388	1	32.8182
ARSD	1	1	1	1	1	1	1	1	44.0962	1	1	1	1	1	1	23.8968
ARSI	1	1	1	1	1	1	1	1	1	1	1	1	1	1	1	27.701
ASAP2	1	61.438	1	1	1	1	1	1	1	1	1	1	1	1	1	1
ASAP3	1	1	1	1	1	1	1	1	1	1	1	1	38.2601	1	1	1
ASB8	1	1	1	1	1	1	1	1	1	1	1	1	38.9475	28.1342	1	1
ASCC3	1	1	1	1	1	1	31.7901	1	1	1	31.2084	1	1	37.5871	1	21.8322
ASGR1	1	1	1	80.8957	1	1	1	1	1	1	1	1	1	1	1	1
ASL	1	1	1	1	1	1	1	1	50.6935	1	1	1	1	1	1	1
ASMTL	1	1	1	1	1	1	1	1	1	1	1	1	1	35.4833	1	26.8504
ASPHD1	1	1	1	1	1	1	1	1	1	1	1	1	1	1	1	44.2095
ASPN	285.345	1	1	1	1	1	1	1	1	1	444.801	161.394	251.353	636.002	367.791	83.9247
ASPSCR1	1	1	1	1	1	1	1	1	38.2593	1	1	1	1	44.096	1	26.6235
ASRGL1	1	65.8333	1	1	1	1	1	1	45.6273	100.62	1	1	1	1	1	1
ASS1	1	90.8387	1	1	1	1	1	1	111.111	1	1	1	45.789	28.9829	1	63.3569
ASXL1	1	46.5917	1	1	1	1	1	1	1	1	29.0066	1	50.7017	1	1	1
ATF1	1	1	1	1	1	1	1	1	1	1	1	1	35.6332	1	1	31.3729
ATF2	1	1	1	1	1	1	1	1	1	1	1	1	45.5043	34.3401	1	1
ATF5	1	1	1	94.3947	108.936	1	54.1984	1	1	1	1	1	1	1	1	1
ATF6	1	70.269	1	53.5504	51.1604	1	33.7208	1	49.5482	1	1	39.8169	31.0748	35.973	1	35.3426
ATF7IP	1	39.9624	77.8085	50.8996	1	115.565	1	80.6671	32.8938	1	1	1	40.2819	42.6425	1	29.9439
ATF7IP2	1	1	1	1	1	1	1	76.8204	1	1	1	1	1	1	1	1
ATG101	1	1	1	1	1	1	1	1	45.6131	1	1	49.9259	53.26	53.3462	64.9226	39.2553
ATG16L2	1	1	1	108.005	99.2735	1	1	1	1	1	1	1	1	1	1	1
ATG7	1	1	1	1	43.1974	1	1	1	1	1	1	1	1	26.089	1	1
ATM	1	45.7071	161.663	82.9749	51.9532	142.764	71.4635	143.813	1	1	55.4067	63.1684	41.9858	55.1836	1	52.75
ATP10A	1	1	1	1	1	1	1	1	1	1	1	1	1	30.0313	1	1
ATP10D	1	1	1	1	1	1	1	1	1	1	1	1	1	35.9948	1	1
ATP11A	1	53.9026	1	1	1	1	1	1	1	1	1	1	1	1	1	1
ATP11C	1	57.0496	1	1	1	1	1	1	1	1	1	1	1	1	1	1
ATP1B1	1	1	1	1	60.4079	1	1	1	278.097	119.892	85.014	75.9699	72.3177	48.5053	84.6069	99.8609
ATP1B2	52.5592	1	1	1	1	1	1	1	1	1	1	1	1	1	1	1
ATP2A3	1	1	1	1	1	1	31.498	72.6167	1	58.2606	1	1	1	1	1	1
ATP2B4	108.623	90.5902	71.5682	1	1	96.1947	1	1	1	1	41.675	54.7499	82.1436	38.8665	1	76.8416
ATP5EP2	1	1	1	1	44.6381	1	1	1	1	1	1	45.4589	1	1	1	1
ATP5F1E	1	1	1	1	1	1	1	1	1	1	67.3427	1	1	1	1	1
ATP6V0A1	1	1	1	1	58.7234	1	1	1	47.596	1	1	1	1	26.0108	1	1
ATP6V0A2	1	1	1	1	1	1	1	1	1	137.715	1	1	1	1	1	1
ATP6V0C	1	1	1	1	1	1	1	1	1	1	1	1	91.6991	70.3825	1	1
ATP6V0E2	1	1	72.9335	1	1	66.7919	1	1	48.6628	1	1	1	1	1	1	1
ATP6V1B2	1	1	1	232.413	281.085	1	1	1	1	1	43.9413	1	49.9318	46.8666	1	1
ATP8B1	1	60.0023	1	1	1	1	1	1	36.0243	1	1	1	1	1	1	1
ATPAF1	33.3565	1	1	1	1	1	1	1	33.7647	1	1	1	35.7241	1	1	1
ATXN1	45.05	1	1	58.5214	64.0451	71.0202	1	1	1	98.915	34.7717	1	42.8768	87.4674	1	52.3172
ATXN7	1	1	73.5007	1	1	94.4919	1	1	1	1	1	1	1	1	1	39.8743
ATXN7L3B	1	1	1	1	1	1	1	1	54.8109	1	31.146	1	57.2316	37.2825	91.2649	29.6373
AVPI1	1	1	1	1	60.9398	1	1	1	1	1	1	1	99.9057	1	1	36.7208
AXIN2	1	1	1	1	1	1	1	1	1	1	1	1	1	1	1	33.9643
AZGP1	1	1	1	1	1	1	1	1	401.2	1	1	1	1	1	1	1
B3GALNT2	1	1	1	1	1	1	1	1	1	1	1	39.4956	1	1	1	1
B3GNT2	102.986	1	1	1	47.0125	1	1	1	1	1	49.404	1	1	1	1	1
B3GNT5	1	1	1	72.6261	50.8444	1	1	1	35.9778	1	1	1	1	1	1	1
B3GNT9	1	1	1	1	1	1	1	1	1	1	1	1	1	34.4006	1	27.1151
B4GALT3	1	1	1	1	1	1	58.4972	1	40.0023	1	1	1	1	32.5321	56.6061	23.6123
B4GALT4	1	1	1	1	1	1	1	1	43.4038	1	1	1	1	29.322	1	36.6885
B4GALT5	1	49.9563	1	72.6582	49.2442	1	1	1	47.9437	87.9253	1	1	1	32.7976	1	33.4481
B4GALT7	1	1	1	1	1	1	42.365	1	1	1	1	1	1	38.1228	1	43.75
BACE2	1	71.4256	1	1	1	1	1	1	66.071	220.764	37.8366	1	36.9485	54.1894	1	45.1083
BACH1	1	1	1	129.751	116.854	1	34.5643	1	1	62.2132	1	1	1	30.7601	1	32.304
BAG3	96.2817	138.271	1	1	1	1	1	1	83.7961	1	154.196	78.2912	53.9687	36.2471	1	83.2829
BAIAP2	1	45.8065	1	1	1	1	1	1	83.7502	1	1	1	1	1	1	39.8784
BAIAP2L1	1	1	1	1	1	1	1	1	72.1285	1	1	1	1	1	1	1
BAMBI	1	1	1	1	1	1	1	1	53.9197	1	1	133.464	1	1	353.574	1
BANK1	1	1	1	1	1	1	1	490.631	1	1	1	1	1	1	1	1
BASP1	1	1	1	420.803	344.783	1	54.8461	176.129	80.7406	76.6982	111.503	104.003	100.454	178.079	92.5659	98.2044
BATF	1	1	298.051	1	1	158.535	1	1	1	117.914	1	1	1	1	1	1
BAZ1A	71.6865	98.9978	164.757	190.375	113.537	121.838	1	109.704	54.9211	57.4672	80.9465	57.3009	1	36.9903	1	50.8956
BCAM	286.818	411.146	1	1	1	1	1	1	261.615	1	69.9024	1	1	1	1	63.5764
BCAS4	1	1	1	1	1	1	1	143.909	1	1	1	1	1	1	1	1
BCAT1	1	1	1	80.5852	99.8004	1	1	1	1	1	1	1	1	69.4551	1	77.684
BCCIP	1	1	1	1	1	1	1	1	53.3842	1	1	1	56.7588	37.7897	1	1
BCHE	1	1	1	1	1	1	1	1	1	1	1	1	1	1	1	48.5682
BCL11A	1	1	1	1	1	1	1	140	1	1	1	1	1	1	1	1
BCL11B	1	1	138.726	1	1	92.4336	1	1	1	1	1	1	1	1	1	1
BCL2	1	1	101.894	1	1	67.7981	1	84.2823	1	1	1	1	1	1	1	1
BCL2A1	1	1	1	664.443	463.277	1	1	118.549	1	1	1	1	1	1	1	1
BCL2L1	61.7584	45.059	1	1	56.6569	1	38.1799	1	74.7067	1	1	1	1	35.0357	1	22.5253
BCL2L11	1	1	1	1	1	1	75.6353	1	1	1	1	1	1	1	1	1
BCL2L13	1	1	1	1	1	1	1	1	28.2477	1	1	1	1	1	1	35.6933
BCL6	62.8495	1	1	152.311	106.285	1	1	1	1	1	1	1	1	1	1	1
BCL6B	1	74.776	1	1	1	1	1	1	1	1	1	1	1	1	1	1
BCL7B	60.3077	57.7418	1	1	34.0599	71.2922	1	1	41.4413	1	33.7478	1	1	36.7531	1	32.3059
BCL9L	1	1	1	1	1	1	1	1	1	1	32.8663	1	1	30.5393	1	1
BCR	1	61.4448	1	1	1	1	1	1	1	1	1	1	1	1	1	1
BDKRB1	1	1	1	1	1	1	1	1	1	1	1	1	1	1	1	77.5602
BEST1	1	1	1	63.0419	52.2952	1	1	1	1	1	1	1	1	1	1	1
BET1	1	41.5777	1	1	1	1	42.3586	1	50.8512	1	38.4214	50.0124	45.353	40.9989	72.7892	48.5101
BET1L	1	1	1	1	1	1	36.079	1	1	1	1	1	37.3445	43.3161	1	31.7135
BEX1	1	1	1	1	1	1	1	1	1	1	1	1	1	1	90.1404	1
BEX2	1	1	1	1	1	1	1	1	35.7839	1	1	1	1	1	47.2463	1
BEX4	57.9662	70.7856	1	49.8248	72.0072	1	1	1	71.192	250.718	116.175	77.5755	90.545	58.421	134.402	88.4996
BGN	1664.2	218.06	1	1	1	1	1	1	1	1	1805.54	617.453	790.21	2117.49	1183.47	1151.78
BHLHE40	119.384	199.347	1	108.807	108.412	96.5414	1	1	67.4983	261.457	128.258	110.694	65.6956	104.765	1	94.662
BHLHE41	1	1	1	1	75.6318	1	53.56	1	1	1	50.6646	1	1	54.3504	1	1
BICC1	1	1	1	1	1	1	1	1	1	1	92.6408	123.377	102.938	90.7289	122.353	77.0678
BICD2	1	1	1	56.0986	1	1	1	1	1	1	1	1	1	1	1	1
BID	1	41.0683	1	163.445	118.221	1	29.1572	1	49.8768	1	1	1	1	1	1	33.0681
BIK	1	1	1	1	1	1	1	1	64.7409	1	1	1	1	1	1	1
BIN1	1	1	122.386	1	1	153.183	1	115.958	34.881	1	1	1	80.0207	1	1	39.5581
BIN2	1	1	150.556	124.423	75.5992	227.949	1	80.4296	1	49.5835	1	1	1	1	1	1
BIRC3	1	1	385.688	106.15	1	203.175	145.778	352.515	97.7624	378.729	1	1	1	1	1	47.8368
BIVM	1	1	1	1	1	1	1	1	1	1	1	1	1	1	1	27.9375
BLK	1	1	1	1	1	1	1	203.528	1	1	1	1	1	1	1	1
BLMH	1	1	1	1	1	1	1	1	1	1	1	1	1	1	1	33.0518
BLNK	1	1	1	1	1	1	46.1754	142.344	1	1	1	1	1	1	1	1
BLOC1S4	1	1	1	1	1	1	1	1	27.3184	1	42.4702	1	1	32.9744	1	1
BLVRA	45.8462	1	1	89.7711	105.073	1	1	1	54.6637	124.448	49.8579	1	28.0629	45.1513	53.5262	57.0529
BMI1	1	1	1	1	1	1	1	1	32.7788	1	1	1	1	1	1	27.9789
BMP1	83.589	1	1	1	1	1	1	1	1	1	50.3966	40.9593	46.2291	108.065	1	65.5752
BMP2	1	1	1	1	1	1	1	1	1	1	1	81.368	1	1	1	1
BMP2K	1	1	1	60.3791	115.821	1	1	1	1	207.874	1	1	1	1	1	1
BMP4	1	1	1	1	1	1	1	1	1	1	1	262.15	55.4064	1	1	39.1704
BMP5	1	1	1	1	1	1	1	1	1	1	1	125.926	1	1	1	1
BMP7	1	1	1	1	1	1	1	1	1	1	1	78.7957	1	1	142.625	1
BMPR1A	1	1	1	1	1	1	1	1	1	1	1	1	41.254	27.098	1	1
BNC2	1	1	1	1	1	1	1	1	1	1	1	41.6827	84.1879	87.9982	65.9284	100.002
BOC	1	1	1	1	1	1	1	1	1	1	1	1	140.36	53.094	1	66.3976
BOD1	1	42.597	1	1	1	1	1	1	45.7417	1	47.966	62.2244	55.5964	52.7087	85.9916	50.9166
BOLA1	1	1	1	1	1	1	1	1	32.9063	1	1	1	1	1	1	1
BORCS7	1	1	1	1	1	1	1	1	45.7537	1	1	85.8745	54.6868	61.1772	75.2915	60.715
BRD9	1	69.7667	1	1	1	1	1	1	37.9977	60.2772	39.605	1	1	33.1153	1	1
BRE	1	1	1	1	1	1	1	1	1	56.922	1	1	1	54.3243	1	39.881
BRSK1	1	1	1	1	1	1	42.7283	1	1	1	1	1	1	1	1	1
BST1	1	1	1	84.1349	55.8016	1	1	1	1	1	1	1	1	1	1	31.9399
BTBD2	1	1	1	1	1	1	1	1	1	1	1	1	1	30.9133	1	1
BTBD3	1	41.0844	1	1	1	1	1	1	1	1	1	1	1	1	1	1
BTK	1	1	1	55.7067	48.6561	1	1	129.967	1	264.392	1	1	1	1	1	1
BTN2A2	1	1	1	1	1	1	1	1	1	51.3815	1	1	1	1	1	1
BTN3A1	1	1	76.2249	1	1	106.525	1	1	1	1	1	1	1	39.366	1	1
BTN3A2	1	78.8806	121.53	1	1	188.178	53.3226	82.6698	1	90.8371	1	45.6749	41.5826	53.0404	1	32.6209
BTNL9	1	137.568	1	1	1	1	1	1	1	1	1	1	1	1	1	1
C10orf10	277.925	346.251	1	1	1	1	1	1	61.6671	1	153.643	1	281.648	95.1857	1	106.213
C10orf128	1	56.6704	1	1	1	1	1	1	1	89.0499	1	1	1	1	1	1
C10orf32	1	1	1	1	1	1	1	1	1	1	40.7848	1	1	1	1	1
C10orf54	53.0255	99.2986	157.804	411.12	227.342	95.4353	98.1934	1	1	84.1056	1	41.0174	78.7005	1	1	58.8015
C11orf1	1	1	1	1	1	1	30.73	1	57.2123	1	1	1	1	1	1	29.2801
C11orf24	1	1	1	1	1	1	47.2033	1	1	1	32.3815	1	37.2611	71.1646	1	39.1175
C11orf54	1	1	1	1	1	1	1	1	45.9624	1	1	1	1	1	1	1
C11orf57	1	1	1	1	1	1	1	1	1	1	1	35.9153	1	33.3459	1	1
C11orf74	1	1	1	1	1	1	1	1	1	1	1	42.143	1	28.5909	1	46.366
C11orf96	1233.11	156.444	1	1	1	1	1	1	1	1	1838.18	761.833	116.125	155.673	1	97.2956
C12orf23	1	1	1	1	1	1	1	1	1	1	47.0016	1	1	1	1	1
C12orf44	1	1	1	1	1	1	1	1	1	1	40.1389	1	1	1	1	1
C12orf45	1	1	1	44.163	37.1524	1	57.2533	1	38.6673	1	1	1	1	1	1	1
C12orf65	1	1	1	1	1	67.9335	1	1	1	1	1	47.0187	1	1	1	1
C12orf75	126.127	1	1	1	1	186.593	1	95.1537	114.008	1	53.0885	66.6692	58.2917	101.183	75.9498	87.2144
C12orf76	1	1	1	1	1	1	1	1	1	1	1	1	49.5377	32.4847	1	30.2962
C14orf132	1	1	1	1	1	1	1	1	1	1	1	1	1	1	1	40.3522
C14orf37	1	1	1	1	1	1	1	1	1	1	1	1	1	29.5315	1	1
C15orf40	1	1	1	1	1	1	1	1	29.5349	1	1	1	38.7119	1	1	26.0093
C15orf48	1	1	1	973.668	678.542	1	1	1	302.944	1	1	1	1	1	1	1
C15orf57	1	1	1	1	1	1	36.4551	1	1	1	29.5926	1	1	1	1	1
C15orf61	1	1	1	1	1	1	1	1	54.413	72.7902	32.1356	1	57.805	39.0786	1	29.8346
C16orf45	47.7072	1	1	1	1	1	1	1	1	1	48.299	1	52.37	32.7084	1	30.7894
C16orf58	1	1	1	1	1	1	1	1	1	1	1	1	1	35.9932	1	1
C16orf62	1	1	1	1	1	1	1	1	1	1	1	1	34.2186	1	1	1
C16orf89	1	1	1	1	1	1	1	1	1	1	1	1	87.714	1	1	1
C17orf62	1	1	111.548	112.224	93.3119	114.519	66.3455	127.568	34.171	1	32.8467	47.2574	40.4943	56.8326	1	42.7978
C18orf32	43.6324	1	1	1	38.277	1	1	1	39.6668	72.7446	38.4473	1	36.3145	36.86	1	1
C19orf10	1	61.3843	1	1	62.816	1	223.321	1	78.4912	1	112.635	1	1	1	1	1
C19orf25	1	1	1	1	1	1	1	63.3485	36.341	1	32.4841	1	1	46.3376	1	41.7944
C19orf33	1	1	1	1	1	1	1	1	535.544	1	1	1	1	1	1	45.0487
C19orf38	1	1	1	74.03	1	1	1	1	1	1	1	1	1	1	1	1
C19orf48	1	1	1	1	1	1	1	1	124.835	1	1	1	1	27.1334	1	43.5784
C19orf66	76.9498	83.0814	123.082	44.832	1	163.729	31.433	91.2514	1	1	37.5629	72.8839	61.1169	99.8582	1	51.2959
C1GALT1	1	1	1	1	1	1	1	1	30.7847	1	1	1	1	1	1	39.6097
C1GALT1C1	1	1	1	1	1	1	42.2355	1	1	1	1	1	1	29.5866	1	1
C1QA	1	1	1	864.407	3252.13	1	1	1	1	1	1	1	1	1	1	1
C1QB	1	1	1	815.699	3460.26	1	1	1	1	1	1	1	1	1	1	1
C1QC	1	1	1	531.05	1873.89	1	1	1	1	1	1	1	1	1	1	1
C1QTNF1	216.435	1	1	1	1	1	1	1	1	1	90.1362	1	1	61.8319	1	60.4028
C1QTNF2	50.5161	1	1	1	1	1	1	1	1	1	1	1	1	1	1	1
C1QTNF3	1	1	1	1	1	1	1	1	1	1	1	1	129.788	149.957	1	1
C1QTNF6	1	1	1	1	1	1	1	1	1	1	40.797	1	1	113.223	1	41.5597
C1QTNF9B.AS1	1	1	1	1	1	1	1	1	47.7605	1	1	1	1	1	1	1
C1R	436.823	1	1	1	1	1	1	1	1	1	886.657	1144.66	1642.98	823.72	538.968	975.468
C1RL	1	1	1	1	1	1	1	1	1	1	40.6115	49.3381	67.4136	40.6042	1	33.0045
C1S	407.725	1	1	1	1	1	1	1	1	1	921.626	1379.72	2032.56	1033.63	691.127	947.42
C1orf106	1	1	1	1	1	1	1	1	35.8595	1	1	1	1	1	1	1
C1orf115	1	57.7594	1	1	1	1	1	1	1	1	1	1	1	1	1	1
C1orf116	1	1	1	1	1	1	1	1	50.8919	1	1	1	1	1	1	1
C1orf131	1	1	1	1	1	1	1	1	37.5529	1	1	1	1	52.9566	1	26.7062
C1orf162	1	1	68.6883	454.796	418.747	1	1	104.649	1	254.695	1	1	1	1	1	1
C1orf174	1	1	1	1	1	1	1	1	1	1	1	1	1	1	1	21.2115
C1orf186	1	1	1	1	1	1	1	1	1	575.413	1	1	1	1	1	1
C1orf198	56.7657	1	1	1	1	1	1	1	1	1	35.222	1	1	48.9806	1	26.6745
C1orf228	1	1	1	1	1	1	1	1	1	122.556	1	1	1	1	1	1
C1orf35	44.1966	1	1	1	1	1	1	1	67.5686	1	1	1	1	1	1	32.2996
C1orf54	117.64	166.9	1	67.2285	87.8789	1	1	1	1	1	73.8378	1	45.3235	1	67.5769	1
C1orf56	56.0231	1	130.095	150.548	76.3522	117.444	1	1	62.8027	65.5773	80.2535	1	41.2064	1	102.372	49.3911
C1orf63	61.7389	129.537	72.3868	149.866	130.44	88.7419	51.4245	1	46.1619	192.138	93.0545	1	1	1	1	1
C1orf86	1	1	1	1	1	1	1	1	1	1	52.4307	1	1	1	1	1
C2	1	1	1	1	79.7306	1	1	1	1	1	41.938	97.929	87.2489	53.536	1	140.681
C20orf27	145.373	1	1	74.8526	46.2945	1	1	1	37.237	1	57.0229	1	53.1597	31.17	60.3339	37.6645
C21orf2	42.466	1	1	1	1	1	1	1	1	1	1	1	1	31.9942	1	33.3511
C21orf33	1	1	1	1	1	1	1	1	1	1	32.4868	1	1	1	1	1
C21orf59	49.8568	73.0202	1	1	1	1	1	1	57.222	1	32.8468	1	44.8376	1	63.119	28.1106
C21orf91	1	1	1	1	1	1	1	1	1	57.1489	1	1	1	1	1	1
C2CD4B	1	86.2381	1	1	1	1	1	1	1	1	1	1	1	1	1	1
C2orf40	105.987	1	1	1	1	1	1	1	1	1	1	1	1	1	1	1
C2orf49	1	1	1	1	1	1	1	1	1	1	37.5858	1	1	1	1	1
C2orf68	1	1	1	1	1	1	1	1	40.8179	1	1	1	1	1	1	1
C2orf74	1	1	1	1	1	1	1	1	1	1	1	1	30.7862	1	1	1
C2orf88	1	1	1	1	1	1	29.948	1	1	1	1	1	1	1	1	1
C3	1	1	1	1	103.589	1	1	1	110.131	1	255.715	194.961	2051.09	448.403	340.499	1380.74
C3AR1	1	1	1	105.329	175.131	1	1	1	1	64.1374	1	1	1	1	1	1
C3orf58	1	1	1	1	1	1	1	1	1	1	35.4692	1	1	1	1	34.2189
C4orf32	55.9099	108.422	1	1	1	1	1	1	1	1	1	1	1	1	1	1
C5AR1	1	1	1	319.82	339.85	1	1	1	1	1	1	1	1	1	1	1
C5orf45	1	1	1	1	1	1	1	1	1	1	1	1	34.1182	1	1	1
C5orf46	1	1	1	1	1	1	1	1	1	1	1	1	1	80.5118	1	1
C5orf56	1	1	1	1	1	145.741	47.3086	1	1	1	1	61.3852	44.9643	40.9305	1	1
C6orf1	1	1	1	43.4125	58.9475	78.7102	1	1	48.4244	1	1	1	32.164	50.7652	1	42.3264
C6orf120	1	1	1	1	1	1	1	1	1	1	1	1	36.682	1	1	1
C6orf132	1	1	1	1	1	1	1	1	74.3809	1	1	1	1	1	1	1
C6orf47	1	1	1	1	1	1	1	1	1	1	1	1	1	1	1	27.1339
C7	146.198	103.2	1	1	1	1	1	1	1	1	627.979	1	854.29	1	410.567	115.865
C7orf49	1	1	1	1	1	1	1	1	1	1	1	1	1	1	1	25.6197
C8orf4	152.473	329.694	1	1	1	1	1	1	69.6347	1	216.898	368.011	46.8944	1	1	1
C9orf3	137.711	89.2657	1	1	1	1	1	1	37.4152	1	118.253	133.067	50.3478	116.031	139.414	69.8563
C9orf72	1	1	1	83.6832	58.4316	1	1	1	1	1	1	1	1	1	1	1
CA12	1	1	1	1	1	1	1	1	1	1	1	1	1	1	1	60.8828
CA2	1	108.671	1	1	1	1	1	1	1	1	1	1	1	1	1	1
CAB39	1	1	1	64.5159	83.7307	1	1	1	41.909	1	1	1	1	1	1	25.8574
CABIN1	68.3738	1	1	1	1	77.1496	1	1	1	1	34.6985	38.3553	49.9014	22.1471	1	1
CACNA1C	1	1	1	1	1	1	1	1	1	1	1	1	1	30.0805	1	1
CACNA1H	52.5134	1	1	1	1	1	1	1	1	1	1	1	1	1	1	1
CACNA2D1	1	1	1	1	1	1	1	1	1	1	1	1	1	1	1	36.4527
CADM1	1	1	1	1	1	1	84.0221	1	1	1	51.4687	1	1	52.7283	1	1
CADM3	1	1	1	1	1	1	1	1	1	1	1	1	1	1	1	89.5884
CADPS	1	1	1	1	1	1	1	1	1	108.496	1	1	1	1	1	1
CADPS2	1	36.9033	1	1	1	1	1	1	1	1	1	1	1	1	1	1
CALB2	1	1	1	1	1	1	1	1	1	178.454	1	1	1	1	1	207.143
CALCOCO1	57.2607	39.9614	1	1	1	1	36.7475	1	1	1	40.5549	1	72.4305	46.743	68.111	47.9822
CALCRL	1	359.912	1	1	1	1	1	1	1	1	1	1	1	1	1	1
CALD1	3734	592.737	1	1	1	1	1	1	100.061	1	2774.51	2946.75	1308.1	2487.09	1650.11	1423.82
CALHM2	76.5967	44.6686	1	1	1	1	1	1	1	1	54.8902	1	60.5481	35.4033	1	55.1021
CAMK1	53.4184	1	1	65.3475	55.0141	1	1	1	1	1	43.2234	1	43.6216	1	1	1
CAMK1D	1	1	1	62.0565	55.5791	1	1	69.7301	1	1	1	1	1	1	1	1
CAMK2D	44.8578	1	1	1	1	1	1	1	28.4056	1	39.4483	1	77.6549	52.7769	1	45.7646
CAMK2G	55.8303	1	1	1	1	1	1	1	1	1	1	1	1	1	1	1
CAMK2N1	137.351	1	1	1	1	1	1	1	134.644	1	144.69	66.7828	74.5745	1	1	1
CAMK4	1	1	130.179	1	1	83.26	1	1	1	1	1	1	1	1	1	1
CAMKK2	1	1	1	1	1	1	1	1	57.8383	1	1	1	1	1	1	1
CAMTA2	1	1	1	1	1	1	1	1	1	1	1	1	1	34.7048	1	1
CANT1	1	1	1	1	1	1	1	1	69.8214	1	1	1	1	31.0674	1	24.3396
CAP2	57.3831	1	1	1	1	1	1	1	1	1	1	1	1	1	1	1
CAPG	1	1	108.93	471.067	831.948	150.703	40.6542	217.548	121.055	880.01	1	1	41.4429	77.7255	53.8357	106.039
CAPN7	1	1	1	1	1	1	1	1	1	1	1	70.7544	1	1	1	1
CAPS	1	1	1	1	1	1	1	1	70.1215	1	1	1	1	1	1	1
CARD16	1	141.932	255.91	246.767	174.974	204.011	1	75.0332	1	116.052	45.346	141.896	1	1	1	46.2755
CARD19	1	1	1	1	1	1	1	1	1	1	1	45.9998	38.9738	54.4125	53.7884	44.6233
CARD8	1	100.895	87.6291	71.9483	46.4903	84.864	1	1	1	1	1	1	1	1	1	1
CARM1	1	1	1	1	1	1	1	1	1	1	1	1	1	25.386	1	1
CARMN	111.523	1	1	1	1	1	1	1	1	1	1	74.3276	1	1	1	1
CARS2	1	1	1	49.9477	1	1	1	1	1	1	1	1	1	1	1	28.9585
CASK	1	1	1	1	1	1	1	1	1	1	1	1	1	29.483	1	1
CASKIN2	1	83.9453	1	1	1	1	1	1	1	1	1	1	1	1	1	1
CASP1	1	1	90.7859	159.902	117.909	110.313	1	1	1	1	1	1	1	1	1	1
CASP10	1	1	1	1	1	1	46.7569	1	1	1	1	1	1	1	1	1
CASP3	1	1	1	1	1	68.2897	69.5884	1	1	1	1	1	1	1	1	1
CASP7	1	1	1	1	1	1	1	1	1	1	1	1	1	29.6472	1	1
CASP8	1	1	112.897	66.7451	1	148.446	1	64.6702	1	1	1	1	1	1	1	1
CASZ1	1	1	1	1	1	1	1	1	34.853	1	1	1	1	1	1	1
CAT	67.1328	46.8983	1	97.9684	89.4561	1	1	66.5566	47.7593	1	1	48.4245	59.6998	36.6485	49.9637	34.918
CATSPER1	1	1	1	1	1	1	1	1	1	123.415	1	1	1	1	1	1
CAV1	754.92	855.596	1	1	1	1	46.329	1	70.4177	1	207.013	464.029	226.358	214.291	187.047	593.181
CAV2	242.398	185.821	1	1	1	1	1	1	96.1401	1	99.6986	178.661	48.5037	80.2054	89.0632	109.221
CBFA2T2	1	1	1	1	1	1	1	1	35.3698	1	1	1	1	1	1	1
CBL	1	1	1	82.5457	44.4682	1	1	1	1	1	1	1	1	1	1	1
CBLB	1	44.6103	1	1	1	158.905	1	1	1	1	51.8035	1	34.4291	32.9013	49.6192	54.5442
CBR4	1	1	1	1	1	1	1	1	41.8652	1	1	1	1	1	1	1
CBX4	1	1	1	1	1	1	1	1	38.674	1	39.6369	1	1	1	1	1
CCDC102B	230.483	1	1	1	1	1	1	1	1	1	164.21	63.6846	1	1	1	1
CCDC104	1	52.5816	1	1	1	1	1	1	1	1	35.5467	1	1	1	1	1
CCDC109B	1	1	145.119	86.3243	68.4516	90.0888	1	83.2666	1	1	1	1	68.8278	40.6953	1	59.6628
CCDC112	1	1	1	1	33.3976	1	1	1	1	1	1	1	1	1	1	1
CCDC117	1	1	1	1	1	1	30.4295	1	1	1	1	1	1	1	1	1
CCDC127	1	1	1	1	1	1	1	1	1	1	1	1	32.0161	1	1	1
CCDC130	1	1	1	1	1	1	1	1	1	1	1	1	1	31.4916	1	1
CCDC14	44.1693	1	1	1	1	1	1	1	64.8505	1	27.243	72.4188	1	61.7975	101.802	44.011
CCDC167	1	1	142.583	41.4169	1	104.795	82.404	1	65.4038	1	41.3858	54.2688	1	42.6106	54.4365	42.1517
CCDC186	1	1	1	1	1	1	1	1	56.4711	1	1	94.5273	41.5192	30.6871	76.4139	36.1896
CCDC28A	1	1	75.9909	36.8409	46.1845	1	1	1	28.5131	59.6331	1	1	1	1	1	24.4011
CCDC28B	1	1	1	1	1	1	1	1	1	1	1	1	1	30.4209	1	34.6901
CCDC3	96.8838	59.2562	1	1	1	1	1	1	1	1	60.4876	1	1	1	1	1
CCDC34	1	1	1	1	1	1	1	1	1	1	1	1	1	31.4185	1	1
CCDC50	61.1557	164.674	1	57.5328	39.3903	1	52.2088	199.021	60.4464	1	90.3175	99.8945	87.9987	46.2852	76.6439	49.0653
CCDC57	1	1	1	1	1	1	40.253	1	65.6039	1	1	1	1	1	1	1
CCDC6	1	1	1	1	1	1	1	1	58.8585	1	1	1	1	29.4636	1	45.4873
CCDC64B	1	1	1	1	1	1	1	1	40.5223	1	1	1	1	1	1	1
CCDC66	40.4188	1	86.1764	1	1	66.7869	1	1	1	1	34.7679	56.0334	47.1292	21.241	61.1759	34.7709
CCDC68	1	1	1	1	1	1	1	1	1	1	44.4871	71.1957	1	1	1	1
CCDC69	1	71.6981	1	50.2418	1	80.3647	56.0776	72.4765	1	1	1	1	1	1	1	1
CCDC71L	1	1	1	1	1	1	1	1	1	1	58.946	1	1	1	1	50.2563
CCDC8	1	1	1	1	1	1	1	1	1	1	1	1	44.2196	30.3398	52.95	37.9969
CCDC80	179.588	1	1	1	1	1	1	1	1	1	432.683	298.515	2660.06	871.506	954.14	2459.99
CCDC88A	43.516	51.71	1	104.889	128.975	1	53.7701	1	1	114.161	31.8413	1	32.1565	36.4144	52.1061	38.4819
CCDC88B	1	1	1	53.577	1	1	1	1	1	1	1	1	1	1	1	1
CCDC88C	1	1	91.7639	1	1	110.351	43.4563	1	1	1	1	1	1	1	1	1
CCDC91	49.0374	1	1	1	33.9934	1	1	1	28.0036	51.4142	33.1893	48.8105	36.7378	47.3341	1	32.61
CCDC92	1	1	1	1	1	1	1	1	1	1	1	1	1	36.1918	1	1
CCL11	1	1	1	1	1	1	1	1	1	1	1	1095.17	1	1	1	1
CCL13	1	1	1	1	1	1	1	1	1	1	1	836.982	1	1	1	1
CCL14	1	170.212	1	1	1	1	1	1	1	1	1	1	1	1	1	1
CCL18	1	1	1	1	2091.35	1	1	1	1	1	1	1	1	1	1	1
CCL19	1	1	1	1	1	1	1	1	1	1	986.808	1	1	1	1	1
CCL2	395.029	408.586	1	355.687	502.122	1	1	1	1	1	1291.76	716.808	238.204	203.716	423.738	502.603
CCL20	1	1	1	1	217.614	1	1	1	1	1	1	1	1	1	1	1
CCL21	345.313	1	1	1	1	1	1	1	1	1	945.036	1	1	1	1	1
CCL3	1	1	1	773.781	926.985	1030.62	1	1	1	1	1	1	1	1	1	1
CCL3L3	1	1	1	1	266.04	1	1	1	1	1	1	1	1	1	1	1
CCL4	1	1	216.829	645.485	646.614	3935.46	1	1	1	1	1	1	1	1	1	1
CCL4L2	1	1	1	1	342.556	1005.17	1	1	1	1	1	1	1	1	1	1
CCL5	1	1	1025.46	92.0321	1	5506.74	143.849	1	1	1	1	1	1	1	1	1
CCM2	1	39.068	87.5735	56.7236	33.95	90.5168	49.3564	1	1	1	35.9682	1	35.1019	51.9298	1	34.3982
CCM2L	1	42.6228	1	1	1	1	1	1	1	1	1	1	1	1	1	1
CCNB1IP1	1	1	1	1	1	1	1	1	48.1114	1	35.2125	50.297	35.962	29.6377	67.2975	28.017
CCNC	42.4764	39.6892	1	1	31.9725	1	65.7517	1	68.6896	1	50.1107	42.8775	38.1692	41.1457	64.4601	48.7606
CCND1	181.141	155.657	1	1	1	1	1	1	214.72	1	118.807	74.3922	1	68.8087	1	1
CCND2	95.6995	1	150.7	1	1	212.136	85.073	1	1	1	96.3918	112.253	96.0204	83.7424	1	77.8485
CCND3	42.3436	76.8433	184.292	101.603	57.3084	273.186	1	156.965	55.3692	49.8793	29.1574	1	52.1627	31.3719	1	44.4466
CCNG2	1	1	1	1	49.9253	1	1	1	97.9768	142.481	1	46.3895	1	35.6174	1	23.5129
CCNH	60.2931	1	108.123	68.9832	51.2126	109.892	42.4587	78.6349	1	79.7051	56.6295	1	59.5297	1	1	1
CCNK	1	1	1	1	1	1	1	1	32.7506	1	1	1	1	1	1	28.9452
CCNL2	82.3712	91.8569	81.1724	1	1	1	55.4144	1	53.0205	55.9688	72.8871	72.7898	56.2635	61.3895	1	48.5849
CCNT1	1	53.0037	1	1	1	1	1	1	1	1	1	1	1	1	1	1
CCR1	1	1	1	89.4246	119.392	1	1	1	1	1	1	1	1	1	1	1
CCR10	1	1	1	1	1	1	59.2949	1	1	1	1	1	1	1	1	1
CCR6	1	1	1	1	1	1	1	91.8809	1	1	1	1	1	1	1	1
CCR7	1	1	228.853	1	1	1	1	166.468	1	1	1	1	1	1	1	1
CCRL2	1	1	1	1	51.6177	1	1	1	1	1	1	1	1	1	1	1
CCSER2	69.4715	61.8117	122.418	1	1	153.285	1	1	32.3848	1	60.3476	75.7448	52.1747	65.1518	97.9265	34.8268
CD109	1	64.5314	1	1	1	1	1	1	1	1	1	1	1	41.6128	1	34.657
CD14	1	1	1	669.134	962.332	1	1	1	1	1	1	1	1	1	1	1
CD163	1	1	1	160.008	352.809	1	1	1	1	1	1	1	1	1	1	1
CD19	1	1	1	1	1	1	1	216.299	1	1	1	1	1	1	1	1
CD1C	1	1	1	153.58	1	1	1	1	1	1	1	1	1	1	1	1
CD1D	1	1	1	56.0643	1	1	1	1	1	1	1	1	1	1	1	1
CD2	1	1	919.723	1	1	1223.75	1	1	1	1	1	1	1	1	1	1
CD200	1	64.426	1	1	1	1	1	1	1	1	1	1	1	25.5544	62.2749	78.2176
CD22	1	1	1	1	1	1	1	193.095	1	97.2541	1	1	1	1	1	1
CD24	1	1	1	1	1	1	1	238.026	433.97	1	1	114.267	1	1	219.036	1
CD247	1	1	244.784	1	1	362.204	1	1	1	1	1	1	1	1	1	1
CD248	129.934	1	1	1	1	1	1	1	1	1	89.4229	64.4966	262.375	100.663	70.6818	117.558
CD27	1	1	377.45	1	1	368.833	268.856	222.241	1	1	1	1	1	1	1	1
CD276	46.1529	1	1	1	1	1	1	1	1	1	62.4174	1	64.7331	104.719	77.0894	42.4133
CD28	1	1	77.859	1	1	1	1	1	1	1	1	1	1	1	1	1
CD2AP	1	52.157	1	1	1	1	1	1	68.7482	1	1	1	1	1	1	1
CD300A	1	1	1	132.657	124.129	1	1	1	1	60.145	1	1	1	1	1	1
CD300E	1	1	1	103.522	1	1	1	1	1	1	1	1	1	1	1	1
CD300LF	1	1	1	53.1947	62.4318	1	1	1	1	1	1	1	1	1	1	1
CD302	1	1	1	117.345	103.667	1	1	1	1	1	60.7098	97.2443	117.523	1	1	1
CD320	1	217.534	1	1	1	1	36.5041	1	40.2652	1	45.6044	1	39.3291	1	63.3407	53.9118
CD33	1	1	1	66.6239	45.7755	1	1	1	1	72.4687	1	1	1	1	1	1
CD34	1	393.327	1	1	1	1	1	1	1	1	1	1	108.976	1	1	1
CD36	207.812	180.22	1	135.532	98.9085	1	1	1	1	1	1	1	1	1	1	1
CD37	1	1	534.8	370.923	308.203	533.917	100.159	1704.62	1	654.847	1	1	1	1	1	1
CD38	1	1	1	1	1	1	193.809	1	1	71.0969	1	1	1	1	1	1
CD3D	1	1	1110.64	1	1	1367.9	80.6637	1	1	1	1	1	1	1	1	1
CD3E	1	1	860.264	1	1	925.518	1	1	1	1	1	1	1	1	1	1
CD3G	1	1	374.769	1	1	478.733	1	1	1	1	1	1	1	1	1	1
CD4	1	1	99.4175	141.296	165.078	1	1	1	1	1	1	1	1	1	1	1
CD40	1	75.7741	1	59.5826	64.6452	1	1	191.161	1	1	34.4631	37.8626	53.9702	1	1	1
CD40LG	1	1	114.241	1	1	1	1	1	1	1	1	1	1	1	1	1
CD44	172.712	1	443.588	542.625	476.746	448.662	166.685	261.093	178.629	888.413	111.471	100.759	110.168	116.091	1	105.872
CD48	1	1	393.49	257.642	121.354	422.117	47.937	455.686	1	146.899	1	1	1	1	1	1
CD5	1	1	105.818	1	1	1	1	1	1	1	1	1	1	1	1	1
CD52	1	1	1557.04	645.247	500.803	2045.31	145.981	1980.54	1	698.574	1	1	1	1	1	1
CD53	1	1	347.925	427.653	389.834	456.048	93.4184	555.284	1	146.065	1	1	1	1	1	1
CD58	1	59.4091	84.6492	103.206	83.1181	1	1	1	1	1	1	1	1	1	1	1
CD6	1	1	197.647	1	1	175.18	1	1	1	1	1	1	1	1	1	1
CD68	1	1	1	479.782	1374.84	1	1	1	1	127.589	1	1	46.5679	40.5315	1	1
CD69	1	1	863.385	98.132	1	947.222	70.1181	773.055	1	2086.94	1	1	1	1	1	1
CD7	1	1	619.775	1	1	1187.9	1	1	1	1	1	1	1	1	1	1
CD72	1	1	1	1	36.2474	1	1	106.821	1	1	1	1	1	1	1	1
CD74	102.887	2526.51	1075.83	9846.27	10005.8	1787	1252.28	13874.7	519.375	568.379	183.045	183.865	253.246	201.615	159.134	399
CD79A	1	1	1	1	1	1	651.889	1352.19	1	1	1	1	1	1	1	1
CD79B	1	47.3886	1	1	1	1	77.6297	576.96	1	1	1	1	1	1	1	1
CD82	40.8288	1	122.874	51.6573	80.8148	128.481	1	184.189	65.3768	274.996	1	75.2443	1	57.1443	1	45.0942
CD83	1	1	1	260.02	225.773	1	1	462.848	1	254.533	1	1	1	1	1	1
CD84	1	1	122.242	83.5922	166.272	117.532	1	1	1	250.64	1	1	1	1	1	1
CD86	1	1	1	151.926	154.92	1	1	1	1	1	1	1	1	1	1	1
CD8A	1	1	169.932	1	1	743.956	1	1	1	1	1	1	1	1	1	1
CD8B	1	1	135.726	1	1	438.739	1	1	1	1	1	1	1	1	1	1
CD9	369.128	661.269	1	187.375	483.796	1	48.3922	1	663.656	1310.43	214.446	146.023	175.979	153.948	149.835	179.556
CD93	1	494.611	1	157.097	98.0193	1	1	1	1	1	1	1	1	1	1	1
CD96	1	1	229.807	1	1	311.949	1	1	1	1	1	1	1	1	1	1
CD97	1	1	1	128.393	130.338	1	1	1	1	1	1	1	1	1	1	1
CDA	1	95.0497	1	124.434	1	1	1	1	72.3227	1	1	1	1	1	1	1
CDC16	1	1	1	1	1	1	1	1	1	1	1	1	1	31.4976	1	42.5477
CDC25B	1	1	1	1	1	64.379	1	1	1	1	1	1	1	1	1	1
CDC27	1	59.7708	1	1	1	1	1	1	1	1	26.4032	53.6731	1	28.6742	1	1
CDC37L1	1	1	1	1	1	1	1	1	1	1	31.3851	51.9551	1	30.7586	1	25.0767
CDC42EP2	1	1	1	1	1	1	1	1	1	1	1	1	43.567	1	1	26.71
CDC42EP3	1	104.801	100.674	106.511	55.8079	101.993	1	1	1	87.1226	1	1	1	68.3435	1	35.7269
CDC42EP4	56.4752	68.6305	1	1	1	1	1	1	1	1	1	1	57.6073	1	1	1
CDC42EP5	1	1	1	1	1	1	1	1	56.7707	1	48.3759	1	1	1	1	1
CDC42SE1	78.2623	62.3667	187.504	221.034	166.625	175.673	1	112.743	86.6364	86.1592	90.1787	1	53.2981	42.2026	1	36.0442
CDC42SE2	1	36.4255	210.614	127.416	77.9456	228.821	56.0312	143.65	45.6852	87.8123	1	1	1	1	1	1
CDCA7L	1	1	1	1	1	1	1	1	1	1	1	1	1	1	1	26.3643
CDCP1	1	1	1	1	1	1	1	1	36.387	1	1	1	1	1	1	1
CDH1	1	1	1	1	1	1	1	1	96.6344	1	1	1	1	1	1	1
CDH11	89.0868	1	1	1	1	1	1	1	1	1	169.87	373.486	173.379	406.293	434.747	253.83
CDH13	1	120.086	1	1	1	1	1	1	1	1	1	1	1	1	1	1
CDH2	1	1	1	1	1	1	1	1	1	1	1	1	1	1	1	35.6576
CDH5	1	289.28	1	1	1	1	1	1	1	1	1	1	1	1	1	1
CDH6	172.155	1	1	1	1	1	1	1	1	1	1	1	1	1	1	1
CDK10	1	1	1	1	1	1	1	1	1	1	1	1	35.3642	35.4827	1	36.9764
CDK11B	1	41.7062	1	1	1	1	1	1	1	1	1	1	1	1	1	1
CDK13	1	1	1	1	1	1	1	1	1	1	1	1	1	33.1444	1	1
CDK14	1	1	1	1	1	1	42.7008	1	1	1	1	1	1	38.507	1	1
CDK15	1	1	1	1	1	1	1	1	1	85.9129	1	1	1	1	1	1
CDK17	1	58.3185	1	1	1	1	1	1	1	1	1	1	1	1	1	1
CDK19	1	1	1	1	1	1	1	1	44.7718	1	1	1	1	1	1	1
CDK2AP1	1	54.2799	1	1	1	1	1	1	1	1	51.6663	1	1	33.4036	1	1
CDK5RAP2	1	1	1	1	1	1	1	1	1	1	1	1	1	27.8513	1	1
CDK6	41.6474	1	1	1	1	1	1	1	47.1825	1	51.3985	65.2582	1	33.435	1	44.4586
CDK9	1	42.9462	1	1	1	1	1	1	1	1	1	1	1	1	1	1
CDKN1B	65.4828	47.6051	184.588	65.5378	51.0251	156.818	77.6355	99.4005	31.804	51.7226	36.0669	1	43.5737	1	1	1
CDKN1C	48.1381	59.9913	1	1	1	1	1	1	1	1	127.514	55.7893	112.751	35.9423	1	63.4191
CDKN2A	1	1	1	1	1	1	1	1	91.291	1	1	1	51.3719	48.8099	1	36.869
CDKN2AIP	1	1	1	1	1	1	1	1	1	52.5501	1	1	1	1	1	1
CDKN2B	1	1	1	1	1	1	1	1	1	1	1	1	1	30.9065	1	1
CDKN2C	45.3609	1	1	1	1	1	42.0753	1	1	1	1	1	65.2693	1	1	1
CDKN2D	1	1	1	59.8667	1	1	1	1	1	1	1	1	1	1	1	1
CDO1	1	1	1	1	1	1	1	1	1	1	1	1	40.4464	1	1	1
CDON	1	1	1	1	1	1	1	1	1	1	1	1	35.5952	1	1	1
CEACAM6	1	1	1	1	1	1	1	1	246.926	1	1	1	1	1	1	1
CEBPA	1	1	1	1	37.543	1	1	1	1	1	1	1	1	1	1	1
CEBPZOS	1	1	1	1	1	1	1	1	46.9646	1	1	1	53.2521	25.3694	1	23.5473
CECR1	1	1	1	104.609	132.614	1	77.511	1	1	1	1	1	1	1	1	1
CELF2	1	1	261.594	272.959	208.087	330.225	36.1926	194.534	1	183.886	1	1	78.76	35.3144	90.2493	61.0315
CENPC	1	1	81.6599	1	1	1	1	1	1	56.2399	47.2022	1	1	1	1	1
CENPT	1	1	1	1	1	1	1	1	1	1	1	1	38.762	25.9626	1	24.7958
CENPW	1	1	1	1	1	1	1	1	1	1	1	1	1	1	1	100.483
CEP164	1	1	1	1	1	1	1	1	1	1	33.379	51.7284	1	1	1	23.8319
CEP290	1	1	1	1	1	1	1	1	1	1	56.4709	1	1	35.1282	1	33.253
CEP57	38.0328	1	1	1	1	101.734	1	63.0766	45.282	49.4263	43.8374	53.6883	44.1061	33.6851	1	33.6101
CEP68	1	69.1532	1	1	1	1	1	1	1	1	1	1	1	1	1	1
CEP89	1	1	1	1	1	1	1	1	1	1	1	1	1	26.829	1	1
CERCAM	59.947	1	1	1	1	1	1	1	1	1	114.606	81.7388	155.583	340.187	152.785	196.483
CERS4	1	1	1	1	1	1	1	68.0889	50.0692	1	1	1	1	1	1	1
CERS5	1	1	1	1	1	1	1	1	1	1	1	1	1	31.3129	1	1
CES2	1	1	1	1	1	1	1	1	67.1807	1	1	1	42.845	1	1	1
CFAP97	1	1	1	1	1	1	1	1	30.6986	1	48.1869	71.7351	73.7221	58.1707	1	55.5245
CFB	1	1	1	1	1	1	1	1	1	1	1	1	47.926	1	1	233.65
CFD	1	1	1	272.453	460.098	1	1	1	1	1	104.18	1428.87	4302.62	1	1	1
CFH	170.935	126.339	1	1	1	1	1	1	1	1	315.264	352.327	379.257	223.589	268.952	287.344
CFI	1	82.4313	1	1	1	1	1	1	1	1	73.221	1	104.816	74.1317	1	154.577
CFL2	90.5931	1	1	1	1	1	29.167	1	1	1	43.1751	39.4338	48.7509	41.3722	59.9151	50.7876
CFP	1	1	1	195.728	1	1	1	1	1	1	1	1	1	1	1	1
CH17.189H20.1	1	1	1	1	1	1	1	1	1	1	1	83.811	1	40.8344	1	32.6242
CH25H	1	1	1	1	1	1	1	1	1	1	61.5743	201.931	1	1	1	1
CHCHD7	1	1	1	65.0163	65.5559	73.0321	46.6352	71.0192	75.9306	1	27.952	1	1	25.9222	1	23.9856
CHD3	1	53.7575	77.988	1	1	1	1	1	52.8236	1	50.1198	54.078	78.5038	59.4038	68.0277	36.2271
CHD7	1	50.1342	1	1	1	1	1	60.9772	1	55.9408	1	1	1	1	1	1
CHI3L1	1	1	1	1	1	1	1	1	1	1	1	1	80.2543	1	1	68.434
CHIC2	1	65.8934	74.6001	49.2522	34.1795	89.5193	1	1	36.9076	1	57.4991	107.961	47.8232	51.2301	1	45.0932
CHID1	57.1188	55.4781	1	40.3071	53.5632	1	105.298	1	74.0259	1	89.2563	116.286	140.932	103.101	92.101	120.581
CHKA	1	1	1	1	1	1	1	1	1	51.0168	1	1	1	1	1	1
CHL1	1	1	1	1	1	1	1	1	1	1	1	1	56.6051	1	1	1
CHMP4C	1	1	1	1	1	1	1	1	58.1869	1	1	1	1	1	1	1
CHMP6	1	1	1	1	1	1	1	1	1	1	1	1	29.6259	1	1	1
CHMP7	1	1	67.8583	1	1	1	1	68.8522	1	1	1	1	1	1	1	1
CHN1	133.713	1	1	1	1	1	1	1	1	1	42.1489	1	1	92.8501	1	1
CHN2	1	1	1	1	1	1	1	1	1	69.4991	1	1	1	1	1	1
CHPF	63.7718	1	1	1	1	1	103.279	1	88.6174	1	124.694	110.152	182.692	338.111	247.645	216.579
CHPF2	1	1	1	1	1	1	1	1	1	1	1	1	1	47.7188	1	28.8832
CHPT1	1	1	1	50.7548	41.4272	1	1	1	41.1099	59.8705	26.6232	1	1	1	1	1
CHRAC1	41.2514	1	1	1	1	1	1	1	36.7883	1	1	1	1	1	1	1
CHRD	38.6642	1	1	1	1	1	1	1	1	1	1	1	1	1	1	1
CHRDL1	1	1	1	1	1	1	1	1	1	1	1	1	130.786	1	1	1
CHST11	1	1	66.8806	71.968	75.2829	85.4547	1	1	1	1	1	1	1	41.7657	1	1
CHST12	1	107.337	1	1	1	219.919	53.1867	1	1	89.6593	35.2723	41.8807	55.7899	56.1627	119.904	44.6079
CHST14	1	1	1	1	1	1	1	1	1	1	1	1	40.4591	36.9818	1	1
CHST15	1	1	1	70.7214	37.9489	1	1	1	1	1	1	1	1	50.4492	1	1
CHSY1	51.6474	59.167	1	1	1	1	1	1	1	1	66.0325	1	1	39.8897	1	1
CIC	1	1	1	1	1	1	1	1	1	1	1	1	32.6062	28.1523	1	1
CIITA	1	1	1	41.084	1	1	1	1	1	1	1	1	1	1	1	1
CILP	1	1	1	1	1	1	1	1	1	1	1	1	176.066	127.432	1	33.9973
CILP2	1	1	1	1	1	1	1	1	1	1	1	1	1	49.9271	1	43.4431
CISD2	42.9609	1	1	78.2757	100.655	73.9606	120.008	1	76.6939	1	50.6497	58.2552	31.6445	59.8895	64.1955	47.3445
CIZ1	1	1	1	1	1	1	1	1	1	1	35.7369	1	1	49.8197	1	32.2802
CKAP4	54.1841	40.6869	1	54.0125	1	1	44.6727	1	50.7939	1	72.6004	82.1588	95.912	179.29	187.773	162.451
CKB	115.53	1	1	1	1	1	1	1	217.825	1	47.0235	1	106.228	1	87.2225	1
CKS1B	1	1	1	47.19	1	1	1	1	126.93	1	36.5477	58.9343	71.992	1	68.3876	41.3607
CKS2	55.1342	65.4537	1	123.144	61.9102	98.8856	46.6185	85.2956	78.0025	136.841	1	1	1	1	1	41.3134
CLASRP	1	1	1	1	1	1	1	1	1	1	1	1	1	26.4522	1	1
CLCN3	1	45.5306	1	1	1	1	1	1	48.5417	80.787	36.266	1	39.0581	1	1	1
CLDN1	1	1	1	1	1	1	1	1	78.2203	1	1	1	1	1	1	174.991
CLDN10	1	1	1	1	1	1	1	1	83.7362	1	1	1	1	1	1	1
CLDN11	1	1	1	1	1	1	1	1	1	1	56.4529	1	110.689	1	190.648	105.003
CLDN12	1	1	1	1	1	1	1	1	39.3409	1	1	1	1	1	1	1
CLDN15	1	1	1	1	1	1	1	1	1	1	1	1	1	1	1	40.2649
CLDN3	1	1	1	1	1	1	1	1	268.028	1	1	1	1	1	1	1
CLDN4	1	1	1	1	1	1	1	1	597.026	1	1	1	1	1	1	1
CLDN5	1	1328	1	1	1	1	1	1	1	1	1	1	1	1	1	1
CLDN7	1	1	1	1	1	1	1	1	232.935	1	1	1	1	1	1	1
CLEC10A	1	1	1	162.399	1	1	1	1	1	1	1	1	1	1	1	1
CLEC11A	189.654	1	1	1	50.7096	1	1	1	1	1	311.964	250.041	289.871	353.394	237.982	270.154
CLEC12A	1	1	1	82.7965	39.4496	1	1	1	1	1	1	1	1	1	1	1
CLEC14A	1	640.375	1	1	1	1	1	1	1	1	1	1	1	1	1	1
CLEC2B	49.77	200.505	196.241	177.706	222.156	434.19	47.2761	1	1	1	118.786	125.568	121.977	151.766	1	67.7728
CLEC2D	1	1	267.404	1	1	362.726	1	129.154	1	1	1	1	1	1	1	1
CLEC4A	1	1	1	101.829	74.4241	1	1	1	1	1	1	1	1	1	1	1
CLEC4E	1	1	1	170.197	150.942	1	1	1	1	1	1	1	1	1	1	1
CLEC5A	1	1	1	109.419	72.5144	1	1	1	1	1	1	1	1	1	1	1
CLEC7A	1	1	1	251.574	254.955	1	1	1	1	1	1	1	1	1	1	1
CLECL1	1	1	1	1	1	1	1	137.836	1	1	1	1	1	1	1	1
CLIC2	1	62.7954	1	1	1	1	1	1	1	1	1	1	49.2488	1	1	1
CLIC3	1	1	1	1	1	210.065	1	1	49.2032	1	1	1	1	1	1	53.9761
CLIP3	1	1	1	1	1	1	1	1	1	1	1	1	64.1608	32.0713	1	28.3248
CLIP4	1	1	1	1	54.0424	1	1	1	1	1	1	1	1	1	1	1
CLK4	1	1	1	1	1	1	1	1	1	1	33.2444	1	1	1	1	1
CLMN	115.476	1	1	1	1	1	1	1	39.8202	1	57.7178	1	1	1	1	1
CLMP	1	1	1	1	1	1	1	1	1	1	1	108.142	78.031	86.0498	120.239	68.2316
CLN5	1	1	1	1	32.4635	1	1	1	1	1	45.4854	44.0622	60.744	1	1	38.9741
CLN8	1	38.5379	1	51.999	50.429	1	1	1	1	1	1	40.8613	1	1	1	1
CLNK	1	1	1	1	1	1	1	1	1	98.9421	1	1	1	1	1	1
CLPTM1L	1	1	1	1	38.2459	1	111.228	1	53.7832	1	35.9221	1	1	1	1	1
CLPX	1	1	1	1	1	1	1	1	1	1	1	1	1	1	1	23.0852
CLSTN3	1	1	1	1	1	1	1	1	1	1	1	1	69.3664	1	1	1
CLU	316.034	641.305	1	1	1	1	1	1	691.729	1353.24	213.642	120.96	826.401	179.67	805.02	507.622
CMAS	1	1	1	1	1	1	1	1	46.9305	1	47.6546	1	35.3466	23.1466	47.3587	37.103
CMBL	1	1	1	1	1	1	1	1	55.9722	1	1	1	61.5392	1	1	47.6957
CMC1	61.9065	35.5964	88.7748	39.2769	53.7081	367.074	30.8117	1	56.2237	1	55.6313	1	34.7904	42.4423	1	34.4068
CMC2	47.4155	45.8488	90.5221	55.1566	48.8453	104.834	37.7375	1	50.7761	80.179	48.3637	1	1	36.8632	1	31.1294
CMIP	1	138.352	1	105.787	63.1866	1	1	1	34.6001	64.8702	1	105.187	1	76.4019	1	46.5867
CMKLR1	1	1	1	1	52.3161	1	1	1	1	1	1	1	1	1	1	1
CMSS1	1	50.1464	1	1	1	1	1	1	42.4089	1	41.467	55.7157	53.2653	1	105.278	35.4762
CMTM7	1	1	87.9447	77.1582	82.0883	68.4277	32.676	1	34.1374	1	1	1	1	1	1	1
CNDP2	1	90.4808	1	91.7525	132.712	68.0959	46.9495	107.932	78.3265	1	1	36.6597	1	42.4747	1	1
CNKSR3	1	80.3572	1	1	1	1	1	1	1	1	1	1	1	1	1	23.6959
CNN1	188.022	1	1	1	1	1	1	1	1	1	1	1	1	44.7292	1	68.8151
CNN3	525.219	353.774	1	1	1	1	1	1	107.505	1	425.01	406.869	335.303	475.221	340.632	364.053
CNOT6L	1	66.5362	113.087	55.5118	1	163.978	1	1	28.5272	1	1	1	1	1	1	1
CNOT8	1	1	1	1	39.5648	1	1	1	1	1	1	1	1	1	1	1
CNPPD1	1	1	1	1	1	1	1	79.1688	30.3119	1	1	1	1	1	1	1
CNPY4	1	1	1	1	1	1	1	1	1	1	43.0198	53.4191	39.2246	62.3993	1	24.0238
CNRIP1	35.6377	57.5836	1	1	1	1	1	1	1	216.131	40.5282	56.8798	74.9288	29.9889	1	31.4572
CNST	1	1	1	1	1	1	1	1	1	77.1014	1	1	1	1	1	1
CNTLN	1	1	1	1	1	1	1	1	1	1	1	44.4196	1	42.9596	1	25.9941
CNTN1	1	1	1	1	1	1	1	1	1	1	1	1	1	54.0481	1	1
CNTRL	1	1	1	42.2791	1	65.7007	1	95.7835	1	1	1	1	1	1	1	1
COA1	36.121	47.588	1	1	54.1302	90.0131	37.8794	70.4337	61.5745	1	33.2284	48.6139	1	36.7027	75.4609	34.9332
COASY	1	1	1	1	1	1	1	1	48.5683	1	1	1	1	1	1	1
COBLL1	77.1459	1	1	1	1	1	56.7495	89.6457	62.7875	1	33.4167	1	1	1	1	56.7296
COG4	1	1	1	1	1	1	1	1	1	1	1	1	1	1	1	27.7651
COIL	1	1	1	1	1	1	1	1	32.2389	1	1	1	1	1	1	1
COL10A1	1	1	1	1	1	1	1	1	1	1	166.807	1	1	579.316	1	1
COL11A1	1	1	1	1	1	1	1	1	1	1	1	1	1	711.722	292.342	1
COL12A1	150.331	1	1	1	1	1	1	1	1	1	260.732	402.992	242.595	1272.96	530.721	234.921
COL14A1	257.322	1	1	1	1	1	1	1	1	1	234.469	179.165	528.447	149.472	258.329	176.053
COL15A1	78.4067	410.487	1	1	1	1	1	1	1	1	99.7028	102.167	175.88	142.77	1	1
COL16A1	1	1	1	1	1	1	1	1	1	1	62.7876	81.4696	145.821	202.878	168.142	115.74
COL18A1	944.04	219.891	1	1	1	1	1	1	1	69.3562	491.324	406.147	179.977	309.818	234.518	122.114
COL1A1	3016.68	209.843	1	1	1	1	50.7343	1	100.266	1	6090.24	4314.39	7988.99	24527.1	13775.1	14446.3
COL1A2	2562.92	170.269	1	1	1	1	1	1	57.1043	1	4489.38	3963.14	6507.54	16290.5	8886.43	9186.68
COL27A1	1	1	1	1	1	1	1	1	1	1	1	45.466	1	56.1098	1	24.6828
COL3A1	2105.82	159.222	1	1	1	1	1	1	1	1	4337.21	4031.3	4564.47	12256.6	7350.97	8449.6
COL4A1	1238.54	863.158	1	1	1	1	1	1	1	1	645.806	419.704	120.142	290.607	134.233	52.0431
COL4A2	1066.47	619.204	1	1	1	1	1	1	1	1	643.113	375.907	161.31	283.808	178.978	80.2563
COL4A3BP	1	51.621	1	79.2507	65.8407	1	1	1	30.1288	54.0136	34.9905	1	59.8802	23.5685	1	1
COL4A5	1	1	1	1	1	1	1	1	1	1	1	76.097	1	1	1	29.5886
COL5A1	178.644	1	1	1	1	1	1	1	1	1	372.67	415.937	297.068	1067.4	440.482	482.714
COL5A2	332.438	1	1	1	1	1	1	1	1	1	369.78	479.038	360.385	1526.99	912.445	559.03
COL5A3	106.032	1	1	1	1	1	1	1	1	1	42.4618	1	1	76.635	1	1
COL6A1	733.207	52.9896	1	1	1	1	1	1	43.7721	1	778.189	968.467	1143.7	2229.32	1223.82	949.245
COL6A2	1240.07	143.104	1	1	1	1	1	1	1	1	1175.42	1598.63	1649.75	2684.02	1527.13	1182.28
COL6A3	556.683	1	1	1	1	1	1	1	1	1	1035.71	1052.57	1427.05	2243.34	1039.66	635.505
COL7A1	1	1	1	1	1	1	1	1	1	1	1	59.8345	1	37.0229	1	1
COL8A1	1	1	1	1	1	1	1	1	1	1	124.677	70.3131	189.655	600.543	187.651	372.001
COL8A2	1	1	1	1	1	1	1	1	1	1	1	1	1	106.962	1	1
COL9A3	1	1	1	1	1	1	1	1	1	1	1	1	1	1	177.248	1
COLEC11	174.277	1	1	1	1	1	1	1	1	1	449.93	155.85	1	1	1	1
COLEC12	1	1	1	1	68.2047	1	1	1	1	1	1	1	124.766	91.4792	1	55.0138
COMMD8	1	1	1	65.9272	59.2446	91.1301	1	1	1	1	1	1	1	1	1	1
COMP	1	1	1	1	1	1	1	1	1	1	1	1	1	523.764	1	43.4971
COMTD1	1	1	1	1	1	1	40.858	1	58.3159	1	1	1	1	1	1	26.1428
COPS3	37.3078	1	1	52.3189	38.0491	1	1	1	1	59.6881	1	1	1	31.0848	1	36.2794
COPS4	38.1903	1	1	1	1	1	1	1	1	1	36.373	62.3656	45.4579	30.9274	1	1
COPZ2	1	1	1	1	1	1	1	1	1	1	44.1242	1	47.7138	88.2972	42.8217	91.0633
COQ2	1	1	1	1	33.2646	1	1	1	1	1	1	1	1	1	1	1
COQ4	53.1595	57.0412	1	1	1	1	37.8424	1	62.4254	1	49.7705	58.416	55.1283	53.6705	1	51.091
CORO1A	1	1	841.484	574.725	281.805	1120.38	129.975	851.1	1	73.4224	1	1	1	1	1	1
CORO1B	86.4469	88.3516	270.538	119.509	122.774	174.68	49.1341	94.7821	117.754	46.8137	63.909	57.0304	56.2954	58.8435	1	58.6691
CORO7	1	1	1	49.5479	39.5196	1	1	1	1	1	1	1	1	1	1	1
COTL1	1	130.915	395.401	1118.26	577.234	562.801	65.3329	405.353	91.3945	135.295	53.762	1	1	47.9071	1	52.0543
COX11	49.8325	1	1	1	1	1	1	1	33.1432	1	41.803	60.7893	1	25.941	53.7134	29.5067
COX19	1	1	1	1	1	66.2172	1	1	38.2278	1	1	1	1	1	1	26.9296
COX4I2	360.769	1	1	1	1	1	1	1	1	1	1	1	1	1	1	1
COX6A1P2	1	1	1	1	1	1	1	1	1	1	38.4467	1	1	1	1	1
COX7A1	334.643	195.255	1	1	1	1	1	1	1	1	247.566	220.572	157.805	116.388	1	37.3703
CP	1	1	1	1	1	1	1	1	61.4476	1	1	1	1	1	1	1
CPA3	1	1	1	1	1	1	1	1	1	5144.53	1	1	1	1	1	1
CPE	538.767	1	1	1	1	1	1	1	114.242	1	280.041	92.1703	281.697	169.814	180.131	213.77
CPEB4	1	57.4773	1	65.7646	87.6671	1	132.025	1	36.9555	149.765	43.8032	1	1	1	1	1
CPED1	1	1	1	1	1	1	1	1	1	1	84.2117	81.0792	42.3013	1	72.603	1
CPLX1	1	55.5773	1	1	1	1	1	1	1	1	1	1	1	1	1	1
CPM	175.645	1	1	54.5519	177.674	1	1	1	1	143.921	106.473	1	1	1	1	1
CPNE2	1	84.9564	1	1	1	1	1	1	1	1	1	1	1	1	1	1
CPNE5	1	1	1	1	1	1	64.6432	60.6094	1	1	1	1	1	1	1	1
CPNE8	1	52.2881	1	1	1	1	1	1	1	1	1	39.0359	1	1	1	1
CPPED1	1	1	1	120.331	85.481	1	1	1	1	64.0319	1	1	1	1	1	1
CPSF2	1	1	1	1	1	1	1	1	1	1	1	48.1771	1	1	1	1
CPSF7	1	1	1	1	1	1	1	1	1	1	1	1	35.9099	29.1143	1	1
CPVL	1	1	1	288.643	218.167	1	1	1	1	1	1	1	69.8618	1	199.233	1
CPXM1	1	1	1	1	1	1	1	1	1	1	45.4122	45.3832	185.713	107.972	115.423	160.58
CPXM2	1	59.8922	1	1	1	1	1	1	1	1	1	1	61.599	1	1	1
CR1	1	1	1	1	61.855	1	1	1	1	1	1	1	1	1	1	1
CRABP2	1	1	1	1	1	1	1	1	134.967	1	63.311	1	318.695	374.525	470.722	724.619
CRACR2B	1	1	1	1	1	1	1	1	45.5677	1	1	1	1	1	1	1
CRB2	1	1	1	1	1	1	1	1	1	1	1	1	1	1	1	33.032
CRB3	1	1	1	1	1	1	1	1	47.4375	1	1	1	1	1	1	1
CRBN	48.1931	115.385	71.2254	36.4738	37.5532	70.2516	1	1	32.889	183.191	46.783	68.0277	79.1256	52.1606	1	36.1324
CREB1	50.9921	72.0898	1	52.3738	47.595	1	1	68.8674	34.9403	1	36.2142	62.7521	51.8924	34.8777	1	37.2624
CREB3	46.3783	1	1	1	1	1	39.0076	1	38.43	1	43.0439	40.8284	52.3484	59.6457	1	61.8341
CREB3L1	1	1	1	1	1	1	1	1	60.4212	1	40.723	51.7102	70.8439	139.963	1	67.571
CREB3L2	60.36	49.8877	1	1	35.8099	1	166.933	1	47.5515	81.7635	66.4976	98.3665	45.9909	75.1041	1	56.2892
CREB3L4	1	1	1	1	1	1	1	1	68.139	1	1	1	1	1	1	1
CREB5	1	1	1	136.241	61.1374	1	1	1	1	1	1	1	1	1	1	44.3403
CREBZF	41.6557	54.3849	1	1	1	1	37.6699	1	39.9096	1	36.0652	1	54.1662	39.4267	1	1
CRELD2	58.2343	54.7339	1	49.9424	45.4902	91.5529	281.709	1	64.397	1	61.2173	64.89	45.8101	66.0563	98.5943	68.7206
CRIM1	124.124	154.531	1	1	1	1	1	1	1	1	66.1854	1	1	1	1	37.2184
CRIP1	924.314	153.003	318.919	248.897	134.135	365.9	100.488	203.118	178.081	103.098	140.26	1	104.842	1	1	241.29
CRIP2	537.814	930.917	1	1	1	1	1	1	134.808	1	174.901	110.485	83.8394	138.805	73.2973	115.58
CRISPLD2	424.981	1	1	1	1	1	1	1	1	1	317.13	287.223	221.831	242.379	174.782	205.269
CRLF3	1	1	74.1221	1	1	1	1	1	1	1	1	1	1	1	1	1
CRLS1	1	1	1	1	1	1	1	1	55.3311	1	1	1	45.6884	56.3394	48.8416	66.1578
CRNDE	1	1	1	1	1	1	1	1	76.9078	1	1	1	1	28.1962	1	1
CROT	1	1	1	1	1	1	1	1	1	1	1	1	1	1	1	28.8153
CRTC3	65.1684	1	71.4998	1	1	1	1	1	1	1	35.7761	46.2403	1	30.562	1	33.7424
CRY2	1	1	1	1	1	1	1	1	1	1	1	1	37.6055	1	1	1
CRYAB	313.047	1	1	1	1	1	1	1	1	1	220.051	135.984	123.84	59.5398	105.517	174.272
CRYBG3	1	58.8017	1	1	1	1	1	1	1	1	1	57.5344	47.9561	1	1	1
CRYZ	1	1	1	1	1	1	1	1	35.4982	1	1	1	1	1	1	1
CRYZL1	49.2852	1	1	1	1	1	1	1	1	1	1	1	52.1401	31.5875	1	31.2229
CSAD	1	1	1	1	1	1	1	1	1	1	1	1	35.3993	1	57.0573	35.6166
CSF1	42.0052	1	1	1	1	1	1	1	1	124.311	1	78.174	70.9218	56.0473	1	35.7536
CSF1R	1	1	1	144.006	197.352	1	1	1	1	1	1	1	1	1	1	1
CSF2RA	1	1	1	119.592	119.289	1	1	1	1	1	1	1	1	1	1	1
CSF2RB	1	1	1	108.225	89.701	1	1	1	1	110.854	1	1	1	1	1	1
CSF3R	1	1	1	932.447	626.269	1	1	1	1	1	1	1	1	1	1	1
CSGALNACT1	1	51.6809	1	1	1	1	1	1	1	1	1	1	1	1	1	1
CSGALNACT2	1	1	1	72.3904	54.5631	1	1	1	1	1	52.9885	52.5561	1	53.8009	1	1
CSK	1	1	115.766	126.458	62.9439	117.923	1	146.134	1	55.8229	1	1	1	1	1	1
CSNK2A2	1	43.4693	1	1	1	1	1	1	1	1	35.5104	1	1	1	1	1
CSPG4	97.5656	1	1	1	1	1	1	1	1	1	1	1	1	1	1	1
CSRNP1	130.787	168.649	1	67.218	51.5686	1	1	1	40.1541	1	95.9806	1	1	1	1	80.1561
CSRP2	527.006	76.704	1	1	1	1	1	1	1	1	149.195	50.4841	36.6861	101.024	130.856	26.7834
CST1	1	1	1	1	1	1	1	1	1	1	163.367	429.418	1	1	1	1
CST2	1	1	1	1	1	1	1	1	1	1	64.0074	1	1	1	1	1
CST7	1	1	260.693	245.145	1	1003.45	1	1	1	93.4227	1	1	1	1	1	1
CSTA	1	1	1	276.532	178.087	1	1	1	1	1	1	1	54.8823	1	1	1
CTA.292E10.6	1	1	1	1	1	1	82.4167	1	1	1	1	1	1	1	1	1
CTA.384D8.34	1	1	1	1	1	1	35.8547	1	1	1	1	1	1	1	1	1
CTBS	1	1	1	88.9995	77.9318	1	47.0715	1	38.808	1	38.1529	1	37.8067	34.445	1	36.169
CTC.444N24.11	1	41.2649	1	1	1	1	1	1	42.675	1	1	1	1	40.2919	1	47.796
CTD.2336O2.1	1	1	1	1	35.5119	1	1	1	1	105.898	25.5468	41.8806	42.0903	34.4348	1	29.4102
CTD.3193K9.4	56.3799	1	1	1	1	1	1	1	1	1	1	1	1	1	1	1
CTD.3252C9.4	1	1	1	58.2067	1	129.101	1	1	1	279.377	1	64.7064	1	1	1	1
CTDSPL	47.5137	1	1	1	1	1	1	1	30.0314	1	75.8377	49.1796	1	29.9274	1	24.5109
CTGF	307.549	275.796	1	1	1	1	1	1	1	1	606.987	1124.55	686.083	1047.83	538.817	754.291
CTHRC1	92.0365	79.0683	1	1	1	1	1	1	62.4496	1	677.008	379.289	388.661	2499.64	936.256	877.604
CTLA4	1	1	188.689	1	1	1	1	1	1	1	1	1	1	1	1	1
CTNNAL1	41.4427	120.042	1	1	1	1	1	1	40.9296	1	55.9039	1	42.7505	33.0516	86.0577	84.7438
CTNNBL1	44.735	1	1	37.2716	43.0986	62.2969	1	1	32.6533	180.6	27.4376	39.7389	40.2955	26.5637	1	29.4176
CTR9	1	42.1113	1	1	1	1	1	1	1	72.5543	1	44.8177	1	1	1	1
CTSE	1	1	1	1	1	1	1	1	104.474	1	1	1	1	1	1	1
CTSG	1	1	1	1	1	1	1	1	1	536.173	1	1	1	1	1	1
CTSH	1	84.0267	1	392.988	406.556	1	104.62	326.496	108.26	1	50.5416	69.13	159.68	61.1613	88.8965	47.1678
CTSK	78.6832	1	1	1	1	1	1	1	1	1	250.931	635.78	951.973	1083.64	554.497	273.794
CTSL	114.079	166.816	1	204.439	1259.85	1	1	1	93.8657	1	220.348	147.458	228.177	208.08	133.334	105.759
CTSO	42.8142	37.5722	1	1	1	1	1	1	1	1	71.1456	82.3563	75.7295	52.6026	1	45.4962
CTSS	1	48.4684	108.316	1423.61	1165.96	121.381	168.221	313.891	47.9487	66.3479	1	113.2	41.4265	1	1	1
CTSW	1	1	162.151	1	1	853.78	1	1	1	97.0278	1	1	1	1	1	1
CTTNBP2	1	1	1	1	1	1	1	1	1	85.3179	1	1	1	1	1	1
CTTNBP2NL	1	102.423	1	1	38.5704	1	1	1	1	1	31.2115	1	1	31.8725	1	1
CUL1	1	1	1	1	1	1	1	1	1	1	1	1	27.8372	30.919	1	1
CUL4B	1	1	1	1	1	1	1	1	1	1	1	1	1	1	1	32.38
CUTC	1	1	1	1	1	1	1	1	1	1	1	1	31.0901	1	1	1
CWC22	1	1	1	1	1	1	1	1	1	1	1	1	40.8705	29.8536	1	1
CWC25	50.5048	76.686	1	1	1	61.358	1	1	51.0869	1	36.0698	62.573	1	40.512	1	1
CWC27	42.8852	38.0729	1	1	1	1	1	1	1	1	30.5933	1	1	33.9871	1	25.2054
CWF19L2	55.4383	65.2427	87.7673	1	1	79.8239	1	63.0357	1	66.4616	68.5098	1	46.6921	35.6953	1	1
CX3CL1	1	86.6889	1	1	1	1	1	1	1	1	1	1	1	1	1	1
CXADR	1	1	1	1	1	1	1	1	135.791	1	1	1	1	1	1	54.6891
CXCL1	1	1	1	1	1	1	1	1	1	1	1	672.826	1	1	1	127.154
CXCL10	1	1	1	510.206	1	1	1	1	1	1	1	1	1	1	1	1
CXCL12	80.8619	395.65	1	1	1	1	1	1	1	1	311.377	183.923	1356.97	259.913	406.714	273.399
CXCL13	1	1	1	1	1	1439.5	1	1	1	1	1	1	1	1	1	1
CXCL14	1	1	1	1	1	1	1	1	1	1	361.726	7669.11	1630.81	555.809	693.009	80.7075
CXCL16	1	1	1	198.979	336.448	1	1	1	44.1367	123.099	1	1	1	1	1	1
CXCL2	195.466	514.217	1	319.532	473.831	1	1	1	63.7877	1	311.518	102.323	1	1	1	207.569
CXCL3	1	153.766	1	203.84	434.969	1	1	1	1	1	1	1	1	1	1	1
CXCL6	1	1	1	1	1	1	1	1	1	1	1	1	1	1	1	122.007
CXCL8	1	1	1	1640.83	628.749	1	1	1	1	1	1	1	1	1	1	1
CXCR2	1	1	1	247.973	1	1	1	1	1	1	1	1	1	1	1	1
CXCR3	1	1	152.65	1	1	184.255	1	1	1	1	1	1	1	1	1	1
CXCR4	1	1	1805.47	689.46	485.723	2103.06	268.059	2404.88	1	1	1	171.254	1	1	1	1
CXCR6	1	1	101.616	1	1	220.08	1	1	1	1	1	1	1	1	1	1
CXXC5	44.1958	43.2871	1	1	1	1	43.5358	121.466	80.432	1	34.7205	57.4818	40.9771	36.0631	88.4617	37.6622
CXorf21	1	1	1	44.7648	1	1	1	1	1	1	1	1	1	1	1	1
CXorf36	1	190.624	1	1	1	1	1	1	1	1	1	1	1	1	1	1
CXorf38	1	1	1	39.9293	1	1	1	1	1	1	1	1	1	1	1	1
CYB561	1	1	1	1	1	1	1	1	56.3543	1	1	1	1	37.8931	1	1
CYB561A3	1	1	1	1	1	1	1	140.814	1	1	1	1	31.8624	26.5426	1	29.5722
CYB561D2	1	1	1	1	39.2933	71.5942	31.893	1	1	1	1	1	1	1	1	1
CYB5D2	1	65.617	1	1	1	1	1	1	1	1	1	1	39.1771	1	1	25.409
CYB5R4	1	1	1	80.8342	76.4734	1	1	1	1	1	1	1	1	1	1	1
CYBB	1	1	1	349.162	330.901	1	1	142.884	1	1	1	1	1	1	1	1
CYBRD1	68.6035	1	1	1	1	1	1	1	1	1	118.599	153.074	336.128	147.107	143.64	134.824
CYFIP2	1	1	90.4555	1	1	116.214	1	70.6658	1	1	1	1	1	1	1	1
CYGB	82.8699	1	1	1	1	1	1	1	1	1	189.031	164.031	71.212	1	1	1
CYHR1	58.1613	43.4162	1	1	1	1	36.6659	1	80.8932	1	42.9022	48.0246	56.3268	58.7567	1	38.9693
CYLD	1	1	147.638	79.3278	52.048	106.069	41.7575	1	1	84.9959	1	1	42.5813	31.396	1	32.5336
CYP1B1	1	1	1	1	1	1	1	1	1	1	189.63	1	226.982	213.293	1	195.183
CYP20A1	57.5822	73.03	1	1	1	1	1	1	43.3479	1	55.4763	94.986	85.9328	38.7323	110.997	46.3091
CYP27A1	1	1	1	1	173.247	1	1	1	1	1	1	1	68.7115	1	1	35.2047
CYP3A5	1	1	1	1	1	1	1	1	75.913	1	1	1	1	1	1	1
CYR61	386.057	311.135	1	1	1	1	1	1	124.877	1	716.519	661.036	781.884	532.545	290.372	1050.9
CYSLTR1	1	1	1	1	1	1	1	84.1994	1	69.8415	1	1	1	1	1	1
CYTH1	1	67.071	108.114	77.0535	85.1605	110.767	1	68.5214	30.2027	1	1	1	1	1	1	1
CYTH3	43.0652	1	1	1	1	1	1	1	1	1	49.477	1	1	43.8867	1	1
CYTH4	1	1	1	130.174	78.105	77.1391	1	1	1	1	1	1	1	1	1	1
CYTIP	1	1	464.662	179.953	127.936	451.619	210.428	284.183	1	1	1	1	1	1	1	1
CYTL1	1	1	1	1	1	1	1	1	1	1	1	1	1	1	525.777	1
CYYR1	1	219.095	1	1	1	1	1	1	1	1	1	1	1	1	1	1
DAAM1	47.0375	77.0536	1	1	1	1	1	94.728	80.9839	1	102.6	57.8131	68.5271	49.8419	1	35.9592
DAAM2	65.1395	1	1	1	1	1	1	1	1	1	1	1	1	25.3818	1	1
DAG1	35.9231	1	1	1	1	1	1	1	47.6546	1	25.313	1	1	26.961	1	1
DAPK1	1	1	1	42.0492	58.1739	1	1	1	1	1	1	1	1	1	1	37.1332
DAPP1	1	1	1	97.2774	40.016	1	39.2179	108.911	1	1	1	1	1	1	1	1
DAXX	1	1	1	1	1	64.9736	1	1	1	1	42.4502	1	1	42.2774	1	71.8209
DBN1	1	50.3446	1	1	1	1	1	1	1	1	51.195	1	67.1085	79.7271	117.828	54.511
DCAF10	1	1	1	1	1	1	1	1	30.8527	1	1	51.6591	1	31.7443	1	28.277
DCAF11	1	1	1	1	1	1	1	1	37.0033	1	1	1	1	1	1	1
DCAF12	1	1	1	1	1	1	1	1	1	1	1	1	1	1	1	26.206
DCAF5	1	33.6122	1	1	1	1	1	1	1	1	1	1	1	41.8252	1	25.744
DCAF8	39.8141	42.4188	1	1	1	1	1	1	32.7527	1	1	1	32.6183	1	61.2122	29.8321
DCBLD1	1	1	1	1	1	1	1	1	1	1	55.5757	57.2671	1	44.2286	1	29.2407
DCHS1	1	61.9253	1	1	1	1	1	1	1	1	1	1	1	47.0957	1	1
DCK	1	1	105.245	60.8339	36.7969	83.8885	1	153.412	1	1	1	1	1	1	1	1
DCLK1	1	1	1	1	1	1	1	1	1	1	1	1	123.429	1	1	28.9208
DCN	617.883	1	1	1	1	1	1	1	1	1	3388.29	3076	9828.9	3549.68	3193.24	3061.39
DCP1A	1	48.3394	1	1	1	1	1	1	1	1	1	1	44.7387	1	75.9408	27.42
DCP2	1	1	1	91.4349	61.7742	82.286	1	1	1	1	35.8884	1	1	27.2041	1	1
DCPS	1	1	1	1	1	1	30.3531	1	1	1	1	1	1	1	1	1
DCTN5	1	1	1	1	1	1	1	1	28.6482	1	1	1	1	32.821	68.734	37.3518
DCUN1D1	1	1	1	1	1	1	1	1	45.1754	1	28.6999	1	1	1	63.4933	1
DCUN1D3	1	1	1	1	1	1	1	1	1	1	1	1	1	1	1	27.6303
DDAH1	1	1	1	1	1	1	1	1	53.1248	1	1	1	1	1	1	1
DDB2	1	1	1	1	1	1	1	1	1	1	1	1	1	41.603	1	29.8263
DDHD1	1	1	1	1	1	60.4907	1	1	1	1	1	65.2326	1	1	1	1
DDHD2	1	1	1	1	1	1	1	1	1	1	1	1	1	30.8069	1	1
DDI2	1	1	1	1	1	1	1	1	34.0139	1	1	1	1	1	1	1
DDIT3	63.8958	62.3197	1	1	43.9367	1	1	1	111.002	141.026	128.254	85.9338	76.4592	40.556	1	40.2588
DDR1	1	1	1	1	1	1	1	1	67.4865	1	1	1	1	1	1	1
DDR2	102.131	1	1	1	1	1	1	1	1	1	114.34	141.402	147.13	130.271	176.702	112.43
DDX27	46.952	39.2423	68.4924	47.6345	44.0827	97.0945	1	92.7941	51.069	94.2352	61.3543	1	50.0936	25.2571	1	27.1151
DDX3Y	1	60.8487	1	1	1	1	1	1	1	81.1107	1	1	1	1	1	1
DDX49	1	1	1	1	1	1	1	1	1	1	1	1	1	26.143	1	26.0999
DDX50	46.5095	43.6776	1	1	1	1	1	1	1	1	39.8773	55.1515	59.9276	44.5504	69.7294	41.4212
DDX54	43.8867	1	1	1	1	1	1	1	34.2533	1	1	1	33.9482	27.8778	1	33.5615
DDX56	1	1	1	1	1	1	1	1	33.2313	1	33.0777	45.2405	1	30.4936	1	33.7437
DDX60L	1	1	1	85.5361	80.0492	1	1	1	1	1	1	1	1	1	1	1
DEDD	1	1	1	1	1	1	1	1	1	1	1	1	1	26.7428	1	1
DEDD2	1	1	67.421	49.6219	42.4115	1	1	1	42.3151	1	1	1	1	1	1	1
DEF6	1	1	143.662	57.7424	1	172.499	39.3348	73.6678	1	1	1	1	1	1	1	1
DEF8	51.5905	38.2571	1	41.0604	41.4626	1	60.7334	1	1	1	40.6175	47.8192	1	47.633	1	39.8008
DEFB1	1	1	1	1	1	1	1	1	193.992	1	1	1	1	1	1	1
DENND1B	1	1	1	38.2178	1	1	1	1	1	61.3694	1	1	1	1	1	1
DENND2D	1	1	149.419	1	1	152.138	1	1	1	1	1	1	1	1	1	1
DENND3	1	53.1366	1	144.352	102.157	1	1	1	1	1	1	1	1	1	1	1
DENND4C	1	44.8394	1	1	48.1467	1	1	1	1	1	1	1	46.7963	1	1	1
DENND5A	1	46.9166	1	66.5004	49.6271	1	1	1	1	1	1	1	1	1	1	1
DEPTOR	1	1	1	1	1	1	1	1	1	1	1	1	36.3213	1	1	1
DERL1	43.6625	45.4404	70.2215	52.032	69.0824	98.3458	144.618	66.6765	56.3929	1	56.0034	85.5884	36.9789	61.0889	1	48.8827
DERL3	1	1	1	1	1	1	2071.28	1	1	1	1	1	1	99.1952	1	1
DES	1	1	1	1	1	1	1	1	1	1	1	1	1	1	1	177.959
DESI1	1	1	1	36.583	47.4636	1	36.2664	1	62.7992	1	1	1	1	30.1243	1	1
DEXI	1	1	1	1	1	1	1	1	1	1	1	1	44.4144	36.603	1	46.2327
DGKA	1	1	103.487	1	1	1	1	1	1	1	1	1	1	1	1	1
DGKE	1	63.1228	1	1	1	1	1	1	1	1	1	1	1	1	1	1
DGKH	59.3081	84.8283	1	1	1	1	1	1	1	1	1	1	1	1	1	29.515
DGKZ	1	80.8549	90.9867	63.1998	1	94.582	1	1	1	1	1	1	1	1	1	1
DHCR24	1	1	1	1	1	1	1	1	122.267	1	1	1	1	1	1	1
DHRS1	1	1	1	1	1	1	1	1	1	1	1	1	1	1	1	30.1717
DHRS4	1	1	1	1	1	1	1	1	1	1	1	1	51.3484	1	1	1
DHRS7B	1	57.2726	1	1	1	1	1	1	1	1	30.1246	1	1	1	1	1
DHRS9	1	1	1	1	1	1	1	1	1	88.7518	1	1	1	1	1	1
DIAPH1	1	45.3435	80.5562	86.6006	60.0674	111.165	1	1	44.6294	1	1	1	1	1	1	1
DIAPH2	37.0982	48.9336	1	1	1	1	1	1	1	1	56.604	80.4285	34.1541	1	1	1
DIDO1	1	1	1	1	1	1	1	1	42.3362	1	42.5178	1	1	31.5205	1	1
DIMT1	1	33.3775	1	1	1	1	1	1	1	1	1	1	1	1	1	27.025
DIO2	1	1	1	1	1	1	1	1	1	1	186.833	127.052	1	99.5072	1	1
DIO3OS	1	1	1	1	1	1	1	1	1	1	1	46.2508	91.0959	1	1	1
DIP2A	1	46.1886	1	1	1	80.8918	1	1	45.9559	1	1	1	1	25.3052	1	1
DIP2C	1	1	1	1	1	1	1	1	1	1	1	1	1	50.7719	1	1
DIS3	1	44.5781	1	1	1	1	1	1	1	1	43.8824	1	1	1	1	1
DIXDC1	40.3762	1	1	1	1	1	1	1	1	1	28.1434	1	1	1	1	25.6364
DKC1	1	1	1	1	1	1	1	1	44.3284	1	1	1	1	1	1	25.6062
DKK1	1	1	1	1	1	1	1	1	1	1	1	1	1	1	295.962	1
DKK3	177.893	1	1	1	1	1	1	1	1	1	161.469	181.045	78.3323	179.426	130.416	65.526
DLC1	164.823	190.456	1	1	1	1	1	1	1	64.0539	84.1037	117.051	83.583	47.5466	1	54.9675
DLG1	1	46.4149	1	1	1	1	1	1	56.7252	1	33.7513	60.0182	1	39.0712	82.0273	25.1505
DLL1	1	1	1	1	1	1	1	1	1	1	1	101.126	1	1	1	1
DLL4	1	129.842	1	1	1	1	1	1	1	1	1	1	1	1	1	1
DLST	1	1	1	1	1	1	1	1	28.5269	1	1	1	1	1	1	30.2747
DLX5	1	1	1	1	1	1	1	1	1	1	1	1	1	1	94.6275	1
DMAP1	1	1	1	1	1	1	1	1	1	1	1	1	1	1	1	27.8114
DMD	61.0508	1	1	1	1	1	1	1	1	1	1	48.8784	1	1	1	1
DMKN	1	1	1	1	1	1	1	1	96.9673	1	1	154.748	54.9279	32.8853	82.588	124.782
DMPK	61.3823	1	1	1	1	1	1	1	1	1	1	1	1	1	1	1
DMTF1	1	1	1	1	1	1	1	1	1	1	1	1	1	31.0362	1	1
DMWD	1	33.7083	1	1	1	1	1	1	1	1	1	1	1	1	1	1
DMXL1	1	1	1	1	1	1	1	1	40.8867	1	1	1	1	1	1	1
DMXL2	1	1	1	70.4331	93.6206	1	1	1	1	1	1	1	1	1	1	1
DNAJA4	1	1	1	1	1	1	1	1	51.5954	1	1	1	1	1	1	1
DNAJB11	64.6637	100.031	1	71.0918	57.8378	77.1134	144.905	1	87.6789	1	65.5557	84.1542	68.4812	59.5464	119.432	62.4727
DNAJB4	127.231	92.9836	1	1	1	1	1	1	1	1	171.341	74.5558	50.0046	47.8091	1	93.9795
DNAJB9	66.9947	74.6477	66.2295	1	29.5153	1	282.499	78.4141	69.505	115.257	90.3246	52.0451	57.2822	50.867	85.565	51.3691
DNAJC21	1	50.684	1	1	1	1	1	1	42.2368	55.1698	46.9645	1	1	30.2121	1	1
DNAJC3	81.0039	90.5008	1	80.7041	86.8406	1	153.617	1	76.4729	99.3827	84.5603	96.7589	98.4348	71.0454	71.3115	83.5202
DNAJC30	1	1	1	1	1	1	1	1	1	1	1	1	1	27.3964	1	1
DNAJC5B	1	1	1	1	40.1086	1	1	1	1	1	1	1	1	1	1	1
DNAJC9	1	1	1	1	1	1	1	1	1	50.6413	1	1	1	1	1	1
DNALI1	1	1	1	1	1	1	1	1	1	1	1	1	1	1	1	25.2799
DNASE1L3	1	217.761	1	1	1	1	1	1	1	1	1	1	1	1	1	1
DNASE2	1	1	1	38.5916	142.923	1	64.178	1	39.4471	1	44.4705	69.2896	55.6136	58.0619	1	48.4151
DNM1	1	1	1	1	1	1	1	1	1	1	1	1	38.0136	33.4041	1	1
DNM2	1	40.8604	1	60.1498	66.5841	1	1	1	30.2745	1	1	1	1	1	1	1
DNM3OS	1	1	1	1	1	1	1	1	1	1	48.3251	1	46.5779	79.8573	112.32	1
DNMT1	1	64.4222	93.3136	68.4929	58.2992	106.365	1	1	28.8291	1	1	56.1008	35.8166	31.2788	1	1
DOCK10	1	1	74.2183	66.4831	57.2864	82.1894	1	1	1	1	1	1	1	1	1	1
DOCK2	1	1	1	91.4323	83.0262	1	1	53.9766	1	48.0679	1	1	1	1	1	1
DOCK4	1	66.0139	1	1	49.7529	1	1	1	1	1	1	1	1	1	1	1
DOCK5	1	1	1	102.682	93.6012	1	1	1	1	1	1	1	1	1	1	1
DOCK6	1	116.4	1	1	1	1	1	1	1	1	49.3012	1	1	1	1	1
DOCK8	1	1	194.855	202.82	137.362	194.088	51.3397	144.643	1	1	1	1	1	1	1	1
DOCK9	1	150.32	1	1	1	1	1	1	1	1	1	1	1	1	1	1
DOK1	1	1	1	48.3412	30.9332	1	1	1	1	1	1	1	1	1	1	1
DOK2	1	1	163.772	128.109	117.588	216.522	1	1	1	1	1	1	1	1	1	1
DOK3	1	1	1	73.9508	61.4957	1	1	1	1	1	1	1	1	1	1	1
DOK5	1	1	1	1	1	1	1	1	1	1	1	1	1	1	1	54.9164
DONSON	1	1	1	1	1	1	1	1	1	1	1	1	1	33.0792	1	1
DPCD	1	1	1	1	1	1	1	1	48.4325	1	1	1	1	45.8114	1	44.8861
DPEP2	1	1	1	1	71.1191	1	1	1	1	1	1	1	1	1	1	1
DPM2	1	45.9908	1	1	39.9473	1	41.7624	1	60.6388	1	34.9108	46.1648	43.0427	64.6733	1	55.0142
DPT	1	1	1	1	1	1	1	1	1	1	127.745	118.827	937.314	313.785	185.084	81.3022
DPYD	1	1	1	77.9076	60.0826	1	1	1	1	1	1	1	37.7204	1	1	31.1756
DPYSL3	1	55.0627	1	1	1	1	1	1	1	1	76.1484	70.2598	145.164	234.64	154.091	174.744
DRAM2	41.8249	1	1	94.4852	118.31	1	32.3801	198.101	40.2132	1	28.1106	37.4498	38.6379	31.2374	1	33.9922
DRG1	49.0409	1	1	1	1	1	1	1	38.9453	1	41.1191	1	46.2049	37.1817	65.1026	34.4041
DSC2	1	1	1	1	43.9525	1	1	1	44.0401	1	1	1	1	1	1	40.0774
DSC3	1	1	1	1	1	1	1	1	1	1	1	1	1	1	1	42.2266
DSEL	1	1	1	1	1	1	1	1	1	1	36.4449	52.8358	43.042	40.6882	1	31.6076
DSG2	1	1	1	1	1	1	1	1	112.266	1	1	1	1	41.8919	1	67.0567
DSP	1	1	1	1	1	1	1	1	154.135	1	1	1	1	1	1	30.1053
DST	191.557	136.392	1	1	48.8923	1	1	1	149.269	1	140.18	179.816	172.587	176.674	208.296	135.445
DSTYK	1	1	1	1	1	1	1	1	1	1	1	1	1	1	1	29.5757
DTNBP1	1	1	1	1	36.5906	1	1	1	1	83.0182	1	1	1	1	1	1
DTWD1	64.1243	1	1	1	1	1	1	1	1	1	51.7924	68.0417	94.4144	66.1984	69.1072	68.0744
DTX3	65.5602	1	1	1	1	1	1	1	1	1	46.3808	33.3714	46.684	28.6349	64.6919	33.1641
DUS1L	1	1	1	1	1	1	1	1	51.737	1	1	1	1	1	1	1
DUSP10	1	1	1	1	1	1	1	1	1	95.9874	1	1	1	1	1	1
DUSP14	63.8548	1	1	1	1	1	1	1	1	1	34.6979	1	1	28.7472	1	44.2036
DUSP2	1	1	259.258	160.416	139.264	603.905	120.373	178.926	1	166.803	1	1	1	1	1	1
DUSP22	1	50.6546	1	45.5347	1	1	53.4768	1	1	1	1	1	1	1	1	1
DUSP4	1	1	219.42	1	1	317.053	1	1	81.3062	1	1	1	1	1	1	1
DUSP5	1	100.44	1	1	1	1	54.4928	1	1	1	33.2879	1	1	1	1	36.3228
DUSP6	1	243.156	1	159.404	87.6379	1	1	1	83.114	242.561	35.7697	76.5628	1	1	57.7175	77.5196
DVL3	1	1	1	1	1	1	1	1	1	1	1	1	1	35.1527	1	46.3796
DYM	1	1	1	1	1	1	1	1	1	1	1	1	44.8824	33.7567	1	1
DYNC1I1	1	1	1	1	1	1	1	1	1	1	1	1	1	1	90.7877	1
DYNC2H1	1	1	1	1	1	1	1	1	1	1	1	46.1169	1	1	1	1
DYNC2LI1	1	1	1	1	1	1	1	1	1	1	1	1	40.8032	1	1	24.7473
DYNLL2	1	1	1	1	1	1	1	1	53.949	1	1	1	1	1	1	23.7532
DYRK2	1	1	1	1	1	1	1	1	1	1	49.4559	1	1	41.6854	1	1
DYRK4	1	1	1	1	1	1	1	1	1	1	31.0028	1	1	48.8101	48.3205	33.5463
DYSF	1	81.5177	1	1	1	1	1	1	1	1	1	1	1	1	1	1
DZIP1	1	1	1	1	1	1	1	1	1	1	1	1	1	33.5054	1	1
EAF2	1	1	1	1	1	1	98.3091	59.9554	1	1	1	1	1	1	1	1
EBAG9	1	52.5617	1	1	1	1	52.74	1	50.8691	1	49.2501	41.7201	49.7897	26.8942	1	33.3602
EBF1	185.176	55.3286	1	1	1	1	1	1	1	1	58.9964	1	93.3554	1	1	1
EBLN3	1	1	1	1	1	1	1	94.0391	58.4822	1	1	1	41.3462	51.9704	1	50.6585
EBNA1BP2	58.4849	50.717	1	1	1	1	35.8003	1	69.0587	1	32.4748	1	31.5263	42.8346	1	42.0076
EBP	1	1	1	1	1	1	27.5583	1	67.0719	1	1	1	1	1	1	30.8924
ECE1	96.6206	174.184	1	1	1	1	1	1	35.5668	1	66.3755	56.1023	1	38.0445	1	1
ECHDC1	1	1	1	70.178	58.5784	59.5596	1	69.5784	41.1999	43.3742	39.0139	37.7621	61.3787	50.3599	68.9128	45.3826
ECHDC2	1	1	1	1	1	1	1	1	67.3041	1	53.6752	103.535	91.3192	39.4759	1	55.178
ECI1	1	1	1	1	1	1	1	1	64.9945	1	31.2888	1	1	1	1	1
ECM1	74.776	1	1	1	1	1	1	1	1	1	155.67	184.992	130.581	190.214	93.335	55.5586
ECM2	86.5807	1	1	1	1	1	1	1	1	1	59.4819	1	92.1225	60.939	62.4344	49.7992
ECSCR	1	205.578	1	1	1	1	1	1	1	1	1	1	1	1	1	1
ECSCR.1	1	222.476	1	1	1	1	1	1	1	1	1	1	1	1	1	1
EDEM1	1	1	1	44.2895	40.1185	1	47.1977	1	1	1	1	1	1	1	1	1
EDEM2	1	1	1	1	57.1268	1	50.1765	1	1	71.5547	1	1	1	1	1	1
EDEM3	1	43.5573	1	39.8036	1	1	43.8817	1	66.9572	1	1	39.3602	44.2196	32.7761	1	28.2428
EDIL3	60.9577	1	1	1	1	1	1	1	1	1	74.981	201.068	1	122.09	1	1
EDN1	1	235.758	1	1	1	1	1	1	1	1	1	1	1	1	1	1
EDN3	1	1	1	1	1	1	1	1	1	1	1	1	1	1	159.383	1
EDNRA	153.487	1	1	1	1	1	1	1	1	1	101.931	86.3835	1	73.2359	81.4348	1
EDNRB	78.0168	177.963	1	1	1	1	1	1	1	1	94.6622	266.979	65.1076	1	1	1
EEF1G	51.3358	1	1	1	1	1	1	62.9081	53.5705	1	40.2467	1	1	1	1	1
EFEMP1	1	1	1	1	1	1	1	1	1	1	246.922	90.7477	575.93	139.253	125.839	472.105
EFEMP2	130.285	55.8582	1	1	1	1	1	1	1	1	224.356	242.622	319.58	356.463	170.164	276.734
EFHC1	1	1	1	1	1	1	1	1	32.2904	1	32.3639	58.4808	50.5609	37.0443	1	47.2124
EFHD1	142.544	1	1	1	1	1	1	1	1	1	1	1	1	1	1	1
EFHD2	1	57.4987	1	318.481	253.234	132.264	1	1	93.0851	58.9981	1	1	1	1	1	21.8659
EFNA1	1	196.542	1	1	1	1	1	1	143.521	1	1	1	1	1	1	1
EFNA5	1	1	1	1	1	1	1	1	1	1	1	1	1	1	1	42.8597
EFNB1	1	79.6632	1	1	1	1	1	1	1	1	1	48.1838	1	1	1	37.4993
EFNB2	1	309.533	1	1	1	1	1	1	50.4124	1	1	1	1	1	1	1
EGFL6	140.336	1	1	1	1	1	1	1	1	1	1	1	1	69.0918	1	286.759
EGFL7	1	678.312	1	1	1	1	1	1	1	1	1	1	1	1	1	1
EGFLAM	58.9976	1	1	1	1	1	1	1	1	1	1	1	1	1	1	1
EGFR	1	1	1	1	1	1	1	1	36.7969	1	1	1	75.7526	1	1	46.5242
EGLN3	1	1	1	1	1	1	1	1	1	1	1	50.57	1	41.8394	1	1
EGR2	1	1	1	1	1	1	1	1	1	1	93.5525	1	1	1	1	1
EGR3	1	77.3005	1	1	1	1	1	1	1	91.2874	68.732	1	1	1	1	59.1082
EHBP1	1	1	1	1	1	1	1	1	1	1	1	1	39.6171	1	1	1
EHBP1L1	1	47.1137	1	109.278	89.04	1	1	1	1	1	1	1	1	1	1	1
EHD1	52.6158	1	1	93.4145	1	76.4302	1	65.9121	1	1	1	1	1	29.3272	1	31.0064
EHD2	263.723	105.149	1	1	1	1	1	1	1	1	112.257	71.9043	78.1403	99.1891	1	72.0435
EHD4	1	213.811	1	34.036	45.8777	1	1	1	1	1	1	1	1	21.3245	1	1
EHF	1	1	1	1	1	1	1	1	90.1299	1	1	1	1	1	1	1
EHMT1	1	43.1607	1	1	1	1	64.5975	1	38.3304	1	1	39.9398	41.6027	28.9058	1	1
EIF1AY	1	1	1	1	1	1	39.915	134.171	1	68.6483	1	1	1	1	1	1
EIF2AK3	1	1	1	1	1	1	40.3199	1	1	1	1	1	1	1	1	1
EIF2AK4	41.1295	82.9926	1	1	1	1	54.6438	1	49.0632	1	53.1575	55.1013	45.2944	58.9299	1	42.9479
EIF2B1	40.7807	1	1	1	1	1	1	1	1	1	35.3469	1	1	22.6161	1	29.9669
EIF2B4	1	1	1	1	1	1	1	1	30.7519	1	28.4056	1	1	1	1	1
EIF2B5	1	1	1	1	1	1	1	1	32.1377	1	1	1	1	1	1	1
EIF3J.AS1	1	1	1	1	1	1	1	1	1	1	1	1	38.6068	1	1	1
EIF5AL1	1	1	1	1	1	1	1	1	1	1	38.4273	1	1	1	1	1
ELF3	1	1	1	1	1	1	1	1	548.517	1	1	1	1	1	1	1
ELK1	1	1	1	1	1	1	1	1	1	1	31.165	1	1	34.0491	1	1
ELK3	1	192.323	1	1	1	1	1	1	1	1	42.5236	1	62.6342	44.1247	1	34.3673
ELK4	1	61.1348	1	1	1	1	1	1	70.3906	1	1	1	1	1	1	1
ELL2	46.0699	1	1	1	84.2028	1	130.762	1	57.7776	91.7995	43.325	1	1	1	1	38.0753
ELMO1	1	76.6982	1	43.2614	45.4778	1	1	1	1	55.5338	1	1	1	1	1	1
ELMSAN1	41.5532	50.8938	1	1	1	1	1	1	25.866	46.7613	53.7492	1	1	1	1	45.2383
ELN	76.6555	53.8526	1	1	1	1	1	1	1	1	93.3265	62.3928	274.291	126.74	141.44	114.56
ELP2	1	1	1	1	1	1	1	69.5924	36.1593	1	65.8268	68.4335	56.9788	46.5402	61.4616	46.2813
ELP5	1	1	1	1	1	1	1	1	1	1	35.7163	48.6641	44.1845	33.3352	1	37.0979
ELP6	1	1	1	1	1	1	1	1	1	1	1	1	1	35.1278	1	27.6935
ELTD1	1	165.773	1	1	1	1	1	1	1	1	1	1	1	1	1	1
EMB	1	1	197.464	77.3357	53.5913	234.24	36.243	88.5671	38.8674	1	1	1	1	1	1	1
EMC2	67.0066	1	1	1	1	1	38.5771	1	54.1535	1	42.8658	45.7953	37.8031	33.4626	1	26.2785
EMCN	1	457.551	1	1	1	1	1	1	1	1	1	1	1	1	1	1
EMG1	1	1	1	1	1	1	1	1	43.7643	1	36.9626	1	1	32.3728	1	1
EMID1	1	1	1	1	1	1	1	1	1	1	1	173.977	1	1	1	1
EMILIN1	151.424	1	1	1	1	1	1	1	1	1	354.541	517.008	305.799	358.946	212.891	252.611
EMILIN2	1	1	1	81.156	85.9291	1	1	1	1	1	1	1	1	1	1	29.66
EML3	1	46.1193	1	1	1	1	1	1	1	1	1	1	1	25.7102	1	1
ENAH	135.843	47.1377	1	1	1	1	1	1	76.6875	1	71.7827	120.607	66.7657	171.477	192.073	153.891
ENC1	1	1	1	1	1	1	1	1	31.2743	1	116.006	159.827	45.1127	87.3779	120.757	52.5819
ENDOD1	44.8565	1	1	1	1	1	1	1	43.7463	1	1	1	1	1	1	1
ENDOV	1	1	1	1	1	1	1	1	42.5679	1	1	1	1	1	68.2434	1
ENG	107.215	891.122	1	61.4972	89.5004	1	1	1	1	1	217.896	121.881	138.21	93.8192	136.78	60.0218
ENO2	1	1	1	1	1	1	1	1	1	51.6383	1	1	1	42.8762	1	1
ENOSF1	1	1	1	1	1	1	1	1	31.0692	1	1	1	52.3841	1	1	1
ENPEP	116.425	1	1	1	1	1	1	1	1	1	1	1	1	1	1	1
ENPP2	1	209.155	1	1	1	1	1	1	1	1	1	1	53.8339	1	1	46.8191
ENTPD1	75.8444	190.081	103.62	147.53	60.4806	118.776	1	1	1	1	52.1155	1	1	42.446	1	1
ENTPD5	1	1	1	1	1	1	1	1	62.5212	1	1	1	1	1	1	1
ENTPD6	1	1	1	1	1	1	1	1	43.0339	1	1	1	1	1	1	1
EOMES	1	1	1	1	1	93.2	1	1	1	1	1	1	1	1	1	1
EPAS1	347.16	638.89	1	1	31.7731	1	1	1	1	1	152.453	126.804	59.8868	56.2075	1	29.7426
EPB41	1	1	96.8502	1	1	82.938	1	1	1	1	1	1	1	1	1	1
EPB41L1	55.0716	1	1	1	1	1	1	1	1	1	1	1	1	1	1	1
EPB41L3	1	1	1	56.0973	82.9952	1	1	1	1	1	1	1	1	1	1	1
EPB41L4A	1	43.9522	1	1	1	1	1	1	1	1	1	1	1	1	1	1
EPCAM	1	1	1	1	1	1	1	1	508.415	1	1	1	1	1	1	1
EPDR1	1	1	1	1	1	1	1	1	1	1	1	1	1	43.4504	1	1
EPHA2	1	1	1	1	1	1	1	1	59.643	1	1	1	1	1	1	1
EPHA3	1	1	1	1	1	1	1	1	1	1	53.3536	1	1	1	1	1
EPHA4	1	70.9887	1	1	1	1	1	1	1	1	1	1	1	1	1	1
EPHB4	1	102.702	1	1	1	1	1	1	1	1	1	1	1	1	1	1
EPHB6	1	1	1	1	1	1	1	1	1	1	1	1	1	1	1	44.706
EPHX1	185.431	108.177	1	1	57.4273	1	1	1	72.8917	1	108.728	113.483	290.412	106.162	216.96	93.7253
EPM2AIP1	46.1474	1	1	1	1	1	1	1	33.8839	72.3867	31.7518	69.5021	49.5115	43.6021	58.5262	27.3487
EPN2	62.6356	54.2444	1	1	1	1	1	1	1	1	35.9526	50.2674	1	1	1	29.2397
EPS8	333.006	66.2125	1	1	1	1	1	1	82.2167	1	171.798	118.776	76.8587	46.3887	93.8008	53.0951
EPS8L1	1	1	1	1	1	1	1	1	52.3034	1	1	1	1	1	1	1
EPS8L2	1	1	1	1	1	1	1	1	60.9306	1	1	1	1	1	1	1
EPSTI1	54.3585	1	90.5387	136.305	120.76	135.824	51.4034	104.729	1	1	60.989	62.1897	32.3144	159.44	1	90.7763
ERAP1	1	1	1	1	1	1	1	1	1	1	1	1	1	32.7825	1	1
ERAP2	1	50.9482	95.8475	1	34.5376	73.0277	1	101.062	1	1	1	51.994	49.72	1	1	1
ERBB2	1	1	1	1	1	1	1	1	73.2446	1	1	1	1	1	1	31.4509
ERBB2IP	38.7982	83.1236	73.6398	72.8664	65.7001	72.6394	1	1	47.9634	1	49.4975	50.9228	1	43.0729	1	45.722
ERBB3	1	1	1	1	1	1	1	1	115.44	1	1	1	1	1	1	1
EREG	1	1	1	201.665	1	1	1	1	1	1	1	1	1	1	1	1
ERF	49.7231	52.7948	1	1	1	1	1	1	30.1556	1	55.6385	1	1	1	1	1
ERG	1	127.328	1	1	1	1	1	1	1	1	1	1	1	1	1	1
ERLEC1	99.6022	104.444	1	38.6115	56.1732	77.1778	375.349	1	92.0701	81.8254	133.813	157.525	133.896	149.45	121.757	120.833
ERN1	1	1	1	1	1	76.6045	149.991	1	1	1	32.7052	1	1	1	1	1
ERO1A	1	1	1	70.8498	75.5982	1	1	1	80.733	1	1	1	1	60.8379	1	1
ERO1L	1	1	1	1	86.3174	1	1	1	74.8903	1	1	1	1	1	1	1
ERRFI1	75.6109	1	1	1	1	1	1	1	179.671	1	68.5582	113.459	75.7961	120.852	1	265.446
ERV3.1	1	1	1	1	1	1	1	1	1	1	1	1	1	1	63.739	1
ESAM	141.75	440.427	1	1	1	1	1	1	1	1	1	1	1	1	1	1
ESM1	1	183.519	1	1	1	1	1	1	1	1	1	1	1	1	1	1
ESRP1	1	1	1	1	1	1	1	1	45.2673	1	1	1	1	1	1	1
ESRRA	1	1	1	1	1	1	1	1	35.6131	1	1	1	1	1	1	1
ESYT1	1	45.2402	1	1	30.26	81.3487	1	1	1	85.2193	1	1	1	1	1	1
ETNK1	1	39.2834	1	44.2082	65.5538	1	36.2105	1	70.1345	80.05	25.1377	1	42.195	30.8779	1	38.0201
ETS1	79.8239	225.986	319.239	1	1	328.104	1	91.1415	1	1	65.2147	48.4546	1	34.2588	1	31.0936
ETS2	73.3412	300.207	1	177.369	171.185	1	1	1	56.3861	1	83.5112	195.861	1	1	1	1
ETV1	1	1	1	1	1	1	1	1	1	1	43.9382	73.627	1	79.1177	71.3691	40.7861
ETV5	1	1	1	1	63.4454	1	1	1	1	1	1	1	1	1	1	1
ETV6	1	1	1	70.7385	54.7447	1	1	1	1	1	1	1	1	28.1325	1	1
EVA1A	1	1	1	1	1	1	1	1	1	1	1	1	1	28.8636	1	1
EVA1C	1	57.4095	1	1	1	1	1	1	1	1	1	1	1	1	1	58.6243
EVI2A	1	1	155.48	128.503	129.147	136.707	1	85.6275	1	99.4279	1	1	1	1	1	1
EVI2B	1	1	137.331	372.627	272.052	169.754	105.105	275.153	1	118.556	1	1	1	1	1	1
EVL	45.4832	88.0769	496.143	88.2764	95.2528	767.171	1	232.87	1	1	34.3469	1	51.5455	65.5005	1	39.8556
EXOC3L1	1	37.8644	1	1	1	1	1	1	1	1	1	1	1	1	1	1
EXOC6	1	60.3379	1	1	1	1	1	1	1	1	1	1	1	1	1	1
EXOSC1	38.1756	49.3125	70.1519	40.5555	1	63.0671	38.3577	1	32.8651	1	36.2219	1	1	43.4123	1	37.9025
EXOSC5	1	1	1	1	1	1	1	1	33.7806	1	1	1	1	1	1	1
EXOSC7	1	1	1	1	1	1	1	1	48.7192	1	30.071	1	47.0072	21.7294	1	1
EXOSC8	42.0681	1	1	1	1	1	1	1	1	66.5005	1	34.842	47.8605	28.0343	1	31.3123
EXT1	1	1	1	1	1	1	1	1	1	1	1	49.9065	1	37.9798	1	41.2869
EXTL2	1	1	1	1	1	1	1	1	1	1	1	49.5292	58.2001	49.0036	1	38.6027
EZR	69.7147	44.5071	227.518	124.227	91.2981	274.77	116.871	363.512	266.624	81.3472	63.0215	1	54.841	1	1	171.209
F10	58.9514	1	1	1	1	1	1	1	1	1	58.7431	46.5685	79.4652	1	1	1
F11R	1	60.9721	1	1	1	1	1	1	65.7963	1	1	1	1	1	1	1
F13A1	1	1	1	1	143.731	1	1	1	1	1	1	1	1	45.2403	1	1
F2R	57.8941	126.935	1	1	1	1	1	1	1	1	273.59	396.732	113.573	156.088	121.449	43.1763
F2RL2	1	1	1	1	1	1	1	1	1	1	1	56.3119	1	1	1	1
F2RL3	1	51.2643	1	1	1	1	1	1	1	1	1	1	1	1	1	1
F3	1	1	1	1	1	1	1	1	139.067	1	106.572	753.161	116.105	102.61	106.192	90.3523
F8	1	136.881	1	1	1	1	1	1	1	1	1	1	1	1	1	1
FAAH	1	1	1	1	1	1	1	1	36.449	1	1	1	1	1	1	1
FABP4	313.226	814.605	1	1	1	1	1	1	1	1	1	1	1	1	1	1
FADS1	1	1	1	1	1	1	1	1	1	1	41.1822	38.663	1	23.2715	1	1
FADS3	83.802	1	1	1	1	1	1	77.2149	1	1	52.09	1	1	1	1	1
FAH	1	1	1	1	34.1028	1	1	1	1	1	1	1	1	1	1	48.3379
FAM101B	1	80.9529	1	1	1	1	1	1	1	1	1	41.8521	1	28.8741	1	1
FAM102A	1	1	99.3735	1	1	98.614	1	1	40.8115	1	1	1	1	1	1	1
FAM103A1	1	1	1	34.2166	44.595	1	1	1	39.1317	50.2095	1	1	40.7596	27.5392	1	35.0761
FAM104A	1	1	1	1	1	74.3188	1	1	31.656	1	1	1	1	24.9366	1	22.2862
FAM104B	1	1	1	1	1	1	1	1	35.4713	70.7714	1	1	1	28.6341	1	30.6028
FAM105A	1	1	1	66.637	59.3028	1	1	1	1	1	1	94.1164	1	1	1	1
FAM107A	1	168.149	1	1	1	1	1	1	1	1	1	1	1	1	1	1
FAM107B	58.1498	1	164.065	93.6449	66.9264	132.694	86.9343	86.958	79.8886	97.9869	53.8599	1	1	1	1	31.7104
FAM109B	1	1	1	1	1	1	1	1	1	1	1	1	1	29.6513	1	1
FAM110B	1	1	1	1	1	1	1	1	1	1	1	1	1	1	1	34.4475
FAM110D	1	58.1136	1	1	1	1	1	1	1	1	1	1	1	1	1	1
FAM111A	1	1	1	46.764	1	1	1	1	44.8821	1	1	1	1	1	1	1
FAM115A	1	1	1	1	1	1	1	1	1	1	37.6771	1	1	1	1	1
FAM118A	63.7892	72.6627	1	1	1	1	1	1	1	1	79.9594	53.9843	1	1	1	1
FAM122A	40.7412	1	1	1	1	1	1	1	1	1	1	1	1	1	1	1
FAM126A	1	1	1	1	1	1	1	1	1	1	1	1	1	1	1	35.6718
FAM126B	1	1	1	88.9591	60.4647	1	1	1	1	1	1	1	1	1	1	1
FAM127C	1	1	1	1	1	1	1	1	1	1	1	1	1	48.2825	1	1
FAM129A	97.5161	1	120.707	223.434	192.008	117.67	1	1	56.2243	1	1	1	1	1	1	1
FAM129B	1	75.0957	1	1	1	1	1	1	58.8798	59.3004	48.7122	1	1	47.8374	1	1
FAM129C	1	1	1	1	1	1	1	102.283	1	1	1	1	1	1	1	1
FAM134C	1	1	1	1	1	1	1	1	1	1	1	1	1	37.63	1	1
FAM136A	1	1	1	1	33.5054	1	46.0933	1	65.7078	1	47.0208	1	1	37.2801	1	33.9693
FAM13A	1	1	1	1	1	1	1	1	1	1	32.554	1	56.2201	1	1	1
FAM13C	114.149	1	1	1	1	1	1	1	1	1	48.3118	1	1	1	1	1
FAM150B	1	1	1	1	1	1	1	1	1	1	1	83.3196	1	1	1	1
FAM162B	132.348	1	1	1	1	1	1	1	1	1	1	1	1	1	1	1
FAM167B	1	290.667	1	1	1	1	1	1	1	1	1	1	1	1	1	1
FAM168A	1	1	1	1	1	1	1	1	1	1	1	1	1	28.6524	1	1
FAM171A1	1	57.5115	1	1	1	1	1	1	1	1	1	1	1	1	1	1
FAM174A	1	47.0208	1	1	1	1	52.8407	1	36.8095	1	1	1	1	31.5304	1	1
FAM174B	1	1	1	1	1	1	1	1	35.0534	1	1	1	1	1	1	1
FAM179B	1	1	1	1	1	1	1	1	1	1	1	1	1	26.8919	1	1
FAM195A	1	1	1	1	71.773	1	1	1	84.6322	1	1	1	1	1	1	36.116
FAM208B	1	1	1	1	1	1	1	1	1	1	41.174	49.0615	1	31.9162	1	31.967
FAM20A	1	1	1	1	1	1	1	1	1	1	1	1	80.1301	50.5033	1	63.4172
FAM20B	1	1	1	1	1	1	1	1	1	1	1	1	1	1	1	23.8423
FAM20C	1	1	1	1	63.2797	1	1	1	1	1	70.0647	70.3557	42.9707	61.9469	1	1
FAM212A	1	1	1	1	1	1	1	1	1	85.5468	1	1	1	1	1	1
FAM213A	95.7893	101.401	1	1	51.9973	1	1	1	127.604	1	94.105	65.362	40.8257	1	99.7406	33.6592
FAM214A	1	1	1	1	1	1	37.3857	1	1	1	1	1	1	1	1	1
FAM229B	37.1902	1	1	1	1	1	1	1	1	1	42.3285	57.6674	58.3083	58.4684	111.003	57.4378
FAM234A	1	1	1	1	1	1	1	1	1	1	1	1	1	37.2325	1	22.2957
FAM26F	1	1	1	325.617	193.32	1	1	1	1	1	1	1	1	1	1	1
FAM3B	1	1	1	1	1	1	1	1	98.0763	1	1	1	1	1	1	1
FAM43A	1	104.471	1	1	1	1	1	1	1	1	1	1	1	1	1	1
FAM46A	93.0057	1	1	90.8825	60.3103	1	1	1	1	190.21	100.465	166.493	126.607	55.6429	120.583	107.029
FAM46C	1	1	1	1	1	77.272	245.074	1	1	1	1	1	1	1	1	1
FAM49A	1	1	1	96.39	79.8418	1	1	1	1	1	1	1	1	1	1	1
FAM49B	1	1	204.776	372.866	299.319	227.631	39.513	182.685	66.8203	102.342	1	1	1	1	1	24.7423
FAM53C	44.8977	56.4747	1	81.4633	53.2661	81.4548	1	1	43.346	133.344	60.8884	1	1	1	1	27.2213
FAM60A	1	44.0344	1	37.0189	1	1	1	88.3101	65.1202	1	1	1	1	1	1	1
FAM65A	1	87.7866	1	1	1	1	1	1	1	1	1	1	1	25.4531	1	24.0532
FAM65B	1	1	126.377	295.913	178.703	86.1106	1	229.013	1	1	1	1	1	1	1	1
FAM69B	1	48.0819	1	1	1	1	1	1	1	1	1	1	1	1	1	1
FAM73A	1	1	1	1	1	1	1	1	35.8689	1	1	1	1	1	1	1
FAM83H	1	1	1	1	1	1	1	1	36.8855	1	1	1	1	1	1	1
FAM84A	1	1	1	1	1	1	1	1	70.8514	1	1	1	1	1	1	1
FAM84B	1	1	1	1	1	1	1	1	46.5851	1	1	1	1	1	1	1
FAM89B	39.7397	37.8862	1	49.4212	1	1	44.2509	1	42.974	1	49.4136	1	1	45.7617	1	1
FAM92A1	1	1	1	1	1	1	1	1	1	1	52.9844	60.9961	48.7542	34.575	1	29.639
FAM92B	1	1	1	1	1	1	63.1217	1	1	1	1	1	1	1	1	1
FAM96A	1	49.9539	1	112.595	108.639	79.6129	49.2421	96.7403	68.2272	64.4654	1	1	38.8246	28.5967	1	29.9924
FAM98A	1	1	1	1	1	1	1	1	1	1	1	1	1	37.5592	1	26.2222
FAP	1	1	1	1	1	1	1	1	1	1	113.563	1	116.695	268.096	154.802	120.603
FARP1	75.4346	1	1	1	1	1	1	1	48.7148	1	59.4807	126.861	1	78.9123	1	32.5694
FASLG	1	1	1	1	1	103.555	1	1	1	1	1	1	1	1	1	1
FASN	1	1	1	1	1	1	1	1	133.148	1	1	1	1	1	1	1
FASTK	51.4858	1	1	1	1	1	49.3893	1	58.1246	1	48.8423	1	52.4253	64.4672	46.9432	48.3346
FAT1	86.9143	1	1	1	1	1	1	1	41.3944	1	59.0654	64.9168	1	95.7794	1	51.8067
FAT4	1	1	1	1	1	1	1	1	1	1	1	49.041	1	1	1	1
FBLIM1	155.834	63.7153	1	1	1	1	1	1	1	1	114.154	137.296	35.9312	85.4999	1	55.5199
FBLN1	53.3896	1	1	1	1	1	1	1	1	1	481.794	567.488	1736.7	621.393	436.033	643.711
FBLN2	1	168.276	1	1	1	1	1	1	1	1	85.3675	56.4226	336.527	304.674	158.04	90.7767
FBLN5	1	1	1	1	1	1	1	1	1	1	97.8765	126.438	336.777	101.956	94.3163	43.2007
FBLN7	1	1	1	1	1	1	1	1	1	1	1	1	59.1519	1	1	1
FBN1	80.5038	96.5681	1	1	1	1	1	1	1	1	190.847	176.433	359.61	529.009	202.268	114.222
FBP1	1	1	1	254.87	350.858	1	1	1	48.3781	84.0485	1	1	1	1	1	1
FBXL15	1	48.4075	1	50.9393	54.241	1	27.9982	1	41.1289	56.9643	1	1	41.941	37.8584	1	34.6749
FBXL3	45.5589	1	1	1	1	1	1	1	1	1	1	1	34.9148	41.1892	1	1
FBXO17	1	1	1	1	1	1	1	1	1	1	37.4992	1	60.5043	24.0371	1	35.7283
FBXO18	40.9411	1	1	1	1	1	36.6462	1	1	1	29.6533	60.8217	28.7048	39.0027	1	35.8707
FBXO25	1	1	1	1	1	1	1	1	90.2808	1	1	47.9443	1	28.6364	1	20.7366
FBXO32	144.437	1	1	1	1	1	1	1	93.5304	1	98.2541	58.0549	40.8944	172.44	143.1	152.245
FBXO34	1	1	1	1	1	1	1	1	1	59.5396	1	1	1	1	1	1
FBXO8	1	1	1	1	1	1	1	1	1	1	26.7524	1	1	1	1	1
FBXW11	44.4294	1	1	1	1	1	1	1	30.9776	1	30.1027	1	1	29.9048	1	30.8965
FBXW2	1	1	1	1	1	1	1	1	1	1	31.0988	1	29.4495	50.5209	1	24.6625
FBXW7	1	48.5891	1	1	1	1	99.7392	1	1	1	1	1	1	1	1	20.9905
FCER1A	1	1	1	146.724	1	1	1	1	1	152.452	1	1	1	1	1	1
FCER1G	1	1	1	1753.04	2300.39	178.829	1	1	1	1181.42	1	1	1	1	1	1
FCER2	1	1	1	1	1	1	1	121.47	1	1	1	1	1	1	1	1
FCGR1A	1	1	1	112.075	184.2	1	1	1	1	1	1	1	1	1	1	1
FCGR1B	1	1	1	1	44.7919	1	1	1	1	1	1	1	1	1	1	1
FCGR2A	1	1	1	419.259	522.362	1	1	1	1	1	1	1	1	1	1	1
FCGR2B	1	1	1	136.249	217.652	1	57.6455	89.626	1	1	1	1	1	1	1	1
FCGR3A	1	1	1	304.252	632.175	1	1	1	1	1	1	1	1	1	1	1
FCGR3B	1	1	1	513.725	261.988	1	1	1	1	1	1	1	1	1	1	1
FCHO2	1	52.551	1	1	80.982	1	1	1	1	1	1	1	1	1	1	1
FCHSD2	1	44.73	1	1	1	1	35.2072	67.3856	1	1	1	1	1	1	1	1
FCMR	1	1	122.973	1	1	1	1	200.198	1	1	1	1	1	1	1	1
FCN1	1	1	1	599.27	95.2178	1	1	1	1	1	1	1	1	1	1	1
FCN3	1	455.555	1	1	1	1	1	1	1	1	1	1	1	1	1	1
FCRL1	1	1	1	1	1	1	1	71.4056	1	1	1	1	1	1	1	1
FCRL2	1	1	1	1	1	1	1	93.5717	1	1	1	1	1	1	1	1
FCRL5	1	1	1	1	1	1	255.344	99.7522	1	1	1	1	1	1	1	1
FCRLA	1	1	1	1	1	1	1	187.645	1	1	1	1	1	1	1	1
FDX1L	1	1	1	1	1	1	1	1	1	1	1	1	1	1	1	23.2677
FDXR	1	1	1	1	1	1	1	1	1	1	1	1	1	1	1	33.474
FENDRR	1	1	1	1	1	1	1	1	1	1	1	108.59	1	1	1	1
FER	1	1	1	1	1	1	1	1	1	98.1674	1	1	1	1	1	1
FERMT2	149.221	116.546	1	1	1	1	1	1	1	102.856	155.986	130.155	79.9636	92.7052	67.4114	78.0952
FERMT3	1	1	101.569	154.632	160.67	127.179	1	94.5945	1	80.7195	1	1	1	1	1	1
FES	1	43.1345	1	68.1588	55.0185	1	1	1	1	1	1	1	1	1	1	1
FGD2	1	1	1	56.8451	43.4107	1	1	70.5461	1	1	1	1	1	1	1	1
FGD3	1	1	78.2166	1	1	1	1	1	1	1	1	1	1	1	1	1
FGD4	43.5196	1	1	97.2589	81.103	1	1	1	1	1	1	1	1	1	1	1
FGD5	1	74.4834	1	1	1	1	1	1	1	1	1	1	1	1	1	1
FGF7	1	1	1	1	1	1	1	1	1	1	148.493	111.26	470.977	99.2334	1	122.355
FGFBP2	1	1	1	1	1	185.669	1	1	1	1	1	1	1	1	1	1
FGFR1	59.8263	74.9986	1	1	1	1	1	1	1	1	144.188	173.977	178.125	153.887	118.861	109.379
FGL2	1	1	1	436.142	209.246	1	1	1	1	77.2334	1	1	77.9735	1	1	1
FGR	1	1	1	196.647	121.83	1	1	1	1	1	1	1	1	1	1	1
FHL1	188.819	1	1	1	1	1	1	1	1	1	148.071	159.869	195.779	46.8159	102.488	55.5743
FHL2	144.716	1	1	1	1	1	1	1	82.6611	1	296.045	465.629	271.084	174.244	241.757	111.84
FHL3	60.0403	1	1	1	1	1	1	1	1	71.2258	54.0359	1	40.0792	70.2957	1	60.5209
FHL5	65.9126	1	1	1	1	1	1	1	1	1	1	1	1	1	1	1
FIBIN	1	1	1	1	1	1	1	1	1	1	1	127.674	115.137	145.962	86.9695	64.1653
FILIP1	186.13	136.662	1	1	1	1	1	1	1	1	53.1533	1	1	1	1	1
FILIP1L	384.218	74.1445	1	1	1	1	1	1	1	1	344.136	452.212	112.969	235.033	62.8181	128.884
FIP1L1	1	35.8189	62.6209	40.993	1	1	1	60.2383	36.4617	1	48.1034	74.2758	45.779	24.593	1	30.6551
FKBP10	135.848	51.9971	1	1	1	1	1	1	1	1	154.062	215.149	160.905	273.578	162.64	169.868
FKBP11	36.9347	54.9568	133.529	1	1	169.13	1169.52	1	44.6193	1	74.3224	88.3908	87.9704	125.049	97.2436	147.674
FKBP14	1	1	1	1	1	1	1	1	1	1	45.3752	48.5889	54.8977	64.1335	70.4224	46.6391
FKBP15	1	1	1	49.8735	78.3646	1	1	1	1	1	1	1	1	1	1	1
FKBP2	206.709	227.761	108.942	138.033	145.156	127.335	961.735	102.052	297.607	198.694	249.585	250.005	268.998	197.437	179.475	227.916
FKBP7	36.8855	1	1	1	1	1	1	1	1	1	86.3196	80.0872	111.919	109.633	61.0507	59.9834
FKBP9	50.2172	110.423	1	1	1	1	1	1	34.0628	1	72.2285	63.6238	106.924	162.086	124.736	79.4796
FLCN	1	1	1	1	1	1	1	1	1	1	55.6685	1	1	1	1	25.6485
FLI1	1	96.7003	1	64.8213	41.5236	81.0866	1	70.2303	1	1	1	1	1	1	1	1
FLNB	1	138.364	1	1	1	1	1	1	141.257	63.5114	1	1	39.7248	56.2281	1	31.5826
FLNC	1	1	1	1	1	1	1	1	1	1	1	1	1	1	1	56.0346
FLOT2	1	51.9341	66.5169	104.679	76.3595	1	1	60.341	32.286	1	1	1	1	1	1	1
FLRT2	1	1	1	1	1	1	1	1	1	1	1	1	75.2857	30.9525	1	99.9367
FLT1	1	468.659	1	1	1	1	1	1	1	1	1	1	1	1	1	1
FLT3LG	1	1	118.271	1	1	74.1981	1	1	1	1	1	1	1	1	1	1
FLT4	1	58.2439	1	1	1	1	1	1	1	1	1	1	1	1	1	1
FMNL1	1	1	126.809	241.337	155.406	107.132	1	61.0394	1	1	1	1	1	1	1	1
FMNL2	1	1	1	1	55.3473	1	1	1	1	1	1	1	1	1	1	1
FMNL3	1	61.2458	1	1	1	1	1	1	1	1	1	1	1	1	1	1
FMO1	1	1	1	1	1	1	1	1	1	1	1	1	69.1179	34.4746	1	1
FMO2	1	1	1	1	1	1	1	1	1	1	75.6616	1	96.323	1	1	1
FMOD	68.2356	1	1	1	1	1	1	1	1	1	141.736	57.3044	146.402	128.427	128.516	100.112
FN1	1295.43	378.785	1	294.606	505.722	1	1	1	169.96	1	1055.15	549.605	731.982	7274.16	2972.64	1436.23
FNBP1	45.784	42.2064	195.297	123.082	100.137	240.305	69.9886	223.39	30.5958	77.3173	44.5263	49.354	49.7912	44.0551	1	1
FNBP1L	1	70.1171	1	1	1	1	1	1	61.6578	1	1	1	1	26.9841	1	27.4278
FNDC1	1	1	1	1	1	1	1	1	1	1	40.8961	1	50.2746	203.205	1	73.0527
FNDC3A	44.817	63.6991	1	39.6149	65.272	1	99.1777	1	1	1	63.1121	79.0112	76.4756	53.1393	61.0048	32.3777
FNDC4	1	1	1	1	1	1	1	1	1	1	1	1	1	1	1	33.5231
FNIP1	1	1	1	50.7988	63.5621	1	1	72.724	49.7645	1	51.4028	83.2519	82.8649	55.8302	57.8814	44.1295
FO538757.2	1	1	1	1	1	1	1	1	1	1	1	1	35.447	1	1	1
FOLH1	1	1	1	1	1	1	1	1	137.716	1	1	1	1	1	1	1
FOLR2	1	1	1	1	186.283	1	1	1	1	1	1	1	1	1	1	1
FOPNL	1	1	1	1	1	1	1	1	1	1	1	1	41.1999	1	1	1
FOSL1	1	1	1	1	1	1	1	1	1	1	1	1	1	1	1	33.7693
FOXA1	1	1	1	1	1	1	1	1	90.4507	1	1	1	1	1	1	1
FOXC1	1	64.5703	1	1	1	1	1	1	1	1	1	1	1	1	1	1
FOXF1	1	1	1	1	1	1	1	1	1	1	34.1916	151.402	1	1	1	1
FOXF2	1	1	1	1	1	1	1	1	1	1	1	71.9464	1	1	1	1
FOXK1	1	1	1	1	1	1	1	1	31.9656	1	1	1	1	29.6191	1	33.3643
FOXN2	1	1	1	65.3208	39.1654	1	1	1	1	1	1	1	1	1	1	1
FOXS1	128.257	1	1	1	1	1	1	1	1	1	52.0491	1	1	1	1	1
FPGS	1	1	1	1	1	1	1	1	1	1	1	1	34.3827	1	1	37.841
FPR1	1	1	1	459.875	317.15	1	1	1	1	1	1	1	1	1	1	1
FPR2	1	1	1	113.445	1	1	1	1	1	1	1	1	1	1	1	1
FPR3	1	1	1	92.2998	176.416	1	1	1	1	1	1	1	1	1	1	1
FRA10AC1	47.0211	48.6322	1	1	1	1	1	1	33.0866	1	50.8274	49.8975	50.2283	41.3082	124.837	38.9597
FRAT2	1	1	1	80.3969	1	1	1	1	1	1	1	1	1	1	1	1
FRMD4A	55.1417	69.641	1	1	53.4538	1	1	1	1	1	1	1	1	1	1	1
FRMD4B	1	109.9	1	68.4079	78.0295	1	1	1	48.2695	1	1	1	1	1	1	1
FRMD6	1	1	1	1	1	1	1	1	1	1	69.7699	68.4666	88.2944	133.088	1	42.984
FRMD8	1	53.3922	1	1	1	1	1	1	1	1	1	1	1	1	1	1
FRS2	1	1	1	1	1	1	1	1	1	1	1	1	1	1	1	22.7829
FRY	59.0985	86.5485	1	1	1	1	1	1	1	1	39.7143	57.0391	1	1	1	1
FRYL	1	108.665	63.9381	36.5222	1	1	1	1	48.3985	1	1	1	1	1	1	1
FRZB	515.692	1	1	1	1	1	1	1	1	1	128.646	167.698	175.428	86.0111	164.402	1
FSCN1	1	144.539	1	1	1	1	1	1	57.1526	1	52.3286	60.3144	59.7585	135.703	115.322	113.314
FSTL1	242.955	146.382	1	1	1	1	1	1	51.4948	1	311.329	413.296	556.887	600.112	412.091	318.287
FSTL3	45.2338	1	1	1	1	1	1	1	1	1	59.8716	1	51.9856	90.2564	1	63.2169
FTO	1	1	1	1	1	1	1	1	1	1	1	1	1	32.312	1	1
FTSJ1	1	1	1	1	1	1	1	1	1	1	1	1	1	32.126	1	25.2413
FUCA1	1	1	1	1	127.019	1	1	1	40.3352	1	1	1	1	1	1	1
FUOM	1	1	1	60.1997	90.0466	1	38.3788	1	1	1	1	1	1	1	1	1
FUT11	1	43.9169	1	1	1	1	1	1	1	1	1	38.2128	1	35.4602	1	24.4312
FUT8	1	1	1	1	1	1	64.9707	1	1	1	1	1	34.9888	25.299	1	1
FXYD1	209.194	1	1	1	1	1	1	1	1	1	135.685	104.832	398.612	1	111.541	75.5503
FXYD3	1	1	1	1	1	1	1	1	929.417	159.395	1	1	1	1	1	1
FXYD6	186.017	112.549	1	1	1	1	1	1	1	1	120.431	86.8393	100.769	73.6199	120.996	1
FYB	1	1	507.221	466.924	408.134	440.638	1	1	1	1	1	1	1	1	1	1
FYN	1	107.83	238.958	42.6071	1	296.768	1	1	1	55.5757	41.1802	1	40.6729	37.0754	1	35.158
FZD1	1	1	1	1	1	1	1	1	1	1	1	47.631	1	87.5618	1	34.0801
FZD4	1	100.455	1	1	1	1	1	1	1	1	1	1	44.5765	1	1	1
FZD6	1	55.6357	1	1	1	1	1	1	1	1	1	1	1	1	1	1
FZD7	1	1	1	1	1	1	1	1	1	1	1	1	45.3527	36.6745	1	34.3983
G0S2	1	1	1	1120.46	712.077	1	1	1	1	1	160.455	110.314	73.7372	1	1	99.1179
G6PD	1	1	1	67.9192	50.1195	1	1	1	45.8976	1	1	1	1	1	1	1
GABBR1	1	1	1	1	1	1	1	1	1	1	1	1	1	37.8323	1	1
GABPB1	1	45.4755	119.341	1	1	136.734	1	79.6479	28.8239	68.4467	1	54.2713	41.2629	50.7992	1	34.9467
GABPB1.AS1	1	1	148.882	1	1	149.71	1	169.227	81.2851	1	1	78.122	39.5545	51.4697	132.022	59.4216
GADD45A	133.973	115.313	1	1	1	1	104.782	1	81.6773	72.1612	226.675	173.814	85.1241	70.1044	1	145.088
GADD45G	1	1	1	1	68.6179	1	1	1	52.0375	1	55.8399	279.224	1	1	1	1
GAL3ST4	1	1	1	1	44.5407	1	1	1	1	1	1	1	1	1	1	1
GALC	1	1	1	1	51.8481	1	1	1	1	201.75	1	1	1	1	1	1
GALE	1	1	1	1	1	1	1	1	56.5218	1	1	1	1	1	1	1
GALM	1	1	94.616	51.7429	50.3429	102.43	1	1	1	1	1	1	1	1	1	24.2226
GALNS	1	1	1	1	1	1	1	1	1	1	1	1	1	40.953	1	1
GALNT10	1	1	1	1	1	1	1	1	1	1	1	1	1	51.2539	1	1
GALNT15	1	1	1	1	1	1	1	1	1	1	1	1	1	1	1	26.706
GALNT18	1	67.9676	1	1	1	1	1	1	1	1	1	1	1	1	1	39.6894
GALNT2	50.6129	1	1	1	1	1	34.6849	1	39.5945	1	45.8556	53.4683	55.3503	59.6039	1	45.8875
GALNT3	1	1	1	1	1	1	1	1	69.864	1	1	1	1	1	1	1
GALNT5	1	1	1	1	1	1	1	1	1	1	1	1	1	29.5597	1	1
GALNT6	1	1	1	1	1	1	1	1	1	92.6715	1	1	1	1	1	1
GALNT7	1	1	1	1	1	1	1	1	50.3829	1	1	1	1	1	1	1
GAMT	81.9707	1	1	1	1	1	1	1	50.5596	1	47.0728	1	1	30.1841	1	24.8886
GAPT	1	1	1	91.8605	1	1	1	135.459	1	67.6792	1	1	1	1	1	1
GAPVD1	1	1	1	1	1	1	1	1	1	1	1	1	1	1	1	25.5612
GAR1	1	1	1	1	1	1	1	1	38.2231	1	1	50.0927	54.4682	30.9346	1	34.0678
GARS	52.8104	1	1	1	1	1	41.7709	1	54.0736	1	57.635	53.1505	52.5477	76.326	83.5495	53.4858
GAS1	1	1	1	1	1	1	1	1	1	1	1	1	129.694	115.026	1	259.633
GAS2L1	1	59.0866	1	1	1	1	1	1	1	1	1	1	1	1	1	1
GAS6	161.193	146.5	1	1	1	1	79.1946	1	1	1	178.481	1	229.984	147.406	133.895	93.2242
GATA1	1	1	1	1	1	1	1	1	1	59.4141	1	1	1	1	1	1
GATA2	1	62.1103	1	1	1	1	1	1	1	1053.26	1	1	1	1	1	1
GATA3	1	1	129.713	1	1	112.697	1	1	1	1	1	1	1	1	1	1
GATA6	1	1	1	1	1	1	1	1	1	1	1	1	1	1	1	83.9639
GATAD1	1	51.9071	1	1	1	1	1	1	48.3676	76.1959	43.1469	59.2163	1	29.4028	1	30.9782
GATAD2B	1	44.5426	1	43.7738	1	1	1	1	1	1	1	1	1	1	52.7975	1
GATM	1	1	1	1	38.9656	1	1	1	1	1	1	1	1	1	1	1
GBA	1	1	1	1	49.4169	1	1	1	1	1	1	1	1	1	1	1
GBE1	1	1	1	1	1	1	1	1	1	52.2586	1	1	1	33.2915	1	1
GBP2	121.412	66.8035	187.066	166.68	115.047	166.574	1	1	1	1	82.7306	86.1323	68.7216	69.2358	1	83.6695
GBP3	1	1	1	1	1	1	1	1	1	1	1	1	1	52.1775	1	27.2166
GBP4	1	111.175	1	77.0663	51.9396	1	1	1	1	1	33.6801	51.3561	1	1	1	1
GBP5	1	1	159.056	149.757	128.764	148.921	1	1	1	1	1	1	1	1	1	1
GCA	1	1	1	437.193	240.504	1	1	72.1911	39.923	1	1	1	1	1	1	1
GCHFR	1	1	87.7079	1	294.684	111.816	1	1	65.6831	58.6418	1	1	1	1	1	1
GCLC	1	1	1	1	1	1	1	1	42.8051	1	1	55.561	1	1	1	1
GCLM	1	1	1	1	1	1	1	1	43.1175	1	1	1	1	1	1	1
GCSAML	1	1	1	1	1	1	1	1	1	152.543	1	1	1	1	1	1
GDF15	1	1	1	1	1	1	1	1	317.096	108.533	55.8545	204.789	1	1	1	1
GEM	365.394	1	1	1	1	1	1	1	1	1	391.075	204.744	203.15	98.8958	1	163.198
GFER	1	1	1	1	1	1	37.9391	1	56.3177	1	40.6936	1	1	26.8037	1	25.5307
GFOD1	1	104.644	1	1	1	1	1	1	1	1	1	1	1	1	1	1
GFOD2	1	64.2251	1	1	1	1	1	1	1	1	1	1	1	1	1	1
GFPT2	1	1	1	1	1	1	1	1	1	1	37.7907	1	62.5483	36.8786	1	47.985
GFRA1	1	1	1	1	1	1	1	1	1	1	1	1	55.0252	1	1	1
GGA1	1	37.957	1	39.728	64.409	76.4648	1	1	55.3554	1	1	1	1	26.6666	43.7211	1
GGA2	1	1	1	46.5047	55.8166	1	1	148.124	1	1	1	1	1	1	1	1
GGCX	1	1	1	1	1	1	1	1	34.1944	1	45.7141	1	1	47.9054	1	1
GGH	1	1	1	1	1	1	47.0793	1	1	1	1	1	1	1	1	1
GGPS1	46.3665	46.0274	1	1	1	1	1	1	65.6667	1	43.0563	54.4097	1	38.3177	74.8769	48.8631
GGT5	171.123	1	1	1	1	1	1	1	1	1	327.132	188.673	157.785	141.987	1	41.1657
GID8	1	37.0711	1	41.4596	49.0571	95.6339	1	1	81.7442	1	57.0358	1	53.7108	48.4404	1	36.6921
GIGYF2	1	38.4254	1	1	1	1	1	1	37.001	1	42.1011	43.7993	1	1	1	1
GIMAP1	1	144.699	126.961	53.0043	1	134.663	1	1	1	1	1	1	1	1	1	1
GIMAP2	1	1	100.824	1	1	98.9338	1	1	1	1	1	1	1	1	1	1
GIMAP4	1	308.12	285.737	143.345	148.931	358.316	1	1	1	1	1	1	1	1	1	1
GIMAP5	1	53.3301	1	1	1	1	1	1	1	1	1	1	1	1	1	1
GIMAP6	1	121.982	67.5359	1	1	84.5709	1	1	1	1	1	1	1	1	1	1
GIMAP7	1	451.719	408.064	83.1263	57.6188	432.391	1	1	1	1	1	1	1	1	1	1
GIMAP8	1	100.654	1	1	1	1	1	1	1	1	1	1	1	1	1	1
GIT1	1	56.8586	1	1	1	1	1	1	1	1	1	1	1	1	1	1
GJA1	1	165.887	1	1	1	1	1	1	1	1	56.4518	239.306	60.5897	262.456	169.611	153.058
GJA4	341.795	283.909	1	1	1	1	1	1	1	1	91.8253	1	1	1	1	1
GJA5	1	101.84	1	1	1	1	1	1	1	1	1	1	1	1	1	1
GJB2	1	1	1	1	1	1	1	1	1	1	1	1	1	210.42	1	65.0255
GJC1	169.127	1	1	1	1	1	1	1	1	1	1	1	1	1	1	1
GK	1	1	1	127.117	150.836	1	1	1	1	1	1	1	1	1	1	1
GLA	1	1	1	50.1506	68.4388	1	40.3193	1	1	1	35.7323	1	1	1	1	1
GLCCI1	1	1	1	1	1	1	80.2046	1	1	1	1	1	1	1	1	1
GLI3	1	1	1	1	1	1	1	1	1	1	1	1	54.6277	56.2342	63.657	58.3379
GLIPR2	58.6823	1	1	181.149	155.519	117.492	1	1	1	48.8251	42.4764	1	48.848	46.1265	1	30.6346
GLIS2	1	1	1	1	1	1	1	1	1	1	30.5258	1	39.7334	44.7592	1	1
GLIS3	1	1	1	1	1	1	1	1	1	1	54.0905	1	1	51.7917	1	46.8335
GLMP	1	1	1	1	50.3607	1	1	1	52.2524	1	1	1	80.4076	66.24	64.8953	56.7852
GLRX2	1	1	1	1	37.4291	1	1	1	46.5824	1	1	1	1	1	1	1
GLT8D1	45.9305	1	1	1	1	1	35.7506	1	27.2934	1	48.3118	90.3211	91.6448	78.1477	1	58.2852
GLT8D2	1	1	1	1	1	1	1	1	1	1	75.7034	82.5125	118.131	135.429	137.622	66.7752
GLUL	169.183	252.626	1	833.031	1684.56	131.598	1	1	235.62	1068.19	234.822	188.23	337.994	135.431	409.893	124.463
GM2A	1	1	1	56.6094	162.93	1	1	1	1	61.6073	1	1	1	1	1	1
GMCL1	1	1	1	1	1	1	1	1	43.5216	1	1	1	1	1	1	1
GMDS	1	34.0746	1	1	1	1	26.0385	1	54.1472	1	1	1	1	1	1	1
GMFG	84.5588	202.428	528.113	620.644	452.977	473.497	134.258	245.307	1	209.377	82.7854	109.438	1	1	1	1
GMIP	1	1	1	61.0383	1	1	1	1	1	1	1	1	1	1	1	1
GMNN	1	1	1	1	1	1	1	1	65.761	1	1	1	1	1	1	1
GMPPA	1	1	1	1	1	1	27.0761	1	1	1	1	1	33.6139	46.802	1	38.6286
GMPPB	1	1	1	1	1	1	48.4062	1	1	1	1	1	1	25.9683	1	1
GMPR	1	1	1	1	1	1	1	1	1	114.825	1	1	1	1	1	1
GNA11	1	68.0357	1	1	1	1	1	1	27.2017	1	44.6378	1	1	48.4354	1	1
GNA13	1	1	1	92.1137	98.4232	1	1	1	1	1	1	1	1	1	1	1
GNA15	1	1	1	62.2453	55.729	1	1	1	1	1	1	1	1	1	1	1
GNAI1	48.3817	1	1	1	1	1	1	1	1	1	37.4559	87.9728	1	1	1	1
GNB5	1	1	1	1	1	1	1	1	1	1	1	1	1	28.1104	1	1
GNG11	241.297	1370.7	1	1	1	1	1	1	1	1	286.287	353.44	245.125	127.366	158.172	125.7
GNG2	1	1	107.24	58.8007	1	160.701	1	1	1	1	1	54.1241	40.5997	1	1	1
GNG7	1	1	1	1	1	1	67.0391	100.027	1	1	1	1	1	1	1	1
GNL3	57.9006	57.166	1	36.9057	1	1	90.2154	1	87.6701	53.6533	84.7507	42.9514	52.2306	54.475	1	64.9199
GNLY	1	1	1	1	1	3613.97	1	1	1	1	1	1	1	1	1	1
GNPAT	39.0762	1	1	1	1	1	1	1	51.517	1	1	1	1	32.8794	1	33.095
GNPDA1	1	1	1	40.2742	77.6675	1	1	1	1	1	1	1	45.1473	1	1	25.8755
GNPNAT1	1	1	1	1	1	1	1	1	30.8526	1	1	1	1	1	1	1
GNPTAB	1	1	1	43.1786	57.0479	132.556	1	1	1	251.5	1	1	1	56.38	1	1
GOLGA3	1	1	1	1	1	1	28.5082	1	37.1781	1	48.1195	1	1	52.4833	1	33.4684
GOLM1	1	1	1	1	1	1	1	1	225.362	1	37.8568	53.5401	53.6428	134.45	86.8693	85.0019
GOLPH3L	1	1	1	1	1	1	1	1	36.958	1	1	1	1	1	1	1
GOLT1B	1	1	1	1	35.2569	1	32.3218	1	37.2438	1	38.2911	48.5156	1	73.2957	1	30.9558
GON4L	44.3131	59.7097	63.9325	1	1	77.1982	1	1	50.849	1	43.1627	59.3595	1	31.6358	73.3137	29.8911
GOT2	1	1	1	1	1	1	1	1	40.4807	1	1	1	1	1	1	1
GPANK1	1	1	1	1	1	1	31.2783	1	34.7807	1	1	40.9668	1	30.7482	1	32.5575
GPATCH2	1	39.5505	1	1	1	1	1	1	45.5799	1	33.4015	64.4334	1	1	1	36.5619
GPATCH4	1	1	1	1	1	1	1	1	42.9679	1	41.1454	43.3536	1	1	1	34.7043
GPBP1L1	36.9539	54.2479	74.9327	48.0221	52.545	1	1	1	51.6787	1	36.7125	43.9087	1	36.4118	1	22.8058
GPC1	40.973	1	1	1	1	1	1	1	34.9366	1	50.2286	71.3199	1	68.4931	1	52.4342
GPC3	1	1	1	1	1	1	1	1	1	1	79.7047	1	248.28	1	82.3874	39.3536
GPC4	1	1	1	1	1	1	1	1	1	1	1	1	1	44.9429	1	1
GPC6	1	1	1	1	1	1	1	1	1	1	60.1153	98.7513	1	85.7709	1	57.0718
GPCPD1	1	1	1	124.226	130.469	1	1	1	1	1	1	1	1	1	1	23.3393
GPIHBP1	1	56.9028	1	1	1	1	1	1	1	1	1	1	1	1	1	1
GPM6B	80.302	1	1	1	1	1	1	1	1	1	1	1	1	48.089	78.3757	1
GPN3	1	1	1	1	1	1	1	1	34.1639	50.7848	1	1	1	1	1	1
GPNMB	57.1577	1	1	105.778	1120.48	1	1	1	1	1	109.118	58.0136	459.498	200.185	102.567	147.125
GPR107	1	1	1	1	1	1	1	1	1	1	1	1	1	34.1827	1	1
GPR116	1	97.9031	1	1	1	1	1	1	1	1	1	1	1	1	1	1
GPR124	1	1	1	1	1	1	1	1	1	1	58.8646	1	1	1	1	1
GPR137	1	1	1	1	1	1	1	1	1	1	1	1	1	35.0525	1	1
GPR137B	1	1	1	40.3419	93.2075	1	1	1	1	1	1	1	1	1	1	1
GPR146	1	64.8989	1	1	1	1	1	1	1	1	1	1	1	1	1	1
GPR155	1	1	1	1	50.7545	1	1	1	1	1	1	1	1	1	1	1
GPR160	1	1	1	1	1	1	1	1	63.0108	1	1	1	1	1	1	1
GPR171	1	1	201.926	1	1	215.994	1	1	1	1	1	1	1	1	1	1
GPR183	1	1	251.938	368.704	261.104	109.197	56.4851	369.565	1	110.205	1	1	1	1	1	1
GPR20	64.0725	1	1	1	1	1	1	1	1	1	1	1	1	1	1	1
GPR34	1	1	1	1	142.236	1	1	1	1	73.3134	1	1	1	1	1	1
GPR4	45.9626	60.1487	1	1	1	1	1	1	1	1	1	1	1	1	1	1
GPR65	1	1	86.1201	73.844	84.4001	189.4	1	1	1	357.779	1	1	1	1	1	1
GPRC5A	1	1	1	1	1	1	1	1	200.503	1	70.0864	1	73.3939	1	1	84.8838
GPRC5B	1	59.0447	1	1	1	1	1	1	1	1	1	1	1	1	1	1
GPRC5C	117.629	1	1	1	1	1	1	1	47.8471	1	1	1	1	1	1	1
GPRIN3	1	1	106.566	45.1227	72.4875	105.033	1	1	1	1	1	1	1	1	1	1
GPSM3	1	1	373.036	360.056	262.068	359.387	65.2206	370.637	1	119.115	1	1	1	1	1	1
GPX2	1	1	1	1	1	1	1	1	186.666	1	1	1	1	1	1	1
GPX3	528.336	145.1	1	1	96.965	1	1	1	69.3656	1	279.725	149.383	485.245	1	118.9	1
GPX7	1	1	1	1	1	1	1	1	1	1	39.4926	49.3677	44.6998	76.601	67.2632	82.9352
GPX8	40.5231	1	1	1	1	1	1	1	1	1	83.0649	103.796	97.9661	161.556	103.438	89.3201
GRAMD1A	1	97.2518	66.4189	60.2889	39.1015	1	30.424	1	38.0538	1	38.4649	56.5536	1	41.2567	54.3451	56.1602
GRAMD3	1	1	1	1	1	1	1	1	1	1	1	1	37.2354	27.9477	1	1
GRAP2	1	1	1	1	1	96.0882	1	1	1	249.166	1	1	1	1	1	1
GRASP	1	96.5867	1	1	1	1	1	1	1	1	1	1	1	1	1	1
GRB10	1	111.668	1	1	1	1	1	1	1	1	1	1	1	1	1	1
GRB7	1	1	1	1	1	1	1	1	43.1758	1	1	1	1	1	1	1
GREM1	1	1	1	1	1	1	1	1	1	1	143.114	1	228.546	179.62	1	1
GRIPAP1	1	1	1	1	1	1	1	1	1	1	1	1	1	29.3878	1	1
GRK5	79.0228	1	1	1	1	1	1	1	1	1	40.8523	73.0584	1	1	1	1
GRP	1	1	1	1	1	1	1	1	1	1	1	1	1	62.353	1	1
GS1.251I9.4	1	1	1	1	1	1	1	1	1	1	55.0842	1	1	1	1	1
GSAP	1	1	1	1	53.2734	1	1	1	1	1	1	1	1	1	1	1
GSK3B	49.4128	1	1	1	1	1	1	1	42.2218	1	1	1	44.3975	27.3232	1	1
GSN	606.401	1078.16	1	296.062	324.638	1	1	1	173.984	117.349	472.044	496.663	2433.29	343.057	444.677	250.678
GSS	1	1	1	1	1	1	1	1	38.3249	1	1	1	1	1	1	35.7915
GSTA4	38.6428	1	1	1	1	1	1	1	1	1	1	1	45.6931	34.7205	1	34.6898
GSTM3	98.21	1	1	1	1	1	1	1	60.1042	1	151.776	145.637	124.074	57.3395	142.565	95.2978
GSTM4	1	1	1	1	1	1	1	1	1	1	1	1	44.6013	1	1	1
GSTM5	1	1	1	1	1	1	1	1	1	1	49.7792	1	92.4465	1	1	1
GSTO2	1	1	1	1	1	1	1	1	51.7607	1	1	1	1	1	1	1
GSTZ1	1	1	1	1	1	1	1	1	34.9072	1	1	1	1	1	1	1
GTF2A1	1	1	1	1	1	1	42.6933	1	1	1	1	1	1	1	1	1
GTF2B	48.232	1	68.6536	57.8023	50.5595	82.6239	26.1648	69.4783	49.9556	70.6539	39.9615	1	48.7668	1	1	1
GTF2H1	1	1	1	1	1	1	1	1	1	1	1	1	1	28.9131	1	1
GTF3C5	1	1	1	1	1	1	1	1	33.0755	1	1	1	1	1	1	1
GUCY1A2	107.377	1	1	1	1	1	1	1	1	1	63.1471	1	1	1	1	1
GUCY1A3	197.462	1	1	1	1	1	1	1	1	1	101.444	46.6899	53.12	97.6997	1	1
GUCY1B3	151.963	1	1	1	1	1	1	1	1	1	64.0154	1	1	30.014	1	1
GULP1	1	1	1	1	1	1	1	1	48.369	1	53.4607	99.3755	73.121	50.0936	1	1
GXYLT2	1	1	1	1	1	1	1	1	1	1	1	1	50.8795	68.706	1	43.0325
GYG1	57.3555	1	1	74.9446	55.0077	95.369	1	1	1	1	37.9492	48.0633	48.5874	36.5665	1	27.6082
GZMA	1	1	361.608	1	1	2130.34	1	1	1	1	1	1	1	1	1	1
GZMB	1	1	1	1	1	2093.65	1	1	1	1	1	1	1	1	1	1
GZMH	1	1	1	1	1	698.829	1	1	1	1	1	1	1	1	1	1
GZMK	1	1	380.968	1	1	966.331	1	1	1	1	1	1	1	1	1	1
GZMM	1	1	169.09	1	1	304.577	1	1	1	1	1	1	1	1	1	1
H1FX	111.45	116.884	91.7673	81.3667	56.7324	95.0556	297.481	1	92.9019	114.747	108.2	111.954	55.6186	51.6766	58.199	31.7572
H2AFX	54.2594	55.9672	1	1	1	85.0434	1	1	40.4523	70.081	52.7074	1	1	24.4741	1	1
H2AFY2	1	1	1	1	1	1	1	1	1	1	1	1	1	44.4685	101.823	1
H6PD	1	1	1	1	1	1	1	1	1	1	30.8969	1	72.2868	47.5574	1	56.7021
HACD3	1	57.3958	1	1	1	1	1	1	57.4078	1	1	81.9763	74.0525	53.3667	71.1778	42.5234
HACD4	1	1	1	1	1	1	1	1	1	1	1	57.4888	35.6402	22.4178	1	24.6469
HADH	1	1	1	1	1	1	1	1	36.7809	1	1	1	39.4749	1	1	1
HAGH	52.6381	45.3836	68.8517	50.2511	43.7641	1	58.6576	1	52.4601	1	39.7912	1	1	41.239	1	1
HAMP	1	1	1	1	93.9331	1	1	1	1	1	1	1	1	1	1	1
HAND2	1	1	1	1	1	1	1	1	1	1	67.5827	1	1	1	1	42.2499
HAND2.AS1	1	1	1	1	1	1	1	1	1	1	36.9815	1	1	1	1	1
HAPLN1	1	1	1	1	1	1	1	1	1	1	1	147.176	1	1	1	1
HAPLN3	47.9257	1	1	1	1	1	1	1	1	1	1	1	1	48.1426	1	1
HAS1	1	1	1	1	1	1	1	1	1	1	1	1	1	1	1	164.261
HAS2	1	1	1	1	1	1	1	1	1	1	55.0984	57.2746	1	1	1	1
HAUS1	1	32.6612	1	1	1	1	1	1	1	1	1	1	1	1	1	27.1759
HAVCR2	1	1	1	91.9234	123.25	261.31	1	1	1	94.0236	1	1	1	1	1	1
HBB	1	1	1	1	1	1	1	1	1	1	1	1	1	1	1	59.1779
HBEGF	1	141.019	1	141.995	102.566	1	1	1	55.4613	1	1	1	1	1	1	1
HBS1L	1	1	1	1	1	1	1	1	1	1	41.2921	1	1	1	1	1
HCFC1	1	1	1	1	1	1	1	1	1	1	1	1	1	30.1308	1	1
HCG18	1	1	1	1	1	1	1	1	1	1	38.5265	1	1	60.7454	70.9575	23.5262
HCK	1	1	1	235.48	157.682	1	1	1	1	1	1	1	1	1	1	1
HCLS1	1	1	219.776	351.146	239.008	265.053	66.9033	196.994	1	84.2761	1	1	1	1	1	1
HCST	1	1	665.64	417.603	387.017	1225.09	62.8628	110.326	1	197.149	1	1	1	1	1	1
HDAC1	46.7332	89.1319	103.268	46.3266	1	112.303	1	91.5612	59.4608	1	40.1323	1	1	24.2406	1	30.711
HDAC3	1	1	1	1	1	1	1	1	1	1	1	1	34.2507	31.5196	1	1
HDAC5	60.5728	52.7148	1	1	1	1	1	1	1	1	49.0076	1	1	30.4789	1	1
HDC	1	1	1	1	1	1	1	1	1	399.459	1	1	1	1	1	1
HDDC3	1	1	1	1	1	1	30.1743	1	38.0497	1	1	1	1	1	1	1
HDHD3	1	1	1	1	1	1	1	1	35.3909	1	1	1	1	1	1	1
HECA	1	1	1	1	38.7086	1	1	1	1	1	1	1	1	1	1	1
HECW2	1	98.1828	1	1	1	1	1	1	1	1	1	1	1	1	1	1
HEG1	1	321.624	1	1	1	1	1	1	1	1	35.6408	48.2622	69.0283	95.6339	1	156.584
HEPH	1	1	1	1	1	1	1	1	1	1	1	1	1	49.3898	1	1
HERC1	1	55.8226	1	38.1151	1	1	1	1	1	1	1	1	1	30.6383	1	1
HERC5	1	1	1	1	1	1	1	1	1	1	1	1	1	42.1861	1	1
HERPUD1	187.536	263.229	290.578	370.04	305.078	333.485	2223.21	605.315	211.816	176.496	315.88	252.279	212.224	192.43	313.818	107.905
HERPUD2	1	1	1	1	1	95.3816	1	1	1	1	28.9967	1	48.1675	26.6549	1	22.1477
HES1	352.88	627.815	1	1	1	1	1	1	284.288	210.742	604.6	232.898	84.8175	96.7595	122.938	101.835
HES4	268.878	84.4882	1	1	1	1	1	1	131.87	1	171.192	1	1	74.4931	1	1
HEY1	1	120.262	1	1	1	1	1	1	1	1	1	1	1	1	1	1
HEY2	63.4037	1	1	1	1	1	1	1	1	1	1	1	1	1	1	1
HEYL	114.05	1	1	1	1	1	1	1	1	1	54.4607	1	1	1	1	1
HGF	1	1	1	1	1	1	1	1	1	1	88.8701	73.7646	50.337	1	1	1
HHEX	1	71.8278	1	48.2353	1	1	1	82.6265	1	1	1	1	1	1	1	1
HIBCH	1	54.8722	1	1	1	1	1	1	41.2614	1	32.5292	1	34.8388	1	69.6971	28.6864
HIC1	1	1	1	1	1	1	1	1	1	1	51.25	49.5286	60.0845	37.2914	1	1
HID1	1	1	1	1	1	1	1	1	35.9474	1	1	1	1	1	1	1
HIF3A	1	1	1	1	1	1	1	1	1	1	1	1	1	1	58.9186	1
HIGD1B	464.747	1	1	1	1	1	1	1	1	1	161.597	1	1	1	1	1
HILPDA	1	1	1	1	1	1	1	1	1	1	82.5369	1	64.4122	98.5457	1	59.2841
HIP1	87.3032	92.6749	1	1	1	1	1	1	1	1	56.0788	1	1	1	1	1
HIPK1	63.7319	51.5365	1	59.1737	51.7177	1	1	1	1	65.8255	33.7704	55.4436	1	1	1	31.3054
HIPK2	59.3487	70.4124	1	50.726	54.2057	1	46.5013	1	82.1389	84.3805	1	54.6985	1	1	1	41.0348
HIST1H1C	57.4291	1	1	1	1	1	221.744	1	207.727	59.1502	67.7481	1	1	1	1	1
HIST1H1D	1	1	1	1	1	1	69.4117	1	1	61.5646	1	1	1	1	1	1
HIST1H2AC	1	1	1	1	1	1	66.8579	1	124.886	1	1	1	1	1	1	36.1167
HIST1H2BD	1	1	1	1	1	1	1	1	52.3557	1	1	1	1	1	1	1
HIST1H2BG	1	1	1	1	1	1	68.6771	1	69.4154	1	1	1	1	1	1	1
HIST1H2BK	1	1	1	1	1	1	1	1	65.8743	1	1	1	1	1	1	1
HIST2H2BE	1	1	1	1	1	1	1	1	75.3201	1	1	1	1	1	1	1
HIST3H2A	1	1	1	1	1	1	1	1	62.1912	1	1	1	1	1	1	1
HK1	48.2305	51.4284	1	44.7832	42.8244	1	1	1	1	1	1	1	1	1	1	1
HK2	1	1	1	63.6044	82.7883	1	1	1	1	54.7806	1	1	1	1	1	1
HK3	1	1	1	60.0029	1	1	1	1	1	1	1	1	1	1	1	1
HLA.DMA	1	136.374	1	560.431	706.433	96.4596	84.7973	515.594	1	1	1	1	1	1	1	1
HLA.DMB	1	49.5853	1	342.555	423.519	1	1	316.321	1	1	1	1	1	1	1	1
HLA.DOA	1	1	1	45.8666	71.5119	1	1	84.6815	1	1	1	1	1	1	1	1
HLA.DOB	1	1	1	1	1	1	38.6388	138.253	1	1	1	1	1	1	1	1
HLA.DPA1	1	305.623	222.817	3537.43	3455.76	471.07	138.371	2397.07	79.9708	218.303	68.7168	1	59.5159	32.9826	1	51.5791
HLA.DPB1	43.5733	328.649	224.397	3578.86	3109.25	548.243	77.7313	2580.74	74.2587	149.74	69.1647	59.898	68.701	38.5588	1	68.7111
HLA.DQA1	1	1	1	1285.52	1212.4	102.029	46.5974	1278.54	1	1	1	1	1	1	1	1
HLA.DQA2	1	1	1	243.925	257.316	1	1	283.052	1	1	1	1	1	1	1	1
HLA.DQB1	1	114.946	94.0238	1310.34	1156.87	109.125	60.959	1228.48	1	1	1	1	1	1	1	1
HLA.DQB2	1	1	1	114.716	1	1	1	1	1	1	1	1	1	1	1	1
HLA.DRA	1	745.842	179.832	8079.46	7974.94	504.955	188.048	6137.32	215.946	178.73	109.615	69.9161	88.1985	73.0361	1	122.382
HLA.DRB1	1	916.572	255.091	4016.37	3755.22	662.615	162.498	2888.34	101.274	247.483	99.8558	1	66.2084	1	1	101.944
HLA.DRB5	1	315.432	1	1096.13	1027.4	183.174	1	878.703	1	1	1	1	1	1	1	1
HLA.F	97.6981	174.154	310.474	146.431	110.643	392.903	66.6115	224.736	44.1329	1	50.8155	66.4775	1	75.4693	1	34.23
HLTF	1	1	1	1	1	1	1	1	29.5308	98.6877	42.2266	1	1	1	1	1
HLX	1	51.6614	1	1	1	1	1	1	1	1	1	1	1	26.1874	1	43.3316
HMBOX1	1	80.868	1	1	1	1	1	1	1	1	1	1	1	1	1	1
HMCES	1	1	1	1	1	1	52.6079	1	33.8193	1	1	1	1	1	1	1
HMCN1	1	1	1	1	1	1	1	1	1	1	1	1	80.6019	75.3068	81.6543	1
HMGA1	1	1	75.3607	128.66	81.7767	100.894	55.6461	138.47	241.785	1	1	1	1	1	1	86.9989
HMGA2	1	1	1	1	1	1	1	1	1	1	1	1	1	1	70.261	1
HMGB3	1	1	1	1	1	1	1	1	66.1314	1	1	1	1	1	1	1
HMGCS1	1	1	1	1	1	1	1	1	58.363	1	1	1	1	1	1	1
HMGXB3	1	1	1	1	1	1	1	1	1	1	1	51.6946	1	31.8765	1	33.1499
HMGXB4	42.5879	40.8445	1	1	1	1	1	1	50.4999	1	68.5285	56.3452	40.3027	48.8223	126.77	51.4152
HMHA1	1	1	141.076	95.9768	67.6301	119.619	1	105.264	1	1	1	1	1	1	1	1
HMOX1	1	1	1	138.831	364.613	1	1	1	1	1	1	1	1	1	1	86.0751
HMOX2	76.3435	58.6049	110.798	1	32.1286	132.85	1	1	40.9847	1	62.6394	1	54.2996	55.4142	71.6623	54.0617
HN1L	1	1	1	1	1	1	1	1	67.8297	1	1	1	1	1	1	1
HNRNPLL	1	1	1	1	1	78.7177	1	1	1	1	1	1	1	1	1	23.4126
HOMER1	1	1	1	1	1	1	1	1	1	1	1	1	1	1	1	28.4464
HOMER2	1	1	1	1	1	1	1	1	48.8543	1	1	1	1	1	1	1
HOOK2	1	1	1	1	1	1	1	1	95.2893	1	34.0411	1	52.318	42.0362	55.4688	33.7322
HOPX	223.108	1	1	1	1	400.394	1	96.4341	1	1	360.824	1	1	271.546	1	74.2911
HOXA10	1	1	1	1	1	1	1	1	43.8349	1	1	66.0061	1	1	104.277	1
HOXB.AS1	104.988	1	1	1	1	1	1	1	1	1	1	1	1	32.2932	1	1
HOXB13	1	1	1	1	1	1	1	1	59.268	1	1	1	1	1	1	1
HOXB2	61.2409	44.2189	1	1	1	1	1	1	1	72.4248	56.2639	1	36.1249	96.4411	1	41.3838
HOXB3	1	1	1	1	1	1	1	1	1	1	1	1	1	40.0996	1	1
HOXB4	1	1	1	1	1	1	1	1	1	1	1	1	1	29.712	1	1
HOXB7	1	1	1	1	1	1	1	1	1	1	1	1	1	31.2585	1	1
HP	1	1	1	1	1	1	1	1	1	1	1	1	1	1	1	371.428
HPCAL1	1	91.2423	71.5174	86.1575	87.7006	72.314	36.9525	69.4642	53.0209	81.8158	1	1	1	27.7568	1	41.2558
HPGD	1	1	1	1	1	1	1	1	46.789	890.717	1	1	1	1	1	1
HPGDS	1	1	1	1	1	1	1	1	1	1072.2	1	1	1	1	1	1
HPN	1	1	1	1	1	1	1	1	70.5227	1	1	1	1	1	1	1
HPRT1	48.0338	56.4544	1	74.5229	48.8069	1	1	1	45.7448	57.943	33.7084	1	1	22.654	1	1
HPS3	1	1	1	1	38.889	1	1	1	1	1	1	1	1	1	1	1
HPS4	1	1	1	1	1	1	1	1	43.6069	1	1	1	1	39.5575	1	1
HRAS	1	1	1	1	1	1	1	1	38.0755	1	1	1	1	1	1	1
HRH2	1	1	1	56.7637	1	1	1	1	1	1	1	1	1	1	1	1
HS2ST1	1	1	1	1	1	1	1	1	1	1	41.5838	1	1	34.4571	1	76.0467
HS3ST1	1	1	1	1	1	1	1	1	1	147.487	1	1	1	1	1	1
HS6ST1	1	1	1	1	1	1	1	1	1	93.937	1	1	1	1	1	1
HSBP1L1	1	1	1	1	1	1	1	1	78.3	1	31.5407	1	1	30.9672	1	59.8843
HSCB	1	1	1	1	1	1	29.2472	1	1	1	1	1	1	31.7449	1	1
HSD11B1	1	1	1	1	1	1	1	1	1	1	93.4356	1	54.6127	1	1	1
HSD17B12	70.8501	101.666	1	42.2672	49.5484	1	36.4191	1	79.7199	143.701	53.2776	82.0524	78.5188	63.2747	1	51.3168
HSD17B14	1	1	1	1	37.0823	1	1	1	1	1	1	1	1	1	1	1
HSD17B2	1	1	1	1	1	1	1	1	1	1	1	126.891	1	1	1	1
HSD17B4	1	1	1	44.2729	78.1445	1	1	1	56.3865	108.711	1	1	37.3204	1	1	25.7345
HSD17B6	1	1	1	1	1	1	1	1	115.508	1	1	1	1	1	1	1
HSD17B8	1	1	1	1	1	1	49.8436	1	1	1	1	1	1	1	1	1
HSDL2	56.6457	1	1	1	1	1	1	1	1	1	1	1	1	1	1	1
HSH2D	1	1	1	1	1	1	82.8832	105.67	1	1	1	1	1	1	1	1
HSPA12B	1	80.0718	1	1	1	1	1	1	1	1	1	1	1	1	1	1
HSPA13	1	1	1	1	1	1	59.7457	1	1	1	1	1	1	1	1	1
HSPA2	96.4975	54.5511	1	1	1	1	1	1	1	1	55.955	1	1	1	1	1
HSPA4	50.9829	42.2549	1	43.6902	42.7187	1	1	95.2824	40.6309	1	35.6814	45.2623	40.9833	38.8208	1	33.0584
HSPA6	1	1	1	230.885	155.224	1	119.939	1	1	1	342.174	1	1	1	1	1
HSPB2	68.9559	1	1	1	1	1	1	1	1	1	34.6077	1	1	1	1	48.529
HSPB6	138.345	1	1	1	1	1	1	1	1	1	78.6249	1	343.755	43.7286	57.01	54.6655
HSPB8	63.7776	1	1	1	1	1	1	1	1	1	1	1	36.2931	1	1	63.5187
HSPBP1	1	1	1	1	1	1	1	1	35.9692	1	1	1	1	1	1	33.9149
HSPG2	65.0411	1070.04	1	1	1	1	1	1	41.9215	1	97.7388	88.1766	179.236	251.131	115.28	94.9741
HTRA1	70.9991	220.825	1	1	1	1	1	1	1	1	184.239	158.954	447.075	471.532	323.037	249.581
HTRA3	1	1	1	1	1	1	1	1	1	1	141.307	99.7252	145.972	258.977	1	37.0684
HVCN1	1	1	1	1	29.6671	1	1	206.963	1	1	1	1	1	1	1	1
HYAL2	1	569.257	1	1	1	1	1	1	27.1211	1	33.3524	1	1	31.6543	51.0221	49.2293
HYI	67.5872	1	1	1	1	1	40.0977	1	36.3306	82.6906	54.791	1	62.4574	32.4118	1	38.9659
HYOU1	1	1	1	1	1	1	38.8018	1	44.0442	1	1	1	1	1	1	1
IBTK	1	1	1	1	1	1	1	1	35.0715	1	1	63.5566	1	59.5609	1	32.3251
ICA1	1	61.4311	1	1	1	1	1	1	67.0227	1	1	1	1	1	1	1
ICAM1	1	233.825	1	107.837	106.946	1	1	1	1	1	106.296	61.7896	1	39.1194	1	70.5194
ICAM2	1	331.4	97.2647	1	1	1	106.549	1	1	1	1	1	1	1	1	1
ICAM3	1	1	274.672	250.528	109.273	253.078	192.626	190.326	32.6479	77.3401	1	1	1	27.9872	1	1
ICE1	1	1	1	1	1	1	1	1	1	1	1	1	1	27.6857	1	34.5413
ICK	1	1	1	1	1	1	1	1	1	1	1	1	1	27.6429	1	1
ICMT	1	1	1	1	1	1	1	1	1	1	1	42.7432	1	30.0024	1	21.2968
ICOS	1	1	195.843	1	1	96.933	1	1	1	1	1	1	1	1	1	1
ID1	345.933	1260.83	1	1	1	1	1	1	238.75	1	188.969	239.32	174.606	157.398	327.874	165.673
ID4	247.733	1	1	1	1	1	1	1	1	1	86.4844	1	1	1	1	59.6934
IER3IP1.1	1	1	1	1	1	1	45.6775	1	1	1	56.1344	1	1	1	1	1
IER5	63.5408	83.552	1	123.492	138.793	1	1	72.3796	36.9416	194.747	64.6286	1	1	1	1	1
IER5L	81.0095	48.4258	1	1	50.0254	1	1	1	1	1	139.567	1	1	37.3883	1	1
IFFO1	1	1	1	1	1	1	1	1	1	1	1	1	1	36.7197	1	1
IFI27L1	1	1	1	1	1	1	47.6395	1	1	1	1	1	1	1	1	1
IFI30	1	1	1	249.984	244.857	1	1	1	1	1	1	1	1	1	1	1
IFI44L	1	145.589	1	72.0547	81.8938	165.468	1	108.273	1	1	1	1	1	136.675	1	35.0817
IFIT1	1	1	1	1	1	1	1	1	1	1	1	1	47.9731	79.6583	1	1
IFIT2	1	1	1	120.237	103.278	1	1	1	1	1	1	1	1	1	1	1
IFIT3	57.2375	51.974	1	101.299	108.512	1	1	1	1	1	1	1	1	116.353	1	1
IFITM1	515.751	522.041	674.382	174.705	1	900.983	135.859	170.292	59.9219	1	249.757	168.813	485.808	394.484	197.638	118.53
IFNAR1	44.3039	63.7612	1	91.8704	108.734	1	94.7281	1	37.869	1	69.2845	45.4517	49.5891	55.2532	1	34.3685
IFNAR2	1	62.4041	66.2436	73.1198	66.3679	1	118.698	1	1	1	1	1	1	37.4855	1	1
IFNG	1	1	1	1	1	458.388	1	1	1	1	1	1	1	1	1	1
IFRD2	42.8217	1	1	1	1	1	1	1	58.0172	1	1	1	1	25.9337	1	32.568
IFT22	1	1	1	1	1	1	1	1	41.6922	1	1	48.7268	33.0311	40.9977	80.293	50.4744
IFT27	1	1	1	1	1	1	33.4906	1	52.9627	1	34.0523	47.4165	46.7338	49.5389	72.1044	37.7784
IFT57	73.1853	42.7263	1	1	1	1	1	134.534	101.095	1	57.9714	68.1993	64.8129	43.9132	114.388	69.5121
IGF1	1	1	1	1	1	1	50.1573	1	1	1	1	160.019	757.435	165.277	210.322	563.859
IGF2	1	195.522	1	1	1	1	1	1	160.881	1	138.584	118.964	258.475	335.328	361.028	84.7006
IGF2BP2	1	1	1	1	1	1	1	1	67.3739	1	1	1	1	25.3906	82.0764	37.4477
IGFBP2	204.012	151.214	1	1	1	1	1	1	189.214	1	309.427	121.084	1	242.377	632.974	340.39
IGFBP3	1	606.405	1	1	1	1	1	1	111.012	1	715.928	278.836	224.982	326.246	226.785	152.177
IGFBP4	540.598	789.139	1	1	1	1	1	1	43.0246	1	855.744	476.625	1955	692.925	574.495	478.271
IGFBP5	888.577	830.364	1	1	1	1	1	1	1	1	2347.24	3563.3	1540.92	1421.59	1486.49	425.414
IGFBP6	137.733	1	1	1	1	1	1	1	1	1	178.71	358.298	1298.15	260.793	188.602	587.717
IGFBP7	12890.4	5499.03	1	79.2341	1	1	55.6613	1	264.934	1	10504.5	5154.94	3322.85	4468.35	2822	1622.25
IGHA1	1	1	105.122	45.9321	66.133	145.712	28209.8	339.045	1	1	1	408.956	76.0725	1	1	42.8297
IGHA2	1	1	1	1	1	1	1831.09	1	1	1	1	1	1	1	1	1
IGHD	1	1	1	1	1	1	1	132.515	1	1	1	1	1	1	1	1
IGHG1	1	1	1	1	1	1	26818.4	300.44	1	1	1	1	40.6703	46.0584	1	1
IGHG2	1	1	1	1	1	1	5598.43	1	1	1	1	1	1	1	1	1
IGHG3	1	1	91.9652	1	1	1	37549.1	235.836	1	1	1	104.156	45.0038	64.3009	1	79.4195
IGHG4	1	1	1	1	1	1	16507.2	161.316	1	1	1	132.885	57.3625	1	1	37.1237
IGHGP	1	1	1	1	1	1	4718.05	1	1	1	1	1	1	1	1	1
IGHM	1	1	1	1	1	1	3108.83	437.294	1	1	1	1	1	1	1	1
IGHV3.23	1	1	1	1	1	1	4221.77	1	1	1	1	1	1	1	1	1
IGJ	1	1	1	1	1	1	13221.2	1	1	1	1	1	1	1	1	1
IGKC	270.788	1707.51	716.046	335.378	461.518	875.922	220290	3306.99	384.79	360.965	1	1076.47	254.098	325.648	627.152	299.67
IGKV1.12	1	1	1	1	1	1	1827.86	1	1	1	1	1	1	1	1	1
IGKV1.5	1	1	1	1	1	1	138.285	1	1	1	1	1	1	1	1	1
IGKV3.20	1	1	1	1	1	1	4916.03	1	1	1	1	1	1	1	1	1
IGKV4.1	1	1	1	1	1	1	2230.06	1	1	1	1	1	1	1	1	1
IGLC2	1	1	100.259	1	66.1234	154.077	45816.9	910.62	65.9121	1	1	88.5036	65.6016	63.1054	1	58.9159
IGLC3	1	1	1	1	1	1	32740.5	586.788	1	1	1	1	63.1585	47.9224	1	1
IGLL5	1	1	1	1	1	1	35903.4	1	1	1	1	1	1	1	1	1
IGLV3.1	1	1	1	1	1	1	6521.02	1	1	1	1	1	1	1	1	1
IGLV6.57	1	1	1	1	1	1	409.717	1	1	1	1	1	1	1	1	1
IGSF6	1	1	1	333.542	321.266	1	1	1	1	1	1	1	1	1	1	1
IKBIP	73.5338	50.3717	1	49.5132	1	1	66.4239	1	1	1	77.9873	84.7674	60.6862	90.9045	51.1549	70.7738
IKBKB	1	55.7893	1	1	1	1	1	1	1	1	1	1	1	1	1	1
IKZF1	1	1	212.652	87.5165	58.5224	164.542	32.515	96.6042	1	85.8722	1	1	1	1	1	1
IKZF3	1	1	137.845	1	1	209.567	1	97.1007	1	1	1	1	1	1	1	1
IL10RA	1	1	206.228	84.3925	93.2428	155.189	59.5019	1	1	1	1	1	1	1	1	1
IL11RA	1	1	1	1	1	1	1	1	1	1	1	1	53.8299	1	1	1
IL15RA	1	1	1	1	1	1	1	1	1	1	1	38.6156	67.446	1	1	1
IL16	1	1	131.886	56.1036	1	144.998	50.6924	167.767	1	1	1	1	1	1	1	1
IL17RA	1	1	1	187.152	102.154	1	1	1	1	1	1	1	1	1	1	1
IL17RC	1	1	1	1	1	1	1	1	1	1	1	1	32.9381	1	1	1
IL18	1	1	1	97.8259	134.926	1	1	1	63.7134	258.469	1	1	1	1	1	42.2738
IL18R1	1	1	1	1	1	1	1	1	1	92.8246	1	1	1	1	1	1
IL1B	1	1	1	834.706	505.271	1	1	1	1	1	1	1	1	1	1	1
IL1R1	1	77.6598	1	1	1	1	1	1	48.2997	1	159.942	178.291	146.305	129.335	81.3069	235.933
IL1R2	1	1	1	149.512	1	1	1	1	1	1	1	1	1	1	1	1
IL1RAP	1	1	1	83.9648	1	1	1	1	1	1	1	1	1	1	1	1
IL1RL1	1	1	1	1	1	1	1	1	1	601.944	1	1	1	1	1	1
IL1RN	1	1	1	293.002	279.14	1	1	1	1	1	1	1	1	1	1	1
IL27RA	1	1	88.251	1	1	81.9406	1	1	1	1	1	1	1	1	1	1
IL2RA	1	1	1	1	51.833	1	1	1	1	1	1	1	1	1	1	1
IL2RB	1	1	116.354	1	1	222.984	1	1	1	1	1	1	1	1	1	1
IL2RG	1	1	534.43	125.078	71.7438	560.573	140.275	177.003	1	1	1	1	1	1	1	1
IL32	136.313	367.494	2392.88	81.6923	1	2198.65	123.456	1	260.844	1	332.695	209.118	172.834	392.725	121.31	138.173
IL33	1	223.235	1	1	1	1	1	1	1	1	1	1	60.703	1	1	1
IL34	1	1	1	1	1	1	1	1	1	1	1	59.7726	35.6572	1	1	1
IL3RA	1	146.423	1	1	1	1	1	1	1	1	1	1	1	1	1	1
IL4I1	1	1	1	86.9194	123.314	1	1	1	1	1	1	1	1	1	1	1
IL4R	1	65.175	1	78.5991	82.0699	1	1	86.7198	1	74.3703	1	1	1	42.5156	1	1
IL6	1	1	1	1	1	1	1	1	1	1	1	1	1	1	1	68.0568
IL6R	1	1	1	138.589	97.4254	1	1	1	1	1	1	1	1	1	1	1
IL7R	1	1	1244.24	111.782	96.618	578.85	1	1	1	1	1	57.9558	1	1	1	1
IL8	1	1	1	995.269	698.639	1	1	1	126.812	1	202.399	1	1	1	1	1
ILDR2	1	1	1	1	1	1	1	1	1	1	1	1	1	1	1	24.2485
ILF3.AS1	48.8847	1	83.76	50.8569	1	1	1	99.8043	49.7136	107.699	1	1	58.0832	34.6819	87.3999	33.2872
ILVBL	1	1	1	1	1	1	1	1	1	1	1	1	1	32.6636	1	31.1222
IMPA2	51.9143	1	1	1	1	1	1	1	33.7335	1	1	1	1	1	1	1
IMPDH1	1	1	1	73.4921	50.5025	1	1	1	1	1	1	1	1	28.2769	1	1
INADL	1	1	1	1	1	1	1	1	57.9914	1	1	1	1	1	1	1
INAFM1	89.4433	1	1	1	1	1	1	1	1	1	1	52.2416	107.792	64.8856	1	58.7125
INF2	48.8146	41.1032	1	1	1	1	1	1	36.0218	1	1	1	1	1	1	1
ING1	43.5829	1	1	1	1	1	1	1	1	1	62.1811	1	1	1	1	1
[truncated: 2,653 more rows]
